# Supplementary material for: Computational insight into gold(i)-catalyzed intramolecular regioselectivity of tryptamine-ynamide cycloisomerizations
Source: Royal Society of Chemistry journal article supplement (doi:10.1039/d3ob00079f), 2023-01-01
Supplement: d3ob00079f1.pdf [file d3ob00079f1.pdf]

## Supporting Information

### Computational Insight into Gold(I)-Catalyzed Intramolecular Regioselectivity of Tryptamine-Ynamide Cycloisomerizations

Shitao Sun,<sup>†,‡</sup> Jinle Hao,<sup>†,‡</sup> Maosheng Cheng<sup>†</sup>, Yongxiang Liu<sup>†,‡</sup>, Bin Lin<sup>\*,†,‡</sup>

<sup>†</sup> Key Laboratory of Structure-Based Drug Design and Discovery of Ministry of Education, Shenyang Pharmaceutical University, Shenyang 110016, P. R. China

<sup>‡</sup> Wuya College of Innovation, Shenyang Pharmaceutical University, Shenyang 110016, P. R. China

## Contents

|                                                                 |    |
|-----------------------------------------------------------------|----|
| Computational Data .....                                        | S3 |
| Table S1. The absolute values of D/I and EDA.....               | S3 |
| Figure S1. The Free energy profiles of counterion effects ..... | S4 |
| Figure S2. The IRI analysis.....                                | S5 |
| Cartesian coordinates for all optimized geometries.....         | S6 |

## 1. Computational Data

**Table S1. Absolute values of distortion/interaction and energy decomposition analysis of transition state structures at the M06-2X/DEF2-TZVP level**

| TS structures  | $\Delta E_{act}$ | $\Delta E_{int}$ | $\Delta E_{Elstat}$ | $\Delta E_{Ind}$ | $\Delta E_{Disp}$ | $\Delta E_{Pauli}$ | $\Delta E_{dist}$ | $\Delta E_{dist, tryptamine-ynamide}$ | $\Delta E_{dist, catalyst}$ |
|----------------|------------------|------------------|---------------------|------------------|-------------------|--------------------|-------------------|---------------------------------------|-----------------------------|
| <b>1-1a-ts</b> | 1.37             | -39.73           | -71.87              | -62.00           | -32.41            | 126.55             | 41.10             | 38.69                                 | 2.41                        |
| <b>1-1b-ts</b> | 6.80             | -20.64           | -54.96              | -50.24           | -30.17            | 114.73             | 27.44             | 25.20                                 | 2.24                        |
| <b>2-1a-ts</b> | 2.92             | -37.15           | -70.76              | -61.12           | -44.08            | 138.81             | 40.07             | 36.97                                 | 3.10                        |
| <b>2-1b-ts</b> | 10.63            | -27.39           | -65.42              | -56.48           | -40.76            | 135.27             | 38.02             | 35.89                                 | 2.13                        |
| <b>3-1a-ts</b> | 12.74            | -38.71           | -75.48              | -62.46           | -31.76            | 130.99             | 51.45             | 48.66                                 | 2.79                        |
| <b>3-1b-ts</b> | 6.93             | -32.35           | -72.02              | -58.69           | -36.56            | 134.92             | 39.28             | 36.99                                 | 2.29                        |
| <b>4-1a-ts</b> | 9.62             | -33.33           | -68.12              | -60.02           | -30.85            | 125.66             | 42.95             | 40.56                                 | 2.39                        |
| <b>4-1b-ts</b> | 8.43             | -27.62           | -65.92              | -56.28           | -35.17            | 129.75             | 36.05             | 34.02                                 | 2.03                        |

The energies were given in kcal/mol.

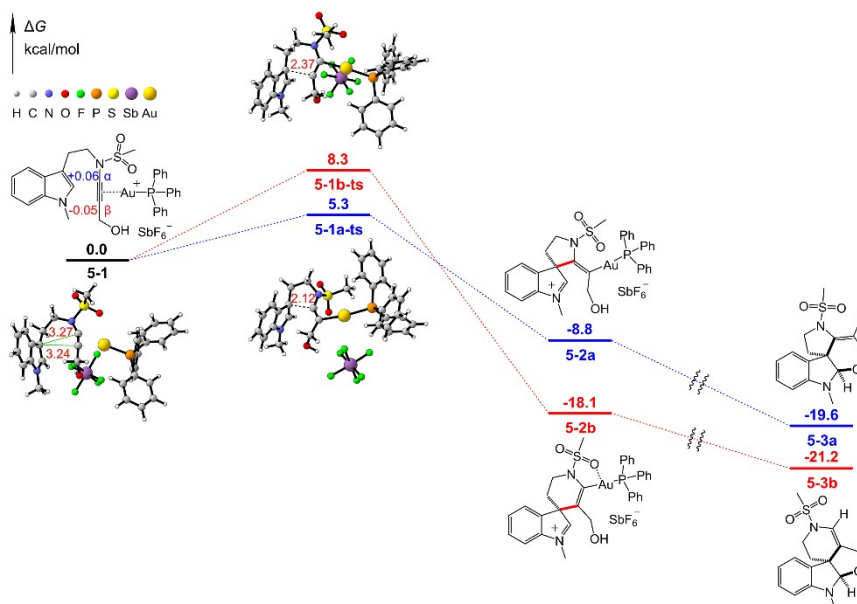

**Figure S1.** Free energy profiles (in kcal/mol) for the two possible cyclization pathways of **5-1** (containing complex **1-1** with  $\text{SbF}_6^-$  counterion). The blue lines represent the 5-*exo-dig* pathway and the red ones represent 6-*endo-dig* pathway. Bond lengths and natural atomic charges were shown in Å and *e*, respectively.

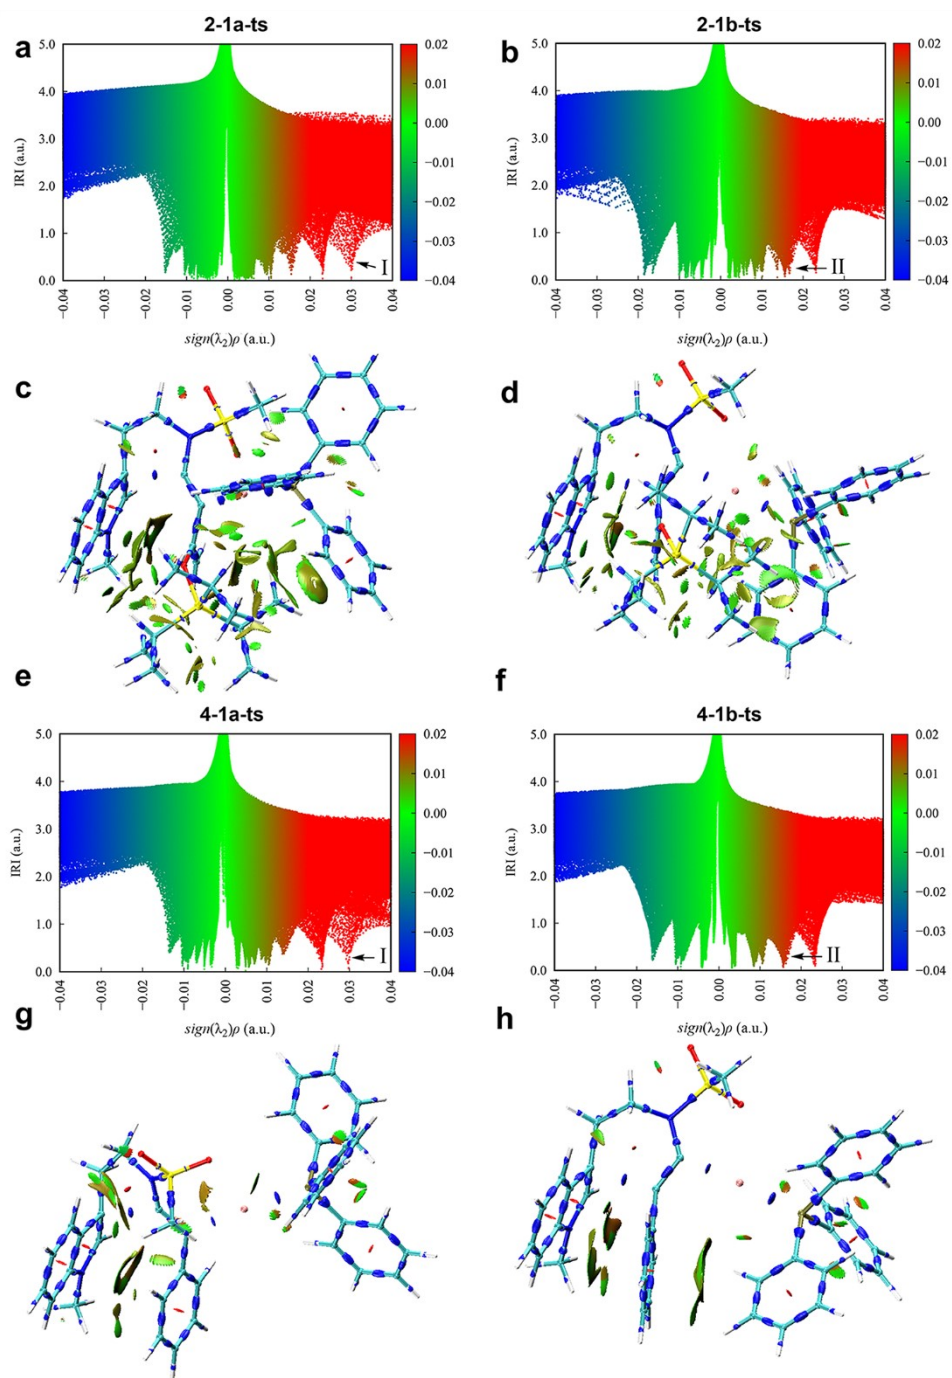

**Figure S2.** The IRI analysis of the TS structures of the first cyclization step. The scatter plots of IRI vs  $sign(\lambda_2)\rho$  (a, b, e and f) and the corresponding 3D gradient isosurfaces (c, d, g and h).

## 2. Cartesian coordinates for all optimized geometries

1-1

$E_{\text{sol}} = -2487.273332$  Hartree

Thermal correction to Free Energy = 0.499113 Hartree

Sum of electronic and thermal Free Energies = -2486.774219 Hartree

Number of Imaginary Frequencies = 0

|    |             |             |             |
|----|-------------|-------------|-------------|
| C  | -6.84230700 | -1.30113000 | 1.84201500  |
| C  | -6.69424500 | 0.05282100  | 2.16255200  |
| C  | -5.95490500 | 0.90021300  | 1.36407000  |
| C  | -5.34813300 | 0.38898600  | 0.21517800  |
| C  | -5.52419500 | -0.98029100 | -0.09382800 |
| C  | -6.26341000 | -1.83823300 | 0.70959800  |
| H  | -7.43292200 | -1.94561100 | 2.49926800  |
| H  | -7.17614100 | 0.44243200  | 3.06350700  |
| H  | -5.85327400 | 1.95915400  | 1.62479700  |
| C  | -4.53675700 | 0.94315200  | -0.81810700 |
| C  | -4.27517000 | -0.08511300 | -1.68037400 |
| N  | -4.86014500 | -1.23295300 | -1.25144000 |
| C  | -4.10617300 | 2.35653000  | -0.94984300 |
| H  | -3.65028200 | 2.53223400  | -1.93869900 |
| H  | -4.99278100 | 3.01554500  | -0.90719800 |
| C  | -1.40100700 | 1.23633300  | 0.07792300  |
| C  | -1.67300300 | 0.04554100  | 0.27108900  |
| H  | -3.68527400 | -0.09040000 | -2.59621600 |
| Au | 0.75839700  | 0.41704900  | 0.01571400  |
| P  | 2.86845200  | -0.59598900 | 0.00262100  |
| C  | 4.18709900  | 0.54759100  | -0.44102000 |
| C  | 5.38302300  | 0.10269300  | -0.99910500 |
| C  | 4.00040300  | 1.90585200  | -0.19853600 |
| C  | 6.38451700  | 1.01049600  | -1.29412700 |
| H  | 5.53343900  | -0.96231500 | -1.20553800 |
| C  | 5.00623700  | 2.80806400  | -0.49573500 |
| H  | 3.05053300  | 2.25934200  | 0.22194500  |
| C  | 6.19751300  | 2.36019300  | -1.04185000 |
| H  | 7.32247900  | 0.65838600  | -1.73158200 |
| H  | 4.85358500  | 3.87363300  | -0.30672000 |
| H  | 6.98973000  | 3.07372000  | -1.28287100 |
| C  | 3.27789500  | -1.28154800 | 1.61862300  |
| C  | 2.26815500  | -1.93993100 | 2.31680200  |
| C  | 4.54797000  | -1.18578200 | 2.17787400  |
| C  | 2.52714800  | -2.50953600 | 3.54883600  |
| H  | 1.26072700  | -2.00558200 | 1.88616000  |
| C  | 4.79942500  | -1.75002800 | 3.41758400  |

|   |             |             |             |
|---|-------------|-------------|-------------|
| H | 5.35107000  | -0.66504700 | 1.64677300  |
| C | 3.79472700  | -2.41214900 | 4.10108700  |
| H | 1.72908400  | -3.02712200 | 4.08767300  |
| H | 5.79841800  | -1.66870600 | 3.85413300  |
| H | 3.99938000  | -2.85409300 | 5.07994300  |
| C | 2.97538600  | -1.96761300 | -1.16346200 |
| C | 2.34112700  | -1.83718100 | -2.39699700 |
| C | 3.69412100  | -3.12332100 | -0.87571400 |
| C | 2.43775100  | -2.84699300 | -3.33675100 |
| H | 1.76768600  | -0.92964300 | -2.62305900 |
| C | 3.78167300  | -4.13321200 | -1.81894700 |
| H | 4.19436800  | -3.23642800 | 0.09178300  |
| C | 3.15676400  | -3.99570600 | -3.04690200 |
| H | 1.93986600  | -2.73864300 | -4.30392900 |
| H | 4.34753500  | -5.03990900 | -1.58912600 |
| H | 3.22627800  | -4.79677700 | -3.78768200 |
| C | -1.93352000 | -1.38198900 | 0.30973600  |
| H | -2.99149200 | -1.48632500 | 0.62178300  |
| H | -1.34538900 | -1.84640700 | 1.12606500  |
| O | -1.79202100 | -2.03560200 | -0.89615700 |
| H | -0.85561900 | -2.04862300 | -1.11250800 |
| C | -3.16000500 | 2.87287400  | 0.11582700  |
| H | -3.18926100 | 3.97181000  | 0.11904900  |
| N | -1.76284800 | 2.50790400  | -0.12737300 |
| H | -3.45201600 | 2.51965500  | 1.12301800  |
| S | -0.60223700 | 3.69659100  | 0.13786700  |
| O | 0.63734700  | 3.12490800  | -0.29801300 |
| O | -1.11234800 | 4.88126700  | -0.46569000 |
| C | -0.56830300 | 3.88704400  | 1.87296000  |
| H | -1.55627700 | 4.21053600  | 2.22575600  |
| H | -0.28209600 | 2.93570900  | 2.34122500  |
| H | 0.17531100  | 4.65733900  | 2.11468200  |
| C | -4.78554600 | -2.50031600 | -1.88997200 |
| H | -4.35286600 | -3.25829000 | -1.21772600 |
| H | -5.78215700 | -2.84532600 | -2.20960400 |
| H | -4.14221300 | -2.42548400 | -2.77388300 |
| H | -6.38700500 | -2.89473700 | 0.45549700  |

### 1-1a-ts

$E_{\text{sol}} = -2487.267598$  Hartree

Thermal correction to Free Energy = 0.504286 Hartree

Sum of electronic and thermal Free Energies = -2486.763312 Hartree

Number of Imaginary Frequencies = 1

|   |            |            |            |
|---|------------|------------|------------|
| C | 5.19878300 | 0.76592000 | 2.99146000 |
|---|------------|------------|------------|

|    |             |             |             |
|----|-------------|-------------|-------------|
| C  | 4.17181300  | 0.07145400  | 3.62799900  |
| C  | 3.50783400  | -0.96527300 | 2.99678300  |
| C  | 3.89308600  | -1.31144000 | 1.71076500  |
| C  | 4.94403400  | -0.61556900 | 1.10242200  |
| C  | 5.60555300  | 0.43413500  | 1.71131900  |
| H  | 5.69564200  | 1.58772300  | 3.51389100  |
| H  | 3.88521400  | 0.35639800  | 4.64380000  |
| H  | 2.69368300  | -1.49605100 | 3.50108100  |
| H  | 6.41115000  | 0.97745300  | 1.21055100  |
| C  | 3.39776500  | -2.26444000 | 0.73651100  |
| C  | 4.25738900  | -2.10945600 | -0.36596800 |
| N  | 5.14306800  | -1.15247300 | -0.14988800 |
| C  | 2.75720200  | -3.57196200 | 1.05555500  |
| H  | 2.92995600  | -4.27770700 | 0.22687500  |
| H  | 3.19960900  | -4.01517500 | 1.96136600  |
| C  | 1.56503400  | -1.38300200 | 0.07608400  |
| C  | 1.36033600  | -0.11092300 | -0.10409900 |
| H  | 4.26042800  | -2.66818000 | -1.30180300 |
| Au | -0.70295300 | 0.37185800  | -0.02335000 |
| P  | -3.02350800 | 0.73094600  | 0.09190600  |
| C  | -3.50929900 | 2.04796800  | 1.22146700  |
| C  | -4.65079000 | 1.98230200  | 2.01452100  |
| C  | -2.70403600 | 3.18324900  | 1.26762400  |
| C  | -4.98134300 | 3.04663700  | 2.83624500  |
| H  | -5.28943000 | 1.09291300  | 1.98969400  |
| C  | -3.04478300 | 4.24713900  | 2.08170700  |
| H  | -1.79719700 | 3.23094800  | 0.65259800  |
| C  | -4.18230100 | 4.17742000  | 2.86908200  |
| H  | -5.87787900 | 2.99017300  | 3.45954200  |
| H  | -2.40851700 | 5.13578900  | 2.11009100  |
| H  | -4.44738900 | 5.01425400  | 3.52086400  |
| C  | -3.80165500 | 1.10006800  | -1.49160900 |
| C  | -3.24555100 | 0.54346200  | -2.64121900 |
| C  | -4.94739300 | 1.88273900  | -1.59333600 |
| C  | -3.83390900 | 0.75629600  | -3.87447800 |
| H  | -2.33648600 | -0.06671700 | -2.56421500 |
| C  | -5.52617700 | 2.10152000  | -2.83111300 |
| H  | -5.39362600 | 2.32861700  | -0.69863000 |
| C  | -4.97313100 | 1.53902300  | -3.96973100 |
| H  | -3.39196900 | 0.31380100  | -4.77096000 |
| H  | -6.42292200 | 2.72230800  | -2.90619500 |
| H  | -5.43432700 | 1.71694200  | -4.94522500 |
| C  | -3.80386300 | -0.78142700 | 0.69208100  |
| C  | -3.36834400 | -1.27930700 | 1.91944500  |



|   |             |             |             |
|---|-------------|-------------|-------------|
| C | -4.70078300 | -1.52268600 | -0.06853500 |
| C | -3.83709300 | -2.49213100 | 2.38547000  |
| H | -2.64853000 | -0.70505600 | 2.51505500  |
| C | -5.15576900 | -2.74661000 | 0.39692200  |
| H | -5.04711800 | -1.14832400 | -1.03731300 |
| C | -4.72585900 | -3.23234400 | 1.61909300  |
| H | -3.49635500 | -2.87079600 | 3.35301300  |
| H | -5.85980900 | -3.32528500 | -0.20695200 |
| H | -5.08675400 | -4.19872400 | 1.98185400  |
| C | 1.26536000  | -3.38320000 | 1.22934800  |
| H | 0.70850800  | -4.32913300 | 1.19517600  |
| N | 0.84853900  | -2.51091700 | 0.16167800  |
| H | 1.02753800  | -2.87453100 | 2.17898100  |
| S | 0.23102300  | -3.23755300 | -1.25211000 |
| O | 0.52836600  | -2.36107900 | -2.33789300 |
| O | 0.67050300  | -4.59995300 | -1.25793300 |
| C | -1.48246400 | -3.18440400 | -0.91132800 |
| H | -1.69225600 | -3.71557700 | 0.02708700  |
| H | -1.78767900 | -2.13097800 | -0.83705400 |
| H | -2.00686900 | -3.67524600 | -1.74205400 |
| C | 6.08585700  | -0.64630000 | -1.08935700 |
| H | 5.86954100  | 0.40906800  | -1.30869100 |
| H | 7.10544300  | -0.72968300 | -0.68590600 |
| H | 6.02276600  | -1.22509400 | -2.01679500 |
| C | 2.34992400  | 0.97714300  | -0.33599300 |
| H | 2.83265000  | 1.22366800  | 0.63166700  |
| H | 1.80777400  | 1.89733100  | -0.63527800 |
| O | 3.36927900  | 0.68802000  | -1.22686300 |
| H | 2.96349700  | 0.52832600  | -2.08114000 |

### 1-1b-ts

$E_{\text{sol}} = -2487.260938$  Hartree

Thermal correction to Free Energy = 0.502863 Hartree

Sum of electronic and thermal Free Energies = -2486.758075 Hartree

Number of Imaginary Frequencies = 1

|   |             |             |            |
|---|-------------|-------------|------------|
| C | -6.61677100 | -1.30845200 | 2.14371800 |
| C | -6.25642600 | -0.01462000 | 2.52833200 |
| C | -5.50913100 | 0.79926600  | 1.70119200 |
| C | -5.11940100 | 0.31054100  | 0.45669100 |
| C | -5.52055000 | -0.98561200 | 0.08273200 |
| C | -6.25506900 | -1.81750600 | 0.91191600 |
| H | -7.20146200 | -1.92787400 | 2.82883900 |
| H | -6.57501600 | 0.35722600  | 3.50582500 |
| H | -5.23875900 | 1.81212300  | 2.01559700 |

|    |             |             |             |
|----|-------------|-------------|-------------|
| C  | -4.37235700 | 0.84772100  | -0.64511800 |
| C  | -4.42265000 | -0.12860800 | -1.63150200 |
| N  | -5.07515700 | -1.21223600 | -1.19411200 |
| C  | -4.06330800 | 2.28304500  | -0.88756600 |
| H  | -3.75983800 | 2.43035100  | -1.93743200 |
| H  | -4.99111600 | 2.86625200  | -0.75084400 |
| C  | -1.38359200 | 1.15886600  | -0.25437500 |
| C  | -2.11835300 | 0.10900700  | -0.22144500 |
| H  | -4.00853400 | -0.10581700 | -2.63812700 |
| Au | 0.63215800  | 0.31764200  | -0.11887000 |
| P  | 2.78424500  | -0.59403400 | 0.03545700  |
| C  | 4.07219500  | 0.61997500  | -0.30404800 |
| C  | 5.30850400  | 0.25253600  | -0.82982600 |
| C  | 3.81777200  | 1.95698000  | -0.01137700 |
| C  | 6.28050700  | 1.21364500  | -1.04212300 |
| H  | 5.51363700  | -0.79445800 | -1.07743000 |
| C  | 4.79437200  | 2.91275800  | -0.22333000 |
| H  | 2.83312200  | 2.25252700  | 0.37261500  |
| C  | 6.02584300  | 2.54088100  | -0.73750400 |
| H  | 7.24957000  | 0.92106600  | -1.45454900 |
| H  | 4.58764200  | 3.96155700  | 0.00555700  |
| H  | 6.79572200  | 3.29792900  | -0.91103300 |
| C  | 3.12785000  | -1.27714700 | 1.66904200  |
| C  | 2.09989300  | -1.95934000 | 2.31552500  |
| C  | 4.37046300  | -1.16623000 | 2.28412600  |
| C  | 2.31451600  | -2.53375400 | 3.55430500  |
| H  | 1.11483800  | -2.03828700 | 1.83753000  |
| C  | 4.57771500  | -1.73643000 | 3.52871600  |
| H  | 5.18696600  | -0.63033500 | 1.79002800  |
| C  | 3.55431600  | -2.41945600 | 4.16275200  |
| H  | 1.50263100  | -3.06919800 | 4.05381800  |
| H  | 5.55460000  | -1.64361100 | 4.00915300  |
| H  | 3.72268100  | -2.86599700 | 5.14677400  |
| C  | 3.06219100  | -1.94278100 | -1.13344000 |
| C  | 2.50752300  | -1.82544200 | -2.40601700 |
| C  | 3.81860000  | -3.06526100 | -0.81419800 |
| C  | 2.71365500  | -2.81400600 | -3.34945100 |
| H  | 1.90873200  | -0.94144200 | -2.65877000 |
| C  | 4.01766300  | -4.05468500 | -1.76198000 |
| H  | 4.25959700  | -3.16991200 | 0.18255100  |
| C  | 3.46661600  | -3.93120300 | -3.02604400 |
| H  | 2.27608700  | -2.71454800 | -4.34646500 |
| H  | 4.61220600  | -4.93606900 | -1.50638500 |
| H  | 3.62295300  | -4.71774800 | -3.76942300 |

|   |             |             |             |
|---|-------------|-------------|-------------|
| C | -2.20580900 | -1.34132200 | -0.17885100 |
| H | -3.14492900 | -1.65542700 | 0.31007100  |
| H | -1.40853200 | -1.68727400 | 0.51410800  |
| O | -2.14972200 | -1.97654700 | -1.40407500 |
| H | -1.36559200 | -1.65819900 | -1.85890200 |
| C | -3.01836500 | 2.90325500  | 0.00565200  |
| H | -3.05692200 | 3.99443700  | -0.09834200 |
| N | -1.68530000 | 2.48067900  | -0.37537200 |
| H | -3.19935900 | 2.64620100  | 1.06898100  |
| S | -0.43359700 | 3.57020200  | -0.19178100 |
| O | 0.65399300  | 3.05379000  | -0.96456100 |
| O | -0.98845000 | 4.85206100  | -0.48196100 |
| C | -0.00992900 | 3.49290200  | 1.50392500  |
| H | -0.87035700 | 3.80486700  | 2.11057100  |
| H | 0.28760500  | 2.46597900  | 1.76376800  |
| H | 0.82945200  | 4.17766800  | 1.68041100  |
| C | -5.23213300 | -2.43708200 | -1.90323000 |
| H | -4.72652500 | -3.26274600 | -1.37969800 |
| H | -6.29862000 | -2.68591700 | -2.00822800 |
| H | -4.79213700 | -2.33640600 | -2.90097100 |
| H | -6.54445300 | -2.82539900 | 0.60321100  |

### 1-2a

$E_{\text{sol}} = -3092.058716$  Hartree

Thermal correction to Free Energy = 0.509411 Hartree

Sum of electronic and thermal Free Energies = -3091.549305 Hartree

Number of Imaginary Frequencies = 0

|   |             |             |             |
|---|-------------|-------------|-------------|
| C | -6.50665900 | -0.16972900 | -3.08224400 |
| C | -5.55971900 | -1.16847500 | -3.26314500 |
| C | -4.72710100 | -1.56812400 | -2.22613100 |
| C | -4.86197100 | -0.94346700 | -1.00603500 |
| C | -5.81487400 | 0.05032200  | -0.85072800 |
| C | -6.65517100 | 0.46690100  | -1.85890300 |
| H | -7.14295800 | 0.12827700  | -3.91891400 |
| H | -5.46367900 | -1.64320900 | -4.24303500 |
| H | -3.96974900 | -2.34223000 | -2.38226700 |
| H | -7.39366900 | 1.25849900  | -1.71311200 |
| C | -4.15829200 | -1.13395100 | 0.30416600  |
| C | -4.78660400 | -0.06568800 | 1.10318300  |
| N | -5.73570300 | 0.52797000  | 0.46481600  |
| C | -4.46004200 | -2.50065700 | 0.96188000  |
| H | -4.58176100 | -2.37632300 | 2.05095300  |
| H | -5.37564500 | -2.95929900 | 0.56325400  |
| C | -2.61244900 | -1.10907900 | 0.25204200  |

|    |             |             |             |
|----|-------------|-------------|-------------|
| C  | -1.81479800 | -0.24179700 | -0.37603700 |
| H  | -4.55393400 | 0.19092100  | 2.13931300  |
| Au | 0.23831300  | -0.52433900 | -0.41715700 |
| P  | 2.56147500  | -0.99570700 | -0.42174800 |
| C  | 3.50064100  | -0.25898400 | -1.77909100 |
| C  | 4.34373500  | -0.99420200 | -2.60489000 |
| C  | 3.35980400  | 1.11288700  | -1.98599900 |
| C  | 5.03624400  | -0.36395900 | -3.62572700 |
| H  | 4.46506500  | -2.07140900 | -2.45182200 |
| C  | 4.06148300  | 1.73659500  | -3.00011300 |
| H  | 2.69762800  | 1.69862500  | -1.33889800 |
| C  | 4.89804400  | 0.99912700  | -3.82339000 |
| H  | 5.69636700  | -0.94869500 | -4.27272000 |
| H  | 3.94865600  | 2.81345500  | -3.15208000 |
| H  | 5.44637900  | 1.49354000  | -4.63037500 |
| C  | 3.46417800  | -0.51930700 | 1.06918800  |
| C  | 2.78842000  | -0.49632000 | 2.28646500  |
| C  | 4.81995500  | -0.20662600 | 1.03306400  |
| C  | 3.46442100  | -0.17829700 | 3.45106700  |
| H  | 1.71339600  | -0.71353300 | 2.31861900  |
| C  | 5.49051400  | 0.11695800  | 2.19975000  |
| H  | 5.36072700  | -0.21565200 | 0.08093800  |
| C  | 4.81459900  | 0.12931500  | 3.40862800  |
| H  | 2.92566500  | -0.15597600 | 4.40195400  |
| H  | 6.55449200  | 0.36660000  | 2.16197100  |
| H  | 5.34488300  | 0.38969500  | 4.32884700  |
| C  | 2.82219900  | -2.78045200 | -0.57110300 |
| C  | 2.02091300  | -3.47885500 | -1.47491100 |
| C  | 3.75438000  | -3.48055000 | 0.18819600  |
| C  | 2.16129800  | -4.84603600 | -1.62621000 |
| H  | 1.27469800  | -2.93676200 | -2.06870600 |
| C  | 3.88200400  | -4.85252700 | 0.04328700  |
| H  | 4.39027600  | -2.95429000 | 0.90667600  |
| C  | 3.08990900  | -5.53674700 | -0.86262300 |
| H  | 1.53092100  | -5.37989600 | -2.34220600 |
| H  | 4.61386200  | -5.39278500 | 0.64973800  |
| H  | 3.19240700  | -6.62003000 | -0.97212800 |
| C  | -2.41391400 | 1.00642200  | -0.95251800 |
| H  | -3.00601400 | 0.74654500  | -1.85540600 |
| H  | -1.62121500 | 1.68970900  | -1.30120500 |
| O  | -3.28616200 | 1.68187200  | -0.09139700 |
| H  | -2.71674000 | 2.12146800  | 0.54608900  |
| C  | -3.19872400 | -3.28831700 | 0.69730100  |
| H  | -3.07437700 | -4.13937400 | 1.37935800  |

|    |             |             |             |
|----|-------------|-------------|-------------|
| N  | -2.13951000 | -2.31594000 | 0.83922600  |
| H  | -3.16990100 | -3.66880500 | -0.33858200 |
| S  | -1.45823700 | -2.25173700 | 2.37640100  |
| O  | -1.02792200 | -0.91052200 | 2.62772500  |
| O  | -2.32150300 | -2.90544000 | 3.32381800  |
| C  | -0.06160000 | -3.27210000 | 2.13253200  |
| H  | -0.38815400 | -4.27850500 | 1.84027400  |
| H  | 0.56072500  | -2.83684200 | 1.33799800  |
| H  | 0.49638900  | -3.32730800 | 3.07629100  |
| C  | -6.51016700 | 1.62749600  | 0.94453700  |
| H  | -6.28934000 | 1.79314900  | 2.00293900  |
| H  | -6.25837000 | 2.52964400  | 0.36897400  |
| H  | -7.57932700 | 1.40975800  | 0.82200400  |
| Sb | 0.62064000  | 3.57946100  | 0.38762500  |
| F  | 0.46973600  | 2.81397000  | -1.28659800 |
| F  | 2.03040100  | 4.58333500  | -0.23431800 |
| F  | -0.57321400 | 4.88232200  | -0.12521900 |
| F  | -0.79609900 | 2.55820900  | 1.01377300  |
| F  | 0.76948800  | 4.35402400  | 2.04858400  |
| F  | 1.79189500  | 2.25286600  | 0.90079400  |

### 1-2b

$E_{\text{sol}} = -3092.074708$  Hartree

Thermal correction to Free Energy = 0.510612 Hartree

Sum of electronic and thermal Free Energies = -3091.564096 Hartree

Number of Imaginary Frequencies = 0

|   |            |             |             |
|---|------------|-------------|-------------|
| C | 7.12446500 | -1.20072200 | 2.50772500  |
| C | 6.25876200 | -2.23368000 | 2.17875800  |
| C | 5.23054100 | -2.04757200 | 1.26263600  |
| C | 5.09332400 | -0.81076600 | 0.67056100  |
| C | 5.96440000 | 0.20704000  | 1.03152800  |
| C | 6.98933500 | 0.05635200  | 1.93715200  |
| H | 7.91869300 | -1.37283000 | 3.23812000  |
| H | 6.38116000 | -3.20848800 | 2.65806000  |
| H | 4.53596300 | -2.86128700 | 1.03572100  |
| C | 4.11238600 | -0.26908200 | -0.33649900 |
| C | 4.54114200 | 1.15327400  | -0.37686800 |
| N | 5.59375700 | 1.36928900  | 0.33659700  |
| C | 4.30043800 | -0.83167500 | -1.75158200 |
| H | 3.92382300 | -0.10052300 | -2.48707000 |
| H | 5.36702300 | -0.99917800 | -1.96282100 |
| C | 1.71469100 | -1.06764100 | -0.64457000 |
| C | 2.65226400 | -0.39140900 | 0.05751300  |
| H | 4.12142000 | 1.93248800  | -1.01450000 |

|    |             |             |             |
|----|-------------|-------------|-------------|
| Au | -0.31598600 | -0.90504700 | -0.10791700 |
| P  | -2.56981100 | -0.78710100 | 0.58029300  |
| C  | -3.39187200 | -2.39785900 | 0.44078700  |
| C  | -4.74655000 | -2.53834700 | 0.15115900  |
| C  | -2.62593700 | -3.53885300 | 0.67031600  |
| C  | -5.31797300 | -3.79781500 | 0.08814900  |
| H  | -5.36373200 | -1.65414900 | -0.03773500 |
| C  | -3.20215100 | -4.79560000 | 0.61682300  |
| H  | -1.55777100 | -3.43375400 | 0.89929800  |
| C  | -4.54924200 | -4.92626300 | 0.32096300  |
| H  | -6.38094300 | -3.89735800 | -0.14763600 |
| H  | -2.59051400 | -5.68303300 | 0.80075300  |
| H  | -5.00450500 | -5.91897300 | 0.26685000  |
| C  | -2.81781800 | -0.32776700 | 2.31126000  |
| C  | -1.71508500 | -0.02424900 | 3.09999700  |
| C  | -4.09089500 | -0.30929700 | 2.88014600  |
| C  | -1.87733700 | 0.29636100  | 4.43765100  |
| H  | -0.71409200 | -0.04173200 | 2.65454200  |
| C  | -4.25051600 | 0.01461200  | 4.21454800  |
| H  | -4.96918200 | -0.54771800 | 2.26899500  |
| C  | -3.14424200 | 0.31643800  | 4.99412600  |
| H  | -1.00281700 | 0.53476600  | 5.04919000  |
| H  | -5.25172500 | 0.02946700  | 4.65314300  |
| H  | -3.27365300 | 0.56972600  | 6.04988900  |
| C  | -3.59585900 | 0.33860900  | -0.38642600 |
| C  | -3.84869000 | 0.01149900  | -1.71782800 |
| C  | -4.02647100 | 1.56303900  | 0.10800100  |
| C  | -4.54934300 | 0.88198700  | -2.52977800 |
| H  | -3.48799200 | -0.93997500 | -2.12620700 |
| C  | -4.72318900 | 2.43492600  | -0.71270100 |
| H  | -3.80767100 | 1.85318900  | 1.13989800  |
| C  | -4.98939600 | 2.09637700  | -2.02696400 |
| H  | -4.74594600 | 0.61225200  | -3.57111700 |
| H  | -5.05363600 | 3.39865400  | -0.31621100 |
| H  | -5.53661800 | 2.79024900  | -2.67083200 |
| C  | 2.34109600  | 0.39968500  | 1.28092900  |
| H  | 2.88398500  | -0.00642200 | 2.15851000  |
| H  | 1.25946600  | 0.33182000  | 1.51011800  |
| O  | 2.76344600  | 1.72938300  | 1.18026200  |
| H  | 2.16006000  | 2.15087400  | 0.55734000  |
| C  | 3.52899200  | -2.10594200 | -1.91040300 |
| H  | 3.70207400  | -2.51918600 | -2.91125900 |
| N  | 2.12261900  | -1.81256800 | -1.75686000 |
| H  | 3.86374500  | -2.86156400 | -1.16725300 |

|    |             |             |             |
|----|-------------|-------------|-------------|
| S  | 1.09788400  | -2.98012200 | -2.33624200 |
| O  | -0.18303100 | -2.38248000 | -2.56079400 |
| O  | 1.78728900  | -3.61062700 | -3.42112300 |
| C  | 0.94504500  | -4.14030900 | -1.03049600 |
| H  | 1.92295700  | -4.60023900 | -0.83284000 |
| H  | 0.57443200  | -3.62875000 | -0.13120900 |
| H  | 0.23023900  | -4.91374800 | -1.33993300 |
| C  | 6.24911000  | 2.62733500  | 0.51200700  |
| H  | 6.12760300  | 2.96122500  | 1.55186000  |
| H  | 7.31942600  | 2.52157700  | 0.29199500  |
| H  | 5.80755400  | 3.36631600  | -0.16338600 |
| H  | 7.65679200  | 0.87844700  | 2.20452300  |
| Sb | -0.56373500 | 3.29471500  | -0.63686900 |
| F  | 0.30643500  | 4.48198500  | 0.47027500  |
| F  | -2.13881800 | 4.21592000  | -0.42867700 |
| F  | -0.11786300 | 4.32789100  | -2.09145800 |
| F  | 1.05364400  | 2.38377100  | -0.82711000 |
| F  | -1.35756600 | 2.07111800  | -1.75447500 |
| F  | -0.94339000 | 2.24944900  | 0.83542400  |

### 1-3a

$E_{\text{sol}} = -1315.608984$  Hartree

Thermal correction to Free Energy = 0.266412 Hartree

Sum of electronic and thermal Free Energies = -1315.342572 Hartree

Number of Imaginary Frequencies = 0

|   |             |             |             |
|---|-------------|-------------|-------------|
| C | 3.06121000  | 2.67225200  | -0.57911000 |
| C | 1.72065100  | 3.00928700  | -0.47063300 |
| C | 0.79434100  | 2.05075900  | -0.05975200 |
| C | 1.22937000  | 0.78153100  | 0.25401400  |
| C | 2.58384600  | 0.45381400  | 0.14120700  |
| C | 3.51586200  | 1.39172400  | -0.28557300 |
| H | 3.78084600  | 3.42596300  | -0.91706600 |
| H | 1.38728600  | 4.02094600  | -0.71770900 |
| H | -0.27050700 | 2.30794000  | -0.00655200 |
| H | 4.57318100  | 1.13385600  | -0.39515500 |
| C | 0.48035100  | -0.44357300 | 0.72524800  |
| C | 1.55566800  | -1.55549500 | 0.60815800  |
| N | 2.79665800  | -0.84146800 | 0.51633600  |
| C | -0.14068100 | -0.29365900 | 2.11267300  |
| H | -0.25700800 | -1.29321600 | 2.56798900  |
| H | 0.45653900  | 0.33083700  | 2.79270600  |
| C | -0.71647900 | -0.74160900 | -0.13127400 |
| C | -0.56850200 | -1.33428200 | -1.31513600 |
| H | 1.56287900  | -2.20691700 | 1.50356200  |

|   |             |             |             |
|---|-------------|-------------|-------------|
| C | 0.81539600  | -1.81105800 | -1.59639700 |
| H | 1.49656400  | -1.00514300 | -1.95638800 |
| H | 0.81135200  | -2.58594800 | -2.37954400 |
| O | 1.35957100  | -2.42602900 | -0.44988100 |
| C | -1.50365600 | 0.29496700  | 1.83225100  |
| H | -2.25300200 | 0.04278700  | 2.59560700  |
| N | -1.84986100 | -0.33448800 | 0.56622600  |
| H | -1.46805400 | 1.40062900  | 1.74503900  |
| S | -3.25721200 | 0.07514800  | -0.18221200 |
| O | -3.57558600 | -0.97553200 | -1.09625400 |
| O | -4.15523200 | 0.43218600  | 0.86983000  |
| C | -2.87428700 | 1.51251900  | -1.11285500 |
| H | -2.61276800 | 2.33438900  | -0.43189400 |
| H | -2.04456500 | 1.29537400  | -1.80086000 |
| H | -3.76756300 | 1.78783000  | -1.69110600 |
| C | 3.97219100  | -1.54863500 | 0.14992200  |
| H | 3.94673900  | -2.55356800 | 0.59606000  |
| H | 4.09182000  | -1.66759200 | -0.94752000 |
| H | 4.86834600  | -1.03561700 | 0.53596700  |
| H | -1.39598900 | -1.57948700 | -1.98168200 |

### 1-3b

$E_{\text{sol}} = -1315.611088$  Hartree

Thermal correction to Free Energy = 0.265910 Hartree

Sum of electronic and thermal Free Energies = -1315.345178 Hartree

Number of Imaginary Frequencies = 0

|   |             |             |             |
|---|-------------|-------------|-------------|
| C | 3.33055600  | 2.68198500  | -0.37031900 |
| C | 1.98982100  | 2.92707600  | -0.62370300 |
| C | 1.04835100  | 1.91678100  | -0.43149700 |
| C | 1.46796200  | 0.68651900  | 0.02416800  |
| C | 2.82587100  | 0.44655400  | 0.26205500  |
| C | 3.77448000  | 1.43780100  | 0.06633100  |
| H | 4.06461800  | 3.47817300  | -0.53589300 |
| H | 1.67261900  | 3.90828000  | -0.98871300 |
| H | -0.00967100 | 2.09460600  | -0.66609800 |
| C | 0.70601500  | -0.57814600 | 0.35092500  |
| C | 1.85911900  | -1.58280000 | 0.32089200  |
| N | 3.01019800  | -0.84574300 | 0.70153900  |
| C | -0.09306500 | -0.51310700 | 1.64086600  |
| H | -0.30209500 | -1.54171600 | 1.98840800  |
| H | 0.46334600  | 0.00206900  | 2.44054400  |
| C | -1.49086500 | -1.08156400 | -0.66651100 |
| C | -0.16190400 | -1.10986100 | -0.73128200 |
| H | 1.72128600  | -2.46801500 | 0.97853300  |



|   |             |             |             |
|---|-------------|-------------|-------------|
| C | 0.70703200  | -1.89051600 | -1.65831000 |
| H | 0.85893900  | -1.39771200 | -2.63974100 |
| H | 0.29658800  | -2.90175800 | -1.86504400 |
| O | 1.95704800  | -1.97315000 | -1.02862300 |
| C | -1.39470600 | 0.21023100  | 1.40507000  |
| H | -1.99707900 | 0.25144500  | 2.32427400  |
| N | -2.17102100 | -0.48822300 | 0.39561800  |
| H | -1.18711600 | 1.25724300  | 1.09565000  |
| S | -3.65994200 | 0.14077600  | 0.05434400  |
| O | -4.31462700 | -0.80578500 | -0.79356900 |
| O | -4.22597700 | 0.51779400  | 1.31094300  |
| C | -3.35158600 | 1.59291900  | -0.88222400 |
| H | -2.81697000 | 2.33100200  | -0.26858400 |
| H | -2.76663700 | 1.33617400  | -1.77695900 |
| H | -4.32005300 | 2.01244600  | -1.18783800 |
| C | 4.28979900  | -1.46541200 | 0.62016900  |
| H | 4.68735600  | -1.52400800 | -0.41357400 |
| H | 5.01968300  | -0.91619400 | 1.23640500  |
| H | 4.22276300  | -2.48725600 | 1.02233600  |
| H | 4.83979100  | 1.25099100  | 0.23167200  |
| H | -2.13537500 | -1.58206100 | -1.39475100 |

## 2-1

$E_{\text{sol}} = -3169.846158$  Hartree

Thermal correction to Free Energy = 0.757478 Hartree

Sum of electronic and thermal Free Energies = -3169.088680 Hartree

Number of Imaginary Frequencies: 0

|   |            |             |             |
|---|------------|-------------|-------------|
| C | 6.02873900 | -0.22414300 | -1.01733600 |
| C | 6.02149100 | -0.73886800 | 0.28484200  |
| C | 5.21682200 | -1.80710100 | 0.62729900  |
| C | 4.39848100 | -2.37729300 | -0.35018300 |
| C | 4.41636800 | -1.83105300 | -1.65375200 |
| C | 5.22837300 | -0.76222300 | -2.00618300 |
| H | 6.68158200 | 0.62091900  | -1.25704400 |
| H | 6.66765300 | -0.28282000 | 1.04098800  |
| H | 5.22788900 | -2.20418600 | 1.64815000  |
| C | 3.46420700 | -3.45355500 | -0.36877100 |
| C | 2.96426700 | -3.49556500 | -1.63981100 |
| N | 3.52831100 | -2.52578700 | -2.40812500 |
| C | 3.02548800 | -4.27226200 | 0.78357900  |
| H | 2.48572900 | -5.16949100 | 0.43755300  |
| H | 3.89080700 | -4.63311300 | 1.36868400  |
| C | 0.84270000 | -1.89457200 | 0.49667900  |
| C | 1.32147400 | -0.89279400 | -0.03989600 |

|    |             |             |             |
|----|-------------|-------------|-------------|
| H  | 2.22116600  | -4.16467400 | -2.07286200 |
| Au | -1.08381500 | -0.62852900 | 0.07404300  |
| P  | -3.12038100 | 0.45559100  | -0.29066500 |
| C  | -2.86175900 | 2.07798600  | -1.03762000 |
| C  | -3.60953300 | 3.19034900  | -0.66655000 |
| C  | -1.86417400 | 2.20895200  | -2.00043300 |
| C  | -3.35308800 | 4.42028800  | -1.24958200 |
| H  | -4.39673600 | 3.10235000  | 0.08908900  |
| C  | -1.61696300 | 3.43760400  | -2.58409200 |
| H  | -1.26216600 | 1.33645500  | -2.28584000 |
| C  | -2.35714500 | 4.54645900  | -2.20335300 |
| H  | -3.94223500 | 5.29194900  | -0.95163000 |
| H  | -0.82954800 | 3.53200700  | -3.33734600 |
| H  | -2.15440200 | 5.52037500  | -2.65728300 |
| C  | -4.21528200 | -0.44941900 | -1.39510000 |
| C  | -4.09344400 | -1.83326100 | -1.48103300 |
| C  | -5.18276200 | 0.20963700  | -2.14943900 |
| C  | -4.93550200 | -2.55232300 | -2.31094300 |
| H  | -3.32597500 | -2.35048800 | -0.89206800 |
| C  | -6.01877400 | -0.51515200 | -2.97942100 |
| H  | -5.28067600 | 1.29878000  | -2.09080700 |
| C  | -5.89524600 | -1.89297200 | -3.06119900 |
| H  | -4.83449500 | -3.63865800 | -2.37760000 |
| H  | -6.77408100 | 0.00441800  | -3.57441100 |
| H  | -6.55389200 | -2.46017900 | -3.72445900 |
| C  | -4.02769800 | 0.74727600  | 1.23914600  |
| C  | -3.35233900 | 1.36972700  | 2.28824900  |
| C  | -5.35248800 | 0.36118400  | 1.40538200  |
| C  | -4.00120100 | 1.61387200  | 3.48334400  |
| H  | -2.30402000 | 1.67279100  | 2.16244700  |
| C  | -5.99310600 | 0.59789900  | 2.61113000  |
| H  | -5.89342500 | -0.13000400 | 0.59078700  |
| C  | -5.32239500 | 1.22368700  | 3.64636800  |
| H  | -3.46880000 | 2.10938600  | 4.29962500  |
| H  | -7.03383300 | 0.28923800  | 2.73761200  |
| H  | -5.83283100 | 1.40905400  | 4.59515800  |
| C  | 2.13195600  | -3.51287600 | 1.73905600  |
| H  | 1.86007200  | -4.13956600 | 2.60347800  |
| N  | 0.89176800  | -3.08424900 | 1.08933300  |
| H  | 2.62682700  | -2.60708800 | 2.12875100  |
| S  | -0.52570100 | -3.90199900 | 1.43368500  |
| O  | -1.44996600 | -3.53097400 | 0.40827600  |
| O  | -0.13632600 | -5.25749600 | 1.63375600  |
| C  | -1.04717300 | -3.21476300 | 2.95092500  |

|    |             |             |             |
|----|-------------|-------------|-------------|
| H  | -0.27354100 | -3.37772400 | 3.71223700  |
| H  | -1.23961600 | -2.14067200 | 2.81974900  |
| H  | -1.97335100 | -3.72101900 | 3.25376700  |
| C  | 3.26459400  | -2.28693400 | -3.78282400 |
| H  | 2.98423900  | -1.23320100 | -3.95059100 |
| H  | 4.14162000  | -2.51371400 | -4.41100400 |
| H  | 2.43180500  | -2.92089400 | -4.11007500 |
| C  | 1.85644100  | 0.28934300  | -0.64346700 |
| C  | 1.61635600  | 0.54237600  | -1.93994000 |
| H  | 1.04453900  | -0.17862100 | -2.52527900 |
| H  | 5.23995700  | -0.36080800 | -3.02383100 |
| O  | 2.57956300  | 1.00689000  | 0.19129600  |
| H  | 1.97085300  | 1.45107300  | -2.42888900 |
| Si | 2.79826100  | 2.63956100  | 0.55141800  |
| C  | 1.27348100  | 3.53316400  | -0.04706700 |
| C  | 2.91733600  | 2.55060000  | 2.40918600  |
| C  | 4.41028300  | 3.13045500  | -0.24321200 |
| H  | 1.08969000  | 3.16236800  | -1.07885800 |
| C  | 0.06311900  | 3.14488900  | 0.78309000  |
| C  | 1.40071400  | 5.03980000  | -0.14308400 |
| H  | 2.02508200  | 1.95131200  | 2.69687300  |
| C  | 4.14042900  | 1.76582400  | 2.84218000  |
| C  | 2.83002600  | 3.86903800  | 3.15233900  |
| H  | 5.10400600  | 2.31867000  | 0.06868600  |
| C  | 5.00097800  | 4.43141400  | 0.26503600  |
| C  | 4.35885600  | 3.11240300  | -1.75715900 |
| H  | 0.15161000  | 3.48236600  | 1.83037800  |
| H  | -0.85929400 | 3.60178600  | 0.38228000  |
| H  | -0.10114100 | 2.05056700  | 0.80753100  |
| H  | 0.45726200  | 5.48767500  | -0.50630200 |
| H  | 1.61674600  | 5.50999700  | 0.83192600  |
| H  | 2.19355000  | 5.35416300  | -0.84020700 |
| H  | 5.07389100  | 2.31324400  | 2.62084200  |
| H  | 4.13489500  | 1.57987300  | 3.93044700  |
| H  | 4.21483800  | 0.78338200  | 2.34333800  |
| H  | 1.90902600  | 4.43074300  | 2.92739700  |
| H  | 2.84504400  | 3.70672700  | 4.24445000  |
| H  | 3.67633500  | 4.53939400  | 2.92755600  |
| H  | 5.95548100  | 4.65044400  | -0.24495800 |
| H  | 4.34572900  | 5.30118300  | 0.08676100  |
| H  | 5.22054000  | 4.40332800  | 1.34377900  |
| H  | 3.63361300  | 3.84250300  | -2.16053900 |
| H  | 5.34038700  | 3.37462500  | -2.19066400 |
| H  | 4.09011300  | 2.12212100  | -2.15940500 |

**2-1a-ts** $E_{\text{sol}} = -3169.843099$  Hartree

Thermal correction to Free Energy = 0.764925 Hartree

Sum of electronic and thermal Free Energies = -3169.078174 Hartree

Number of Imaginary Frequencies: 1

|    |             |             |             |
|----|-------------|-------------|-------------|
| C  | -4.84538100 | -1.15652900 | 2.45020700  |
| C  | -3.96267400 | -0.35611900 | 3.17490200  |
| C  | -3.55272300 | 0.87651600  | 2.69770600  |
| C  | -4.04595100 | 1.31257700  | 1.47677600  |
| C  | -4.93314700 | 0.49071900  | 0.77081200  |
| C  | -5.34765800 | -0.74563200 | 1.22866400  |
| H  | -5.14675600 | -2.12671000 | 2.85404300  |
| H  | -3.58826900 | -0.71326200 | 4.13830200  |
| H  | -2.85167600 | 1.49059300  | 3.27186700  |
| H  | -6.03424700 | -1.37343700 | 0.65455600  |
| C  | -3.78522300 | 2.46934300  | 0.64299100  |
| C  | -4.59107900 | 2.26828600  | -0.49043000 |
| N  | -5.26319800 | 1.12691700  | -0.40421400 |
| C  | -3.43088300 | 3.83564100  | 1.12484400  |
| H  | -3.75758000 | 4.58166000  | 0.38161700  |
| H  | -3.95266300 | 4.06582400  | 2.06675200  |
| C  | -1.80245800 | 2.10447500  | -0.09263400 |
| C  | -1.38928000 | 0.93314400  | -0.46695900 |
| H  | -4.73124700 | 2.92973100  | -1.34566000 |
| Au | 0.67188500  | 0.56081400  | -0.08152000 |
| P  | 2.93710900  | -0.01216800 | 0.21712900  |
| C  | 3.42034300  | -1.25974800 | -0.99164900 |
| C  | 3.65151800  | -2.58356200 | -0.63200100 |
| C  | 3.43962600  | -0.90381200 | -2.33956000 |
| C  | 3.91185300  | -3.53315000 | -1.60758000 |
| H  | 3.62212500  | -2.88565000 | 0.42039900  |
| C  | 3.71135300  | -1.85255300 | -3.30718200 |
| H  | 3.23774200  | 0.13303700  | -2.63398300 |
| C  | 3.94676300  | -3.17006000 | -2.94227000 |
| H  | 4.09124300  | -4.57109100 | -1.31405800 |
| H  | 3.73288400  | -1.56158200 | -4.36098700 |
| H  | 4.15316800  | -3.92097300 | -3.70966700 |
| C  | 4.07184000  | 1.37769100  | -0.00081600 |
| C  | 3.67925700  | 2.60528100  | 0.52793700  |
| C  | 5.31190800  | 1.26774600  | -0.62350400 |
| C  | 4.50987500  | 3.70642100  | 0.43789700  |
| H  | 2.70444600  | 2.69417500  | 1.02357100  |
| C  | 6.14001500  | 2.37394900  | -0.71332600 |

|    |             |             |             |
|----|-------------|-------------|-------------|
| H  | 5.63783100  | 0.30985400  | -1.04148300 |
| C  | 5.74113300  | 3.59156300  | -0.18749500 |
| H  | 4.19187000  | 4.66501400  | 0.85704600  |
| H  | 7.11277000  | 2.28143300  | -1.20395800 |
| H  | 6.39826100  | 4.46171900  | -0.26600300 |
| C  | 3.34215300  | -0.70561900 | 1.82995700  |
| C  | 2.32071900  | -0.95750400 | 2.73890500  |
| C  | 4.65945300  | -1.00292800 | 2.17343300  |
| C  | 2.60862100  | -1.51355200 | 3.97503000  |
| H  | 1.28676600  | -0.70774200 | 2.46851900  |
| C  | 4.94236200  | -1.55580800 | 3.40805400  |
| H  | 5.47225600  | -0.80638000 | 1.46485400  |
| C  | 3.91802400  | -1.81294000 | 4.30776000  |
| H  | 1.80000400  | -1.70875500 | 4.68487800  |
| H  | 5.97696000  | -1.78912200 | 3.67407800  |
| H  | 4.14778100  | -2.25032200 | 5.28311600  |
| C  | -1.93260100 | 3.95490600  | 1.31077800  |
| H  | -1.59378900 | 4.99481700  | 1.39539500  |
| N  | -1.34081100 | 3.32313100  | 0.15919100  |
| H  | -1.59059700 | 3.40232400  | 2.20257800  |
| S  | -0.80432800 | 4.29299900  | -1.14529300 |
| O  | -1.10940600 | 3.58946500  | -2.34748100 |
| O  | -1.30512700 | 5.60990800  | -0.90459100 |
| C  | 0.91732900  | 4.25438200  | -0.87197000 |
| H  | 1.13583400  | 4.68026800  | 0.11571900  |
| H  | 1.24893900  | 3.20772600  | -0.93260200 |
| H  | 1.40172700  | 4.85107700  | -1.65596200 |
| C  | -2.15476700 | -0.18938400 | -0.98780900 |
| C  | -2.82265200 | -0.11606300 | -2.14569100 |
| H  | -2.86776500 | 0.83085700  | -2.68380300 |
| C  | -6.05333400 | 0.54525600  | -1.43261100 |
| H  | -6.22894400 | 1.28557400  | -2.22084500 |
| H  | -5.53520400 | -0.32582000 | -1.87096200 |
| H  | -7.02144700 | 0.21627100  | -1.03011200 |
| H  | -3.31840800 | -0.98623000 | -2.58044900 |
| O  | -2.04005800 | -1.28274000 | -0.24171400 |
| Si | -1.63306300 | -2.88682300 | -0.47591900 |
| C  | -1.12687500 | -3.17123500 | -2.25118200 |
| C  | -0.22726700 | -3.08458600 | 0.74281800  |
| C  | -3.17447500 | -3.79797000 | 0.04228600  |
| H  | -1.92588800 | -2.72408900 | -2.87810300 |
| C  | 0.16623700  | -2.45814800 | -2.59301000 |
| C  | -1.04790500 | -4.63998500 | -2.62299800 |
| H  | 0.44644200  | -2.23051100 | 0.49372500  |

|   |             |             |             |
|---|-------------|-------------|-------------|
| C | -0.72599400 | -2.85515400 | 2.15792900  |
| C | 0.60622600  | -4.34555900 | 0.66180300  |
| H | -3.47196800 | -3.27199700 | 0.97659200  |
| C | -3.00600000 | -5.26419900 | 0.38538300  |
| C | -4.29763300 | -3.59778700 | -0.95527900 |
| H | 0.41509000  | -2.56688500 | -3.66370700 |
| H | 0.12809000  | -1.37372500 | -2.38409800 |
| H | 1.01902200  | -2.87069000 | -2.02647200 |
| H | -0.70814700 | -4.76450400 | -3.66649400 |
| H | -0.33542500 | -5.20153400 | -1.99403100 |
| H | -2.02161300 | -5.14962900 | -2.54435800 |
| H | -1.41239900 | -3.65520300 | 2.48762100  |
| H | 0.10772000  | -2.84569900 | 2.88333100  |
| H | -1.26850300 | -1.89817200 | 2.26507800  |
| H | 1.08850900  | -4.47594200 | -0.32090500 |
| H | 1.41484100  | -4.32631200 | 1.41667500  |
| H | 0.01788400  | -5.25861000 | 0.85857900  |
| H | -3.95645500 | -5.69963000 | 0.74205000  |
| H | -2.69350300 | -5.86956500 | -0.48292000 |
| H | -2.26183500 | -5.43273500 | 1.18037500  |
| H | -4.09195600 | -4.10700200 | -1.91402800 |
| H | -5.25268100 | -4.00807700 | -0.58099000 |
| H | -4.47371600 | -2.53193100 | -1.18403500 |

## 2-1b-ts

$E_{\text{sol}} = -3169.829644$  Hartree

Thermal correction to Free Energy = 0.758764 Hartree

Sum of electronic and thermal Free Energies = -3169.070880 Hartree

Number of Imaginary Frequencies: 1

|   |            |             |             |
|---|------------|-------------|-------------|
| C | 6.58388100 | -0.20673700 | -0.75856100 |
| C | 6.32464800 | -0.79820400 | 0.47989500  |
| C | 5.25884400 | -1.65955700 | 0.65579100  |
| C | 4.43768500 | -1.93120100 | -0.43341000 |
| C | 4.72593300 | -1.33103400 | -1.67021900 |
| C | 5.78732900 | -0.46343400 | -1.85882100 |
| H | 7.43454000 | 0.47211400  | -0.86050900 |
| H | 6.98212200 | -0.57463900 | 1.32463200  |
| H | 5.06782600 | -2.12134700 | 1.63006800  |
| C | 3.28872600 | -2.77161300 | -0.63118400 |
| C | 3.00870500 | -2.67776100 | -1.99699600 |
| N | 3.82253500 | -1.80813000 | -2.59014500 |
| C | 2.88713900 | -3.92748700 | 0.22494800  |
| H | 2.47743800 | -4.72835800 | -0.41291600 |
| H | 3.79442400 | -4.34071400 | 0.69893800  |

|    |             |             |             |
|----|-------------|-------------|-------------|
| C  | 0.53099000  | -1.99416900 | 0.26133200  |
| C  | 1.46486100  | -1.32627500 | -0.32746800 |
| H  | 2.23532400  | -3.18951800 | -2.56930400 |
| Au | -1.24662200 | -0.78421000 | 0.05033500  |
| P  | -3.15295400 | 0.53207100  | -0.33726700 |
| C  | -2.73084300 | 2.09468600  | -1.13707100 |
| C  | -3.38982600 | 3.28376800  | -0.83859600 |
| C  | -1.66266500 | 2.10651900  | -2.03160300 |
| C  | -2.97401700 | 4.46962300  | -1.42128800 |
| H  | -4.22681800 | 3.28800800  | -0.13268800 |
| C  | -1.25591100 | 3.29195900  | -2.61628800 |
| H  | -1.12653200 | 1.17437300  | -2.25368400 |
| C  | -1.90595900 | 4.47638300  | -2.30411700 |
| H  | -3.49050600 | 5.40202600  | -1.17868700 |
| H  | -0.41258500 | 3.29347000  | -3.31292000 |
| H  | -1.57475600 | 5.41663700  | -2.75342300 |
| C  | -4.35806200 | -0.28878200 | -1.39616500 |
| C  | -4.47480200 | -1.67390300 | -1.30659100 |
| C  | -5.17770000 | 0.41850600  | -2.27146500 |
| C  | -5.41014500 | -2.34283400 | -2.07562300 |
| H  | -3.82070300 | -2.23353700 | -0.62572400 |
| C  | -6.10560500 | -0.25815200 | -3.04449800 |
| H  | -5.09118300 | 1.50742300  | -2.35145200 |
| C  | -6.22366200 | -1.63478600 | -2.94564500 |
| H  | -5.49726500 | -3.42995500 | -2.00098000 |
| H  | -6.74477000 | 0.29900700  | -3.73442800 |
| H  | -6.95577500 | -2.16415000 | -3.56100400 |
| C  | -4.03031800 | 0.97856500  | 1.17619000  |
| C  | -3.27212700 | 1.38663900  | 2.27128000  |
| C  | -5.41631600 | 0.93183400  | 1.28014900  |
| C  | -3.89270400 | 1.75052700  | 3.45166600  |
| H  | -2.17766700 | 1.41635200  | 2.19482500  |
| C  | -6.03233700 | 1.28885800  | 2.46880000  |
| H  | -6.02470100 | 0.61054500  | 0.42838700  |
| C  | -5.27428700 | 1.69629600  | 3.55262500  |
| H  | -3.29018400 | 2.07004100  | 4.30623200  |
| H  | -7.12189700 | 1.24413100  | 2.54610600  |
| H  | -5.76474800 | 1.97200600  | 4.48977400  |
| C  | 1.89235500  | -3.65060200 | 1.31648900  |
| H  | 1.75166500  | -4.56260800 | 1.91208700  |
| N  | 0.60453300  | -3.27313300 | 0.75404900  |
| H  | 2.24663800  | -2.83879900 | 1.98477500  |
| S  | -0.75692100 | -3.88179900 | 1.49400300  |
| O  | -1.85696200 | -3.54771900 | 0.64186100  |

|    |             |             |             |
|----|-------------|-------------|-------------|
| O  | -0.45828500 | -5.24611000 | 1.79412200  |
| C  | -0.90357100 | -2.98028500 | 2.98432600  |
| H  | -0.01278000 | -3.14846600 | 3.60419800  |
| H  | -1.01718600 | -1.91198700 | 2.74763900  |
| H  | -1.79466000 | -3.33562400 | 3.51706000  |
| C  | 3.79815700  | -1.43968100 | -3.96740500 |
| H  | 3.66764700  | -0.35260300 | -4.07726000 |
| H  | 4.73683000  | -1.73326300 | -4.46044300 |
| H  | 2.96466600  | -1.94871300 | -4.46395600 |
| C  | 1.93582800  | -0.02084100 | -0.69396200 |
| C  | 1.76413700  | 0.40619200  | -1.95590500 |
| H  | 1.29212600  | -0.26232300 | -2.67732600 |
| H  | 5.99598800  | -0.00901800 | -2.83116700 |
| O  | 2.51756700  | 0.63512400  | 0.29758300  |
| H  | 2.04163300  | 1.40755000  | -2.29052100 |
| Si | 2.82015500  | 2.24023900  | 0.71910300  |
| C  | 1.36568300  | 3.25339800  | 0.13821900  |
| C  | 2.87587300  | 2.05628200  | 2.57516900  |
| C  | 4.46990100  | 2.72714800  | -0.00328800 |
| H  | 1.20112200  | 2.97152100  | -0.92352200 |
| C  | 0.11249900  | 2.86354400  | 0.89956100  |
| C  | 1.56342300  | 4.75533500  | 0.16062100  |
| H  | 1.94718600  | 1.48666600  | 2.80194600  |
| C  | 4.04099500  | 1.18950000  | 3.01153400  |
| C  | 2.82031900  | 3.33787500  | 3.38305200  |
| H  | 5.12670700  | 1.86446100  | 0.23784100  |
| C  | 5.10176800  | 3.94643600  | 0.64329000  |
| C  | 4.46358900  | 2.87393600  | -1.51184400 |
| H  | 0.17891900  | 3.13593400  | 1.96757300  |
| H  | -0.77812400 | 3.37810800  | 0.49736000  |
| H  | -0.08814200 | 1.77620400  | 0.85464600  |
| H  | 0.65365000  | 5.27071100  | -0.19952200 |
| H  | 1.76460500  | 5.14255800  | 1.17462900  |
| H  | 2.39412600  | 5.08445300  | -0.48381200 |
| H  | 5.01419000  | 1.67835400  | 2.82413400  |
| H  | 3.99966500  | 0.97622200  | 4.09421500  |
| H  | 4.05861800  | 0.21965700  | 2.48668500  |
| H  | 1.92617400  | 3.94486100  | 3.16834800  |
| H  | 2.80385600  | 3.11890000  | 4.46537800  |
| H  | 3.69479100  | 3.98620000  | 3.21115300  |
| H  | 6.07372200  | 4.17430300  | 0.17103400  |
| H  | 4.48587300  | 4.85672100  | 0.54269500  |
| H  | 5.29997200  | 3.80256900  | 1.71644600  |
| H  | 3.79088900  | 3.68203100  | -1.85214800 |



|   |            |            |             |
|---|------------|------------|-------------|
| H | 5.47140000 | 3.12725400 | -1.88718100 |
| H | 4.16018000 | 1.95091100 | -2.03056100 |

## 2-2a

$E_{\text{sol}} = -3169.871076$  Hartree

Thermal correction to Free Energy = 0.763636 Hartree

Sum of electronic and thermal Free Energies = -3169.107440 Hartree

Number of Imaginary Frequencies: 0

|    |             |             |             |
|----|-------------|-------------|-------------|
| C  | 5.85088000  | 0.77775600  | 1.70160500  |
| C  | 4.80432200  | 0.35081100  | 2.50921400  |
| C  | 3.93983100  | -0.65538600 | 2.09704600  |
| C  | 4.14503600  | -1.22433400 | 0.86020200  |
| C  | 5.19588600  | -0.77996900 | 0.07297500  |
| C  | 6.06813700  | 0.21658700  | 0.45229300  |
| H  | 6.50878900  | 1.57816600  | 2.04857000  |
| H  | 4.65277900  | 0.82417000  | 3.48312300  |
| H  | 3.10462600  | -0.96795900 | 2.73122200  |
| H  | 6.87932100  | 0.55845000  | -0.19475300 |
| C  | 3.40386000  | -2.28691600 | 0.10328700  |
| C  | 4.12725100  | -2.25874700 | -1.18005700 |
| N  | 5.15132100  | -1.46970000 | -1.14429700 |
| C  | 3.49122100  | -3.68856700 | 0.73411600  |
| H  | 3.48034800  | -4.45534500 | -0.05834400 |
| H  | 4.40004400  | -3.82090100 | 1.33669600  |
| C  | 1.87598500  | -2.05831300 | 0.00963400  |
| C  | 1.27096700  | -0.94725100 | -0.40978100 |
| H  | 3.91872800  | -2.87390500 | -2.05794500 |
| Au | -0.75195300 | -0.52404600 | -0.19054100 |
| P  | -3.02385600 | 0.08869400  | 0.06050900  |
| C  | -3.40881200 | 1.68144200  | -0.70503700 |
| C  | -3.45047900 | 2.84852000  | 0.05045700  |
| C  | -3.54867700 | 1.76006100  | -2.09023300 |
| C  | -3.64079100 | 4.07341200  | -0.56816700 |
| H  | -3.33414800 | 2.80633600  | 1.13891300  |
| C  | -3.74705100 | 2.98427100  | -2.70113200 |
| H  | -3.50674100 | 0.85016300  | -2.69973100 |
| C  | -3.79160600 | 4.14380300  | -1.94247100 |
| H  | -3.67494500 | 4.98373500  | 0.03760600  |
| H  | -3.86437600 | 3.03335100  | -3.78717800 |
| H  | -3.94538400 | 5.11082700  | -2.42924700 |
| C  | -4.19779000 | -1.07256000 | -0.67267600 |
| C  | -3.77450200 | -2.37683400 | -0.91600800 |
| C  | -5.50651500 | -0.71087900 | -0.98879400 |
| C  | -4.65203800 | -3.31062600 | -1.43841300 |

|    |             |             |             |
|----|-------------|-------------|-------------|
| H  | -2.73303600 | -2.65494100 | -0.70742500 |
| C  | -6.38009100 | -1.64735800 | -1.50958300 |
| H  | -5.84505200 | 0.31961500  | -0.83830600 |
| C  | -5.95648000 | -2.94844000 | -1.72968300 |
| H  | -4.30921600 | -4.33083700 | -1.63010500 |
| H  | -7.40515600 | -1.35507200 | -1.75319000 |
| H  | -6.64914200 | -3.68523300 | -2.14607100 |
| C  | -3.49342200 | 0.30526500  | 1.79438800  |
| C  | -2.48048900 | 0.51312200  | 2.72741800  |
| C  | -4.82096200 | 0.34081800  | 2.21168200  |
| C  | -2.78977900 | 0.76170600  | 4.05413300  |
| H  | -1.43245100 | 0.47991800  | 2.40242200  |
| C  | -5.12558900 | 0.57815800  | 3.53974400  |
| H  | -5.63157300 | 0.18033400  | 1.49442100  |
| C  | -4.11267200 | 0.79167400  | 4.46111500  |
| H  | -1.98632800 | 0.92525400  | 4.77809800  |
| H  | -6.17104700 | 0.59831100  | 3.85956500  |
| H  | -4.35912600 | 0.98093400  | 5.50952900  |
| C  | 2.20366800  | -3.77296300 | 1.51748800  |
| H  | 1.92168700  | -4.80465000 | 1.76758700  |
| N  | 1.22583100  | -3.13477500 | 0.66025800  |
| H  | 2.26423000  | -3.19719400 | 2.45705900  |
| S  | 0.32420200  | -4.21490800 | -0.26237200 |
| O  | -0.19265700 | -3.50873000 | -1.39321300 |
| O  | 1.06341100  | -5.43027800 | -0.46598700 |
| C  | -0.97520600 | -4.54210500 | 0.85937900  |
| H  | -0.57348500 | -5.00032500 | 1.77241800  |
| H  | -1.48476400 | -3.60073300 | 1.10378100  |
| H  | -1.67145500 | -5.24228200 | 0.37932100  |
| C  | 2.08131900  | 0.09173800  | -1.04776600 |
| C  | 2.57665300  | -0.00787200 | -2.29178700 |
| H  | 2.36664300  | -0.89171400 | -2.89477400 |
| C  | 6.00503200  | -1.16422100 | -2.24551600 |
| H  | 5.81371600  | -0.12926300 | -2.57183000 |
| H  | 7.05551200  | -1.25409000 | -1.94077900 |
| H  | 5.79939200  | -1.85338200 | -3.07020800 |
| H  | 3.14199900  | 0.81007900  | -2.74850100 |
| O  | 2.28663600  | 1.15942400  | -0.27942400 |
| Si | 1.83214800  | 2.75834700  | -0.21254600 |
| C  | 1.25344600  | 3.32646500  | -1.89519200 |
| C  | 0.49186500  | 2.79722700  | 1.08720300  |
| C  | 3.43472100  | 3.52686900  | 0.34997200  |
| H  | 1.98965200  | 2.90776700  | -2.61455800 |
| C  | -0.10730700 | 2.75935600  | -2.25026400 |

|   |             |            |             |
|---|-------------|------------|-------------|
| C | 1.26214100  | 4.83314900 | -2.07005900 |
| H | -0.26385700 | 2.07470500 | 0.70122700  |
| C | 1.00819500  | 2.23243300 | 2.39607700  |
| C | -0.22543300 | 4.11299900 | 1.30644700  |
| H | 3.75505800  | 2.84373500 | 1.16828900  |
| C | 3.36384100  | 4.92265300 | 0.93134900  |
| C | 4.48823200  | 3.43012300 | -0.73555600 |
| H | -0.39520100 | 3.02023200 | -3.28492100 |
| H | -0.15179000 | 1.65802700 | -2.17306700 |
| H | -0.89732100 | 3.16515700 | -1.59363500 |
| H | 0.88839100  | 5.11714000 | -3.06982100 |
| H | 0.61466400  | 5.34624000 | -1.33759000 |
| H | 2.26962000  | 5.26734500 | -1.97131500 |
| H | 1.78132200  | 2.87992300 | 2.84862100  |
| H | 0.19978600  | 2.14250500 | 3.14576200  |
| H | 1.45612100  | 1.23000600 | 2.27007200  |
| H | -0.71866100 | 4.48824100 | 0.39496800  |
| H | -1.01570800 | 4.00507600 | 2.07379100  |
| H | 0.44732400  | 4.91144600 | 1.66401400  |
| H | 4.36385500  | 5.27906000 | 1.23692200  |
| H | 2.97361100  | 5.66418300 | 0.21324700  |
| H | 2.72410700  | 4.97293300 | 1.82755300  |
| H | 4.28295600  | 4.11992600 | -1.57364100 |
| H | 5.49278800  | 3.68790700 | -0.35441400 |
| H | 4.55773800  | 2.41305300 | -1.16183300 |

## 2-2b

$E_{\text{sol}} = -3169.872749$  Hartree

Thermal correction to Free Energy = 0.763671 Hartree

Sum of electronic and thermal Free Energies = -3169.109078 Hartree

Number of Imaginary Frequencies: 0

|   |            |             |             |
|---|------------|-------------|-------------|
| C | 6.60228400 | -0.78635300 | -0.99292200 |
| C | 6.36150200 | -0.86339500 | 0.37309200  |
| C | 5.17938600 | -1.40059800 | 0.86493500  |
| C | 4.24823100 | -1.86399000 | -0.03675400 |
| C | 4.52879100 | -1.80989600 | -1.39362700 |
| C | 5.68337100 | -1.26738400 | -1.91341900 |
| H | 7.53919100 | -0.35316300 | -1.35172600 |
| H | 7.11347100 | -0.48718300 | 1.07172400  |
| H | 4.99536800 | -1.45676600 | 1.94149100  |
| C | 2.90174700 | -2.48547600 | 0.14547600  |
| C | 2.60948800 | -2.90942500 | -1.24622700 |
| N | 3.47749300 | -2.43207000 | -2.08175800 |
| C | 2.80691900 | -3.58123600 | 1.20028100  |

|    |             |             |             |
|----|-------------|-------------|-------------|
| H  | 3.06812300  | -4.54700100 | 0.73900400  |
| H  | 3.54802600  | -3.39212900 | 1.99264100  |
| C  | 0.46578300  | -1.96727400 | 0.37432800  |
| C  | 1.72552100  | -1.48593600 | 0.17544400  |
| H  | 1.72125600  | -3.44362800 | -1.58908400 |
| Au | -1.20822100 | -0.74883900 | 0.09517400  |
| P  | -3.07868400 | 0.65468900  | -0.25265700 |
| C  | -2.65020200 | 2.19113500  | -1.10162600 |
| C  | -3.27789500 | 3.40265100  | -0.82656100 |
| C  | -1.62293900 | 2.14929900  | -2.04153100 |
| C  | -2.87860300 | 4.55447600  | -1.48413100 |
| H  | -4.08190000 | 3.45131600  | -0.08452100 |
| C  | -1.23131600 | 3.30063000  | -2.70074800 |
| H  | -1.11129600 | 1.19948700  | -2.24217800 |
| C  | -1.85500600 | 4.50601100  | -2.41763700 |
| H  | -3.37327600 | 5.50361100  | -1.26146800 |
| H  | -0.42066300 | 3.25859200  | -3.43389300 |
| H  | -1.53871900 | 5.41902900  | -2.92959000 |
| C  | -4.36025700 | -0.13086600 | -1.24986700 |
| C  | -4.51632300 | -1.51057600 | -1.13836300 |
| C  | -5.19642600 | 0.59005000  | -2.09764800 |
| C  | -5.50576700 | -2.15889000 | -1.85536400 |
| H  | -3.84339100 | -2.08216700 | -0.48590500 |
| C  | -6.17893200 | -0.06531400 | -2.81934700 |
| H  | -5.07956400 | 1.67478600  | -2.19645400 |
| C  | -6.33531300 | -1.43660100 | -2.69765300 |
| H  | -5.62165800 | -3.24225600 | -1.76413400 |
| H  | -6.83092900 | 0.50380900  | -3.48752800 |
| H  | -7.11090500 | -1.95002300 | -3.27261800 |
| C  | -3.88745500 | 1.17258200  | 1.27709200  |
| C  | -3.07264700 | 1.61697800  | 2.31732300  |
| C  | -5.26692100 | 1.14707200  | 1.45075100  |
| C  | -3.63031700 | 2.03888600  | 3.50954200  |
| H  | -1.98334600 | 1.63287200  | 2.18407700  |
| C  | -5.82014300 | 1.56102900  | 2.65174600  |
| H  | -5.91954100 | 0.80063400  | 0.64329700  |
| C  | -5.00605900 | 2.00581900  | 3.67911800  |
| H  | -2.98377100 | 2.38877400  | 4.31857400  |
| H  | -6.90487700 | 1.53416000  | 2.78439000  |
| H  | -5.44794500 | 2.32942300  | 4.62544800  |
| C  | 1.43663200  | -3.62647100 | 1.81174200  |
| H  | 1.22909800  | -4.62340700 | 2.22228500  |
| N  | 0.43856400  | -3.29571300 | 0.80593600  |
| H  | 1.36230000  | -2.88607700 | 2.63305700  |

|    |             |             |             |
|----|-------------|-------------|-------------|
| S  | -1.02448800 | -4.06904100 | 0.95560200  |
| O  | -1.80584100 | -3.69171500 | -0.18332000 |
| O  | -0.71418000 | -5.44511200 | 1.19107100  |
| C  | -1.76732400 | -3.41644400 | 2.39946200  |
| H  | -1.13658100 | -3.63670000 | 3.27107100  |
| H  | -1.90724200 | -2.33088000 | 2.28815100  |
| H  | -2.74379300 | -3.90162500 | 2.52720000  |
| C  | 3.38007400  | -2.46183600 | -3.50806000 |
| H  | 3.32433400  | -1.43329800 | -3.89341200 |
| H  | 4.26536800  | -2.95486400 | -3.93108100 |
| H  | 2.48006000  | -3.01190300 | -3.79937500 |
| C  | 1.95789400  | -0.12894400 | -0.37275700 |
| C  | 1.57980700  | 0.16995700  | -1.62209900 |
| H  | 1.07843700  | -0.59397500 | -2.21848400 |
| H  | 5.87823000  | -1.22964500 | -2.98731400 |
| O  | 2.58347100  | 0.67719700  | 0.47948300  |
| H  | 1.73351900  | 1.14495100  | -2.08738200 |
| Si | 2.99235900  | 2.31358500  | 0.50706000  |
| C  | 1.54365500  | 3.31185800  | -0.12579000 |
| C  | 3.23841000  | 2.53623400  | 2.34517000  |
| C  | 4.58334900  | 2.49884100  | -0.45648500 |
| H  | 1.28726100  | 2.89855300  | -1.12098100 |
| C  | 0.32961600  | 3.09467800  | 0.75940000  |
| C  | 1.80747600  | 4.78839700  | -0.34562300 |
| H  | 2.33625400  | 2.05651400  | 2.78465700  |
| C  | 4.43748100  | 1.75715200  | 2.84657700  |
| C  | 3.27459200  | 3.96340400  | 2.85313000  |
| H  | 5.20734100  | 1.65977600  | -0.07864200 |
| C  | 5.35010200  | 3.77765100  | -0.17524800 |
| C  | 4.43191300  | 2.29329700  | -1.95109100 |
| H  | 0.48132800  | 3.48430400  | 1.78149700  |
| H  | -0.56150300 | 3.60758000  | 0.35458700  |
| H  | 0.07346000  | 2.02336500  | 0.85481800  |
| H  | 0.89445900  | 5.29145100  | -0.71500800 |
| H  | 2.10796600  | 5.31879300  | 0.57353600  |
| H  | 2.59353800  | 4.96953400  | -1.09651700 |
| H  | 5.38844500  | 2.16100700  | 2.45564100  |
| H  | 4.50818800  | 1.79182100  | 3.94810000  |
| H  | 4.39119300  | 0.69538400  | 2.55795900  |
| H  | 2.33707400  | 4.50945000  | 2.66541900  |
| H  | 3.44002500  | 3.98527200  | 3.94498800  |
| H  | 4.08862700  | 4.55682300  | 2.40441800  |
| H  | 6.29491100  | 3.79791100  | -0.74727200 |
| H  | 4.79067100  | 4.68245300  | -0.46813900 |

|   |            |            |             |
|---|------------|------------|-------------|
| H | 5.62040400 | 3.89164900 | 0.88621100  |
| H | 3.75958200 | 3.04155700 | -2.41051900 |
| H | 5.40694500 | 2.39266500 | -2.46197500 |
| H | 4.03987000 | 1.29624000 | -2.20774900 |

## 2-2a-ts

$E_{\text{sol}} = -3169.865581$  Hartree

Thermal correction to Free Energy = 0.762387 Hartree

Sum of electronic and thermal Free Energies = -3169.103194 Hartree

Number of Imaginary Frequencies: 1

|    |             |             |             |
|----|-------------|-------------|-------------|
| C  | 5.35513100  | 0.28821700  | 2.58908800  |
| C  | 4.15341100  | -0.22039800 | 3.06259500  |
| C  | 3.40076400  | -1.10593600 | 2.30056200  |
| C  | 3.87168000  | -1.46769200 | 1.05785300  |
| C  | 5.06137100  | -0.92374500 | 0.59359700  |
| C  | 5.83480500  | -0.05350000 | 1.33298900  |
| H  | 5.92679500  | 0.98563700  | 3.20643500  |
| H  | 3.79212100  | 0.08538300  | 4.04751600  |
| H  | 2.44173100  | -1.48432900 | 2.66948000  |
| H  | 6.76572000  | 0.36746000  | 0.94435200  |
| C  | 3.30510400  | -2.35410700 | -0.02093800 |
| C  | 4.19240000  | -1.98376600 | -1.15174900 |
| N  | 5.26046900  | -1.34581500 | -0.71674500 |
| C  | 3.41660400  | -3.85527200 | 0.28496300  |
| H  | 3.47767400  | -4.42004400 | -0.66103300 |
| H  | 4.29591900  | -4.10103100 | 0.89623000  |
| C  | 1.79050900  | -2.17024800 | -0.22219200 |
| C  | 1.22473500  | -1.00095700 | -0.53292000 |
| H  | 4.21821400  | -2.49003100 | -2.11752100 |
| Au | -0.76166900 | -0.45330000 | -0.25884600 |
| P  | -2.99400800 | 0.19747700  | 0.16240300  |
| C  | -3.29863000 | 1.97092200  | -0.01275200 |
| C  | -3.87838700 | 2.75012900  | 0.98235200  |
| C  | -2.93051300 | 2.56377800  | -1.22076500 |
| C  | -4.10234900 | 4.10075000  | 0.76132300  |
| H  | -4.16841900 | 2.30227900  | 1.93823800  |
| C  | -3.16099800 | 3.90886300  | -1.43745700 |
| H  | -2.46009400 | 1.95615500  | -2.00484800 |
| C  | -3.74947100 | 4.67965200  | -0.44540500 |
| H  | -4.56329100 | 4.70618200  | 1.54626900  |
| H  | -2.87474200 | 4.36271400  | -2.39040200 |
| H  | -3.92935600 | 5.74459900  | -0.61490700 |
| C  | -4.20189700 | -0.56077700 | -0.94659700 |
| C  | -3.86115900 | -1.73716100 | -1.60985300 |

|    |             |             |             |
|----|-------------|-------------|-------------|
| C  | -5.45431000 | 0.00923700  | -1.16490100 |
| C  | -4.76557100 | -2.34030900 | -2.46702000 |
| H  | -2.86449300 | -2.17524100 | -1.46449900 |
| C  | -6.35542000 | -0.59858700 | -2.02039300 |
| H  | -5.72747500 | 0.94389500  | -0.66311500 |
| C  | -6.01206700 | -1.77284700 | -2.67115800 |
| H  | -4.48808100 | -3.25899600 | -2.99041600 |
| H  | -7.33627300 | -0.14425700 | -2.18574800 |
| H  | -6.72259100 | -2.24645600 | -3.35406400 |
| C  | -3.50268400 | -0.21962000 | 1.84553100  |
| C  | -2.52288600 | -0.19994400 | 2.83800200  |
| C  | -4.81425000 | -0.53079100 | 2.18967000  |
| C  | -2.85266500 | -0.47263800 | 4.15336200  |
| H  | -1.48431600 | 0.03053500  | 2.56656700  |
| C  | -5.13720300 | -0.81553100 | 3.50502300  |
| H  | -5.59657700 | -0.55732400 | 1.42526400  |
| C  | -4.16040100 | -0.78298200 | 4.48724100  |
| H  | -2.07755200 | -0.45065200 | 4.92376200  |
| H  | -6.16929400 | -1.06527500 | 3.76643400  |
| H  | -4.42164400 | -1.00926700 | 5.52485900  |
| C  | 2.09857300  | -4.14873000 | 0.95712600  |
| H  | 1.82431500  | -5.21012600 | 0.93347300  |
| N  | 1.15418700  | -3.33794500 | 0.21623500  |
| H  | 2.10517000  | -3.81624500 | 2.01076100  |
| S  | 0.02797800  | -4.12457000 | -0.73135800 |
| O  | -0.26408100 | -3.29999000 | -1.86209400 |
| O  | 0.46391900  | -5.47672800 | -0.92423500 |
| C  | -1.35855500 | -4.15140800 | 0.33188000  |
| H  | -1.10383400 | -4.70002000 | 1.24811700  |
| H  | -1.64305200 | -3.11795500 | 0.57769700  |
| H  | -2.18130700 | -4.66299300 | -0.18554300 |
| C  | 2.15462400  | -0.00061300 | -1.00633900 |
| C  | 2.91136300  | -0.21699000 | -2.12173200 |
| H  | 2.60031100  | -0.98279600 | -2.82964500 |
| C  | 6.29499800  | -0.83384200 | -1.55102800 |
| H  | 7.27441100  | -1.00217100 | -1.08360500 |
| H  | 6.26956000  | -1.34299400 | -2.51981900 |
| H  | 6.15834600  | 0.25059000  | -1.70715600 |
| H  | 3.63310000  | 0.53149500  | -2.46747000 |
| O  | 2.29259500  | 1.06890000  | -0.25064600 |
| Si | 2.05852800  | 2.72233100  | -0.33913700 |
| C  | 3.58078900  | 3.31283400  | 0.55563700  |
| C  | 1.94665300  | 3.23337400  | -2.13002000 |
| C  | 0.46205400  | 2.98952600  | 0.58381300  |

|   |             |            |             |
|---|-------------|------------|-------------|
| H | 3.63162800  | 2.62778900 | 1.43288200  |
| C | 4.82291800  | 3.05927200 | -0.27611500 |
| C | 3.55293700  | 4.73087300 | 1.08504100  |
| H | 2.77810500  | 2.70453300 | -2.64288600 |
| C | 0.65012500  | 2.76959700 | -2.76797000 |
| C | 2.15493100  | 4.71752100 | -2.36037800 |
| H | -0.25858600 | 2.34079700 | 0.03545800  |
| C | -0.10087300 | 4.39632000 | 0.56183400  |
| C | 0.53709400  | 2.45771800 | 2.00089000  |
| H | 5.74507700  | 3.19642200 | 0.31625400  |
| H | 4.85340900  | 2.03315500 | -0.68534400 |
| H | 4.89098500  | 3.75268800 | -1.13319800 |
| H | 4.49173900  | 4.97810100 | 1.61158200  |
| H | 3.43911600  | 5.47923600 | 0.28129200  |
| H | 2.73364800  | 4.89764800 | 1.80302900  |
| H | -0.22037500 | 3.29774400 | -2.33908600 |
| H | 0.64182700  | 2.97184400 | -3.85333100 |
| H | 0.46611700  | 1.68679500 | -2.64409100 |
| H | 3.14619400  | 5.06473500 | -2.02778900 |
| H | 2.07325800  | 4.96619300 | -3.43331500 |
| H | 1.40314400  | 5.33391000 | -1.83859900 |
| H | -1.04234000 | 4.45203300 | 1.13905000  |
| H | 0.58671900  | 5.13367100 | 1.01135100  |
| H | -0.33222400 | 4.74957000 | -0.45615500 |
| H | 1.18454900  | 3.08415100 | 2.64106900  |
| H | -0.46292100 | 2.44977300 | 2.47500200  |
| H | 0.93313200  | 1.42722000 | 2.04681000  |

## 2-2b-ts

$E_{\text{sol}} = -3169.858508$  Hartree

Thermal correction to Free Energy = 0.766403 Hartree

Sum of electronic and thermal Free Energies = -3169.092105 Hartree

Number of Imaginary Frequencies: 1

|   |            |             |             |
|---|------------|-------------|-------------|
| C | 6.22297800 | -0.36919700 | 1.65652200  |
| C | 5.08387400 | -0.91187800 | 2.23207000  |
| C | 4.05317200 | -1.41042600 | 1.44103300  |
| C | 4.19439500 | -1.37499100 | 0.07064100  |
| C | 5.32561100 | -0.78800500 | -0.48171600 |
| C | 6.36087800 | -0.28278300 | 0.27727700  |
| H | 7.01899700 | 0.01823000  | 2.29703100  |
| H | 4.99106600 | -0.94034700 | 3.32037700  |
| H | 3.13817600 | -1.80064300 | 1.90199600  |
| C | 3.27914800 | -1.82187000 | -1.05249500 |
| C | 3.97139200 | -1.16095900 | -2.21565000 |



|    |             |             |             |
|----|-------------|-------------|-------------|
| N  | 5.19048900  | -0.77810800 | -1.86546000 |
| C  | 3.18129900  | -3.32997500 | -1.21931400 |
| H  | 2.72791700  | -3.54907600 | -2.20142300 |
| H  | 4.17017800  | -3.81275600 | -1.18729900 |
| C  | 0.83959100  | -1.92721000 | -0.36928100 |
| C  | 1.90363500  | -1.25736500 | -0.86625900 |
| H  | 3.80459500  | -1.44035300 | -3.25741000 |
| Au | -1.00235400 | -0.93755500 | -0.24952100 |
| P  | -3.04387300 | 0.24070900  | -0.20120600 |
| C  | -3.47044700 | 1.03029400  | -1.76802600 |
| C  | -4.73310600 | 1.57413600  | -1.99312600 |
| C  | -2.50418900 | 1.10951800  | -2.76715700 |
| C  | -5.01540600 | 2.19888200  | -3.19371000 |
| H  | -5.50530100 | 1.51320600  | -1.21837300 |
| C  | -2.78998500 | 1.73843600  | -3.96754800 |
| H  | -1.51378500 | 0.66746000  | -2.59650900 |
| C  | -4.04367000 | 2.28478200  | -4.17921600 |
| H  | -6.00810500 | 2.62498800  | -3.36315500 |
| H  | -2.02503100 | 1.79625700  | -4.74645200 |
| H  | -4.27154700 | 2.77926500  | -5.12738500 |
| C  | -4.45210000 | -0.81301300 | 0.22264300  |
| C  | -4.41033700 | -2.15116600 | -0.15907000 |
| C  | -5.57137500 | -0.32579400 | 0.89396400  |
| C  | -5.47972100 | -2.98625400 | 0.11390100  |
| H  | -3.52147400 | -2.54331900 | -0.66667600 |
| C  | -6.63634200 | -1.16621200 | 1.16712200  |
| H  | -5.61094000 | 0.72184900  | 1.21125000  |
| C  | -6.59221400 | -2.49478700 | 0.77740100  |
| H  | -5.43715200 | -4.03682400 | -0.18595400 |
| H  | -7.51095200 | -0.77676200 | 1.69471600  |
| H  | -7.43315200 | -3.15739700 | 0.99955300  |
| C  | -3.06926300 | 1.55059600  | 1.04036100  |
| C  | -3.19251700 | 2.89719600  | 0.71958200  |
| C  | -2.88080600 | 1.17862800  | 2.37229000  |
| C  | -3.14645000 | 3.85720400  | 1.71983900  |
| H  | -3.32226500 | 3.20927500  | -0.32121000 |
| C  | -2.84857200 | 2.13781800  | 3.36702000  |
| H  | -2.76315500 | 0.11886900  | 2.62978100  |
| C  | -2.98418300 | 3.48021700  | 3.04118500  |
| H  | -3.24477600 | 4.91424200  | 1.45792100  |
| H  | -2.71198300 | 1.83557100  | 4.40884100  |
| H  | -2.95186900 | 4.23930200  | 3.82746000  |
| C  | 2.32159900  | -3.90409300 | -0.12772300 |
| H  | 2.19748700  | -4.98224700 | -0.28432400 |

|    |             |             |             |
|----|-------------|-------------|-------------|
| N  | 1.00532400  | -3.28539200 | -0.12959900 |
| H  | 2.81946800  | -3.77319800 | 0.85472900  |
| S  | -0.11571800 | -4.04248600 | 0.83344200  |
| O  | -1.42223100 | -3.72548700 | 0.34498100  |
| O  | 0.29877800  | -5.40787400 | 0.92465400  |
| C  | 0.08972500  | -3.28910100 | 2.40332800  |
| H  | 1.11736100  | -3.45577400 | 2.75495500  |
| H  | -0.12225900 | -2.21264900 | 2.32734800  |
| H  | -0.61564700 | -3.75603800 | 3.10282800  |
| C  | 6.12600600  | -0.15324800 | -2.73802300 |
| H  | 6.18433400  | 0.92922500  | -2.53139900 |
| H  | 7.12471400  | -0.59160400 | -2.60317800 |
| H  | 5.80992200  | -0.30011500 | -3.77629800 |
| C  | 1.96393900  | 0.17539400  | -1.15396200 |
| C  | 2.54179600  | 0.52850300  | -2.35564800 |
| H  | 2.23043700  | -0.03623100 | -3.23346200 |
| H  | 7.24419600  | 0.17055400  | -0.17914000 |
| O  | 1.66392300  | 0.97258200  | -0.17979300 |
| H  | 2.86552100  | 1.55477900  | -2.55273500 |
| Si | 1.93992900  | 2.54284200  | 0.39340600  |
| C  | 0.79118800  | 2.44412100  | 1.85515600  |
| C  | 3.75654500  | 2.60407700  | 0.82674600  |
| C  | 1.41110800  | 3.75916500  | -0.91498900 |
| H  | -0.18096100 | 2.16073800  | 1.39128200  |
| C  | 1.17990700  | 1.30553600  | 2.77927700  |
| C  | 0.56258000  | 3.72693800  | 2.62919900  |
| H  | 3.97635800  | 1.58471400  | 1.21421900  |
| C  | 4.65737200  | 2.83719100  | -0.37118400 |
| C  | 4.08902000  | 3.58699900  | 1.93336300  |
| H  | 1.99712200  | 3.49572200  | -1.82118500 |
| C  | 1.72229100  | 5.20576700  | -0.58751100 |
| C  | -0.05641800 | 3.57547800  | -1.25040900 |
| H  | 2.12878900  | 1.50517400  | 3.30958000  |
| H  | 0.40923300  | 1.14775500  | 3.55607200  |
| H  | 1.30112300  | 0.34994700  | 2.23813800  |
| H  | -0.09143000 | 3.54576500  | 3.50002800  |
| H  | 1.49480600  | 4.16219700  | 3.02642000  |
| H  | 0.07290500  | 4.50618500  | 2.02249800  |
| H  | 4.49332700  | 3.82924600  | -0.82855600 |
| H  | 5.72148300  | 2.79895400  | -0.07404000 |
| H  | 4.52269800  | 2.08372900  | -1.16388800 |
| H  | 3.57963700  | 3.34922000  | 2.87989900  |
| H  | 5.17299700  | 3.58377800  | 2.14379800  |
| H  | 3.82338900  | 4.62627100  | 1.66961000  |

|   |             |            |             |
|---|-------------|------------|-------------|
| H | 1.42027600  | 5.87266400 | -1.41359100 |
| H | 1.18462500  | 5.55507100 | 0.31008500  |
| H | 2.79581600  | 5.38120900 | -0.41251000 |
| H | -0.70308600 | 3.89049500 | -0.41164600 |
| H | -0.35474800 | 4.17519600 | -2.12791200 |
| H | -0.30895700 | 2.52382200 | -1.47798400 |

### 2-3a

$E_{\text{sol}} = -3169.903250$  Hartree

Thermal correction to Free Energy = 0.768585 Hartree

Sum of electronic and thermal Free Energies = -3169.134665 Hartree

Number of Imaginary Frequencies: 0

|    |             |             |             |
|----|-------------|-------------|-------------|
| C  | 0.75902200  | -3.90633200 | 3.62276800  |
| C  | 0.13036300  | -4.47388300 | 2.52409800  |
| C  | 0.61659300  | -4.23095200 | 1.24493000  |
| C  | 1.73030600  | -3.42990100 | 1.09107200  |
| C  | 2.33588100  | -2.83514600 | 2.19832600  |
| C  | 1.86929400  | -3.08863900 | 3.48235500  |
| H  | 0.37841400  | -4.11411000 | 4.62714800  |
| H  | -0.73637100 | -5.12395200 | 2.66274000  |
| H  | 0.12499100  | -4.69800500 | 0.38547900  |
| H  | 2.35401600  | -2.65221300 | 4.35861300  |
| C  | 2.48249800  | -3.00785400 | -0.14790200 |
| C  | 3.66909500  | -2.22020600 | 0.42491600  |
| N  | 3.35824100  | -2.01182500 | 1.82461300  |
| C  | 2.80699500  | -4.11273200 | -1.13279900 |
| H  | 3.66593800  | -3.80602700 | -1.75350700 |
| H  | 3.06197800  | -5.06015700 | -0.64088600 |
| C  | 1.55188100  | -2.11719400 | -0.93723600 |
| C  | 1.34586500  | -0.77885400 | -0.61333300 |
| H  | 4.59699300  | -2.82298400 | 0.31052400  |
| Au | -0.51304800 | 0.14090200  | -0.32470700 |
| P  | -2.71647500 | 0.73933600  | 0.30040800  |
| C  | -2.93414000 | 2.17976900  | 1.36775100  |
| C  | -3.10986400 | 2.05188700  | 2.74171000  |
| C  | -2.82709300 | 3.45232500  | 0.80981400  |
| C  | -3.17850000 | 3.18037000  | 3.54177500  |
| H  | -3.19805400 | 1.06104200  | 3.19889400  |
| C  | -2.89846000 | 4.57507800  | 1.61291500  |
| H  | -2.68791400 | 3.56831000  | -0.27120100 |
| C  | -3.07289800 | 4.44128000  | 2.98154000  |
| H  | -3.32092000 | 3.06834400  | 4.62010600  |
| H  | -2.81754500 | 5.56816900  | 1.16220000  |
| H  | -3.12710400 | 5.32990800  | 3.61631000  |

|    |             |             |             |
|----|-------------|-------------|-------------|
| C  | -3.81486600 | 1.02288100  | -1.10530400 |
| C  | -3.41366900 | 0.54607600  | -2.35085700 |
| C  | -5.03912300 | 1.68016600  | -0.98818100 |
| C  | -4.23191100 | 0.70010500  | -3.45682200 |
| H  | -2.43603000 | 0.05893500  | -2.45472800 |
| C  | -5.85367400 | 1.83104800  | -2.09653600 |
| H  | -5.35925600 | 2.08134800  | -0.02062600 |
| C  | -5.45357900 | 1.33905800  | -3.32897100 |
| H  | -3.90434900 | 0.32653500  | -4.43062600 |
| H  | -6.81287000 | 2.34607800  | -1.99665300 |
| H  | -6.09882300 | 1.46586300  | -4.20221200 |
| C  | -3.42054100 | -0.64418000 | 1.23427000  |
| C  | -2.55412000 | -1.48788300 | 1.92933800  |
| C  | -4.79224300 | -0.87440900 | 1.30480400  |
| C  | -3.05299900 | -2.53494000 | 2.68554600  |
| H  | -1.47009500 | -1.31518100 | 1.88216500  |
| C  | -5.28493000 | -1.93006000 | 2.05166200  |
| H  | -5.49132000 | -0.22807600 | 0.76589400  |
| C  | -4.41793100 | -2.75995000 | 2.74404600  |
| H  | -2.36116400 | -3.18157400 | 3.23326400  |
| H  | -6.36310400 | -2.10541800 | 2.09315300  |
| H  | -4.81110000 | -3.59216500 | 3.33384300  |
| C  | 1.56750800  | -4.22114300 | -1.98671100 |
| H  | 1.78256100  | -4.42806300 | -3.04270200 |
| N  | 0.97589200  | -2.88950600 | -1.86651000 |
| H  | 0.85654000  | -4.98746200 | -1.63454500 |
| S  | -0.35444600 | -2.51813400 | -2.84857100 |
| O  | -0.32476000 | -1.12105600 | -3.12299700 |
| O  | -0.29826200 | -3.47678000 | -3.90124700 |
| C  | -1.68064800 | -2.91533200 | -1.78434500 |
| H  | -1.66379500 | -3.99515600 | -1.58687800 |
| H  | -1.59717400 | -2.34375000 | -0.84744200 |
| H  | -2.61614200 | -2.65428200 | -2.29853000 |
| C  | 2.50751200  | -0.17106400 | -0.20061300 |
| C  | 3.83005800  | -0.87692000 | -0.25063400 |
| H  | 4.18240000  | -1.00166300 | -1.28943600 |
| C  | 4.44237600  | -1.77246200 | 2.71551400  |
| H  | 4.08548500  | -1.29912900 | 3.64159400  |
| H  | 4.99195400  | -2.69802100 | 2.98579300  |
| H  | 5.15801800  | -1.07581100 | 2.25647300  |
| H  | 4.59566900  | -0.29048300 | 0.27866100  |
| O  | 2.47911800  | 1.05117200  | 0.24466500  |
| Si | 3.17003100  | 2.54096800  | -0.17930500 |
| C  | 4.49755200  | 2.21346100  | -1.44985900 |

|   |             |            |             |
|---|-------------|------------|-------------|
| C | 1.71831100  | 3.49493100 | -0.85380600 |
| C | 3.77737100  | 3.15561600 | 1.46739400  |
| H | 5.10117600  | 1.37818000 | -1.04011000 |
| C | 3.91502200  | 1.74913100 | -2.77273100 |
| C | 5.45959200  | 3.36820100 | -1.65853400 |
| H | 1.24885700  | 2.79278700 | -1.58033600 |
| C | 0.68891400  | 3.78732600 | 0.22087500  |
| C | 2.06936000  | 4.76189600 | -1.60815400 |
| H | 2.90897800  | 2.99717800 | 2.14379700  |
| C | 4.12527200  | 4.62927800 | 1.52376900  |
| C | 4.91330100  | 2.29984600 | 1.99135300  |
| H | 4.70728600  | 1.40104000 | -3.45767600 |
| H | 3.19247100  | 0.92008100 | -2.67071800 |
| H | 3.38513100  | 2.56482500 | -3.29343200 |
| H | 6.20234100  | 3.12200700 | -2.43732000 |
| H | 4.95495000  | 4.29214200 | -1.98830900 |
| H | 6.02487600  | 3.61195400 | -0.74477200 |
| H | 1.06585700  | 4.51629800 | 0.96025800  |
| H | -0.22383300 | 4.22876400 | -0.21647100 |
| H | 0.37724700  | 2.88774000 | 0.78105200  |
| H | 2.71147800  | 4.57829100 | -2.48360600 |
| H | 1.15836200  | 5.26206500 | -1.98116300 |
| H | 2.59008100  | 5.49711200 | -0.97076900 |
| H | 4.41569900  | 4.92631900 | 2.54648200  |
| H | 4.97470400  | 4.89027000 | 0.87016200  |
| H | 3.28150200  | 5.27473800 | 1.23187900  |
| H | 5.80653000  | 2.35424400 | 1.34288300  |
| H | 5.23256700  | 2.62648000 | 2.99635000  |
| H | 4.63032900  | 1.23641500 | 2.07666000  |

### 2-3b

$E_{\text{sol}} = -3169.913200$  Hartree

Thermal correction to Free Energy = 0.769456 Hartree

Sum of electronic and thermal Free Energies = -3169.143744 Hartree

Number of Imaginary Frequencies: 0

|   |            |             |            |
|---|------------|-------------|------------|
| C | 5.86984500 | -2.53469100 | 2.79224900 |
| C | 4.60082000 | -3.05996100 | 2.61577100 |
| C | 3.84070500 | -2.67791900 | 1.51395600 |
| C | 4.36980100 | -1.79173200 | 0.60273200 |
| C | 5.64954700 | -1.26308600 | 0.79545900 |
| C | 6.41089100 | -1.62192600 | 1.89710900 |
| H | 6.45657100 | -2.82729300 | 3.66859900 |
| H | 4.19117100 | -3.76030100 | 3.34803100 |
| H | 2.81770400 | -3.05845500 | 1.39318500 |

|    |             |             |             |
|----|-------------|-------------|-------------|
| C  | 3.80545700  | -1.20273600 | -0.66994500 |
| C  | 4.74519000  | -0.00954100 | -0.85877800 |
| N  | 5.97422800  | -0.40303800 | -0.22599200 |
| C  | 3.76262900  | -2.18680200 | -1.81688900 |
| H  | 3.55723000  | -1.63777900 | -2.75286700 |
| H  | 4.71860400  | -2.71820700 | -1.94348500 |
| C  | 1.25141900  | -1.30757200 | -0.75027500 |
| C  | 2.44289300  | -0.59644000 | -0.51843200 |
| H  | 4.91810100  | 0.21723300  | -1.92591400 |
| Au | -0.65731100 | -0.56338000 | -0.26823000 |
| P  | -2.90534300 | -0.10654800 | 0.33848700  |
| C  | -3.18969900 | -0.15423900 | 2.12135100  |
| C  | -4.46828900 | -0.31192200 | 2.65546900  |
| C  | -2.09302300 | -0.11241400 | 2.97704700  |
| C  | -4.64103400 | -0.39868800 | 4.02476000  |
| H  | -5.33691100 | -0.37824200 | 1.99107200  |
| C  | -2.26978100 | -0.20362900 | 4.34690500  |
| H  | -1.08537000 | -0.01886500 | 2.55479800  |
| C  | -3.54355600 | -0.34368200 | 4.87004500  |
| H  | -5.64626200 | -0.51965400 | 4.43716900  |
| H  | -1.40187700 | -0.17325800 | 5.01088800  |
| H  | -3.68491200 | -0.42152100 | 5.95148000  |
| C  | -3.61798500 | 1.40696100  | -0.33919700 |
| C  | -3.26923200 | 1.74044400  | -1.64765500 |
| C  | -4.52942100 | 2.20072300  | 0.34900700  |
| C  | -3.84839400 | 2.83269900  | -2.26788800 |
| H  | -2.54204500 | 1.12233900  | -2.19036400 |
| C  | -5.10045600 | 3.29876400  | -0.27421900 |
| H  | -4.80016900 | 1.96581100  | 1.38288100  |
| C  | -4.76844700 | 3.61052900  | -1.58137200 |
| H  | -3.57466100 | 3.08139300  | -3.29706500 |
| H  | -5.81685400 | 3.91706700  | 0.27276100  |
| H  | -5.22524700 | 4.47542800  | -2.06982200 |
| C  | -3.97839800 | -1.43362900 | -0.27307100 |
| C  | -3.74217700 | -2.71606000 | 0.21975800  |
| C  | -4.99078600 | -1.23666600 | -1.20321000 |
| C  | -4.51241800 | -3.78147500 | -0.20233000 |
| H  | -2.94855600 | -2.87575800 | 0.96055200  |
| C  | -5.75569000 | -2.31109000 | -1.63066400 |
| H  | -5.19597500 | -0.23741200 | -1.59900700 |
| C  | -5.52010300 | -3.58022900 | -1.13368100 |
| H  | -4.32539800 | -4.78151000 | 0.19881000  |
| H  | -6.55201100 | -2.14733100 | -2.36198900 |
| H  | -6.12850000 | -4.42288100 | -1.47302300 |

|    |             |             |             |
|----|-------------|-------------|-------------|
| C  | 2.68219500  | -3.19376800 | -1.57788500 |
| H  | 2.52238200  | -3.80285900 | -2.47518300 |
| N  | 1.41256700  | -2.54318700 | -1.24415200 |
| H  | 2.95210200  | -3.88876300 | -0.76123600 |
| S  | 0.04930300  | -3.57389500 | -1.42321300 |
| O  | -1.02641800 | -2.80830800 | -1.96378000 |
| O  | 0.53331200  | -4.72199800 | -2.11721300 |
| C  | -0.28829900 | -4.01913400 | 0.23241600  |
| H  | 0.57941200  | -4.55665100 | 0.63728900  |
| H  | -0.50575400 | -3.12244800 | 0.82903200  |
| H  | -1.16019900 | -4.68764800 | 0.21979800  |
| C  | 6.97858100  | 0.58495300  | -0.04483200 |
| H  | 6.74101200  | 1.32413200  | 0.75131200  |
| H  | 7.93903000  | 0.11444800  | 0.21131300  |
| H  | 7.12469100  | 1.13258200  | -0.98701700 |
| C  | 2.57361100  | 0.74338200  | -0.20960800 |
| C  | 4.00301300  | 1.14818100  | -0.19189100 |
| H  | 4.16638300  | 2.11816500  | -0.68428400 |
| H  | 7.40274000  | -1.19522700 | 2.06943100  |
| H  | 4.31468300  | 1.27824200  | 0.86444000  |
| O  | 1.61450400  | 1.55140500  | 0.06519300  |
| Si | 1.34207700  | 3.24560200  | -0.13168100 |
| C  | 2.35039900  | 4.26402200  | 1.07521800  |
| C  | 1.68958700  | 3.53473800  | -1.93887700 |
| C  | -0.46900300 | 3.22070400  | 0.28312800  |
| H  | 2.30903100  | 3.70617100  | 2.03570100  |
| C  | 3.81177000  | 4.49568900  | 0.73707300  |
| C  | 1.68071800  | 5.61077000  | 1.31401000  |
| H  | 2.73277500  | 3.19122900  | -2.11015600 |
| C  | 0.78347100  | 2.67297500  | -2.80093400 |
| C  | 1.62844800  | 4.98849300  | -2.36502200 |
| H  | -0.81978500 | 2.32968800  | -0.28576500 |
| C  | -1.30139100 | 4.39895500  | -0.17759800 |
| C  | -0.71267500 | 2.91847200  | 1.74870700  |
| H  | 4.24569100  | 5.24325300  | 1.42334900  |
| H  | 4.43385800  | 3.59589900  | 0.83178400  |
| H  | 3.95250300  | 4.89144200  | -0.28372800 |
| H  | 2.26788000  | 6.20293500  | 2.03647700  |
| H  | 1.61471600  | 6.21979300  | 0.39526100  |
| H  | 0.66484900  | 5.52988400  | 1.72614900  |
| H  | -0.27448700 | 2.98347900  | -2.72175500 |
| H  | 1.05585400  | 2.75018900  | -3.86736100 |
| H  | 0.82670800  | 1.60172200  | -2.53438300 |
| H  | 2.35127300  | 5.62052200  | -1.82526300 |

|   |             |            |             |
|---|-------------|------------|-------------|
| H | 1.85166300  | 5.09214200 | -3.44072900 |
| H | 0.62966100  | 5.42981800 | -2.20859400 |
| H | -2.36115500 | 4.25176300 | 0.09487900  |
| H | -0.98995300 | 5.34990200 | 0.28419300  |
| H | -1.26954400 | 4.54519600 | -1.26899400 |
| H | -0.46547900 | 3.77574100 | 2.39787900  |
| H | -1.77705300 | 2.68489000 | 1.93586600  |
| H | -0.12351300 | 2.05890100 | 2.11135500  |

## 2-4a

$E_{\text{sol}} = -1353.733847$  Hartree

Thermal correction to Free Energy = 0.271142 Hartree

Sum of electronic and thermal Free Energies = -1353.462705 Hartree

Number of Imaginary Frequencies: 0

|   |             |             |             |
|---|-------------|-------------|-------------|
| C | 3.12978200  | -2.52552100 | 1.20323600  |
| C | 1.78179300  | -2.74304200 | 1.44321600  |
| C | 0.82853300  | -1.89918600 | 0.87324700  |
| C | 1.25185700  | -0.85758100 | 0.08055200  |
| C | 2.61580700  | -0.64027900 | -0.15656000 |
| C | 3.57213400  | -1.47147800 | 0.40998000  |
| H | 3.87124700  | -3.18774700 | 1.66311500  |
| H | 1.46582300  | -3.56979600 | 2.08557500  |
| H | -0.23963900 | -2.05347300 | 1.07345500  |
| H | 4.64173300  | -1.30189700 | 0.25382600  |
| C | 0.50822700  | 0.17034200  | -0.74358000 |
| C | 1.57932700  | 1.24630400  | -0.85400700 |
| N | 2.78645000  | 0.44773300  | -0.98144400 |
| C | 0.02418700  | -0.45170900 | -2.05358600 |
| H | -0.16836900 | 0.34469200  | -2.79464400 |
| H | 0.73860000  | -1.16855000 | -2.48289000 |
| C | -0.78145600 | 0.66003000  | -0.15622900 |
| C | -0.89667700 | 1.73591400  | 0.65134800  |
| H | 1.43974300  | 1.86844300  | -1.75841400 |
| C | -1.27505400 | -1.10013500 | -1.64504500 |
| H | -2.00188800 | -1.19182200 | -2.46329500 |
| N | -1.76370700 | -0.15682300 | -0.64454500 |
| H | -1.12564400 | -2.10435700 | -1.20159300 |
| S | -3.29769600 | -0.29609200 | -0.02492000 |
| O | -3.81262800 | 1.01643800  | 0.19868200  |
| O | -3.96025300 | -1.20543400 | -0.90269200 |
| C | -3.03286600 | -1.06750000 | 1.52408000  |
| H | -2.60081200 | -2.06545600 | 1.36665900  |
| H | -2.36720100 | -0.44457100 | 2.13889300  |
| H | -4.00768300 | -1.16250500 | 2.02258000  |



|   |             |            |             |
|---|-------------|------------|-------------|
| C | 0.25593300  | 2.56305200 | 0.93334400  |
| C | 1.59584600  | 2.10827800 | 0.40394900  |
| H | 2.22830900  | 3.00081200 | 0.27543200  |
| C | 4.04149800  | 1.12039900 | -1.01120500 |
| H | 4.36927500  | 1.51032000 | -0.02337500 |
| H | 4.82528400  | 0.44000900 | -1.37998100 |
| H | 3.98554100  | 1.96434200 | -1.71517500 |
| H | 2.05923800  | 1.51888600 | 1.22117600  |
| O | 0.16777900  | 3.58079600 | 1.58599100  |
| H | -1.86204200 | 2.08202100 | 1.02700600  |

## 2-4b

$E_{\text{sol}} = -1353.732579$  Hartree

Thermal correction to Free Energy = 0.270286 Hartree

Sum of electronic and thermal Free Energies = -1353.462293 Hartree

Number of Imaginary Frequencies: 0

|   |             |             |             |
|---|-------------|-------------|-------------|
| C | 3.18328700  | 2.75418900  | -0.88198400 |
| C | 1.83880500  | 2.83893600  | -1.21093400 |
| C | 0.96110200  | 1.83504300  | -0.80122500 |
| C | 1.44337800  | 0.77822600  | -0.06256900 |
| C | 2.80463600  | 0.69532000  | 0.25535700  |
| C | 3.69253900  | 1.68073200  | -0.15776300 |
| H | 3.87022800  | 3.53784000  | -1.21958100 |
| H | 1.47162900  | 3.68054500  | -1.80502200 |
| H | -0.09716400 | 1.86973300  | -1.09363200 |
| C | 0.74534400  | -0.42239900 | 0.53474600  |
| C | 1.95602100  | -1.34924900 | 0.75635800  |
| N | 3.05966100  | -0.44441500 | 0.98059200  |
| C | -0.07151100 | -0.07397700 | 1.77144300  |
| H | -0.31069200 | -1.00506400 | 2.31772100  |
| H | 0.48383600  | 0.58346200  | 2.46056200  |
| C | -1.46046700 | -1.03720300 | -0.42446400 |
| C | -0.12322300 | -1.17869000 | -0.40676800 |
| H | 1.81755500  | -2.00248500 | 1.63907600  |
| C | -1.35408200 | 0.61825000  | 1.37826700  |
| H | -1.99360200 | 0.77799400  | 2.25865500  |
| N | -2.10239100 | -0.19489000 | 0.43108500  |
| H | -1.14340700 | 1.61597300  | 0.94148000  |
| S | -3.68196900 | 0.22685700  | 0.12035000  |
| O | -4.27254000 | -0.88234300 | -0.55725700 |
| O | -4.20811200 | 0.71018800  | 1.35700200  |
| C | -3.53939400 | 1.56883500  | -0.99610400 |
| H | -2.97080800 | 2.38370000  | -0.52565900 |
| H | -3.04502000 | 1.22999900  | -1.91671700 |

|   |             |             |             |
|---|-------------|-------------|-------------|
| H | -4.55300100 | 1.92287800  | -1.23054000 |
| C | 4.37404900  | -0.98667300 | 1.01599400  |
| H | 4.76713700  | -1.27410800 | 0.01580100  |
| H | 5.07800100  | -0.26348300 | 1.45784100  |
| H | 4.38262300  | -1.88258900 | 1.65582600  |
| C | 0.62744200  | -2.22530700 | -1.08745200 |
| C | 2.03619400  | -2.18221200 | -0.52422400 |
| H | 2.44071600  | -3.19719700 | -0.39266900 |
| H | 4.76203600  | 1.61587600  | 0.06421600  |
| H | 2.68044300  | -1.68287700 | -1.27471500 |
| O | 0.22943300  | -2.99120500 | -1.92955400 |
| H | -2.10485000 | -1.64081500 | -1.07358100 |

### 3-1

$E_{\text{sol}} = -2681.167443$  Hartree

Thermal correction to Free Energy = 0.574150 Hartree

Sum of electronic and thermal Free Energies = -2680.593293 Hartree

Number of Imaginary Frequencies: 0

|    |             |             |             |
|----|-------------|-------------|-------------|
| C  | 5.79767300  | 1.79065900  | 1.06809900  |
| C  | 5.95965900  | 0.57280700  | 1.73887000  |
| C  | 5.52460100  | -0.61382200 | 1.18466800  |
| C  | 4.91223100  | -0.58878200 | -0.07007100 |
| C  | 4.76310700  | 0.65452100  | -0.72674800 |
| C  | 5.20092100  | 1.85039600  | -0.17563300 |
| H  | 6.15497900  | 2.71207200  | 1.53642600  |
| H  | 6.44377300  | 0.56613800  | 2.71930900  |
| H  | 5.66200100  | -1.55947400 | 1.72017000  |
| C  | 4.32144800  | -1.57427700 | -0.91440100 |
| C  | 3.84960800  | -0.89867200 | -2.00469300 |
| N  | 4.11015000  | 0.43135000  | -1.89466900 |
| C  | 4.19570600  | -3.02553800 | -0.64321700 |
| H  | 3.87599900  | -3.55905000 | -1.55411400 |
| H  | 5.17667400  | -3.45301500 | -0.36364400 |
| C  | 1.38526500  | -1.82983200 | 0.44565900  |
| C  | 1.68647300  | -0.63794000 | 0.65606700  |
| H  | 3.33696800  | -1.27777000 | -2.88792600 |
| Au | -0.72706500 | -1.04185100 | 0.15312400  |
| P  | -2.66356400 | 0.24961400  | -0.02407200 |
| C  | -3.08030600 | 0.98733500  | 1.56704200  |
| C  | -4.35216000 | 0.91314600  | 2.12287600  |
| C  | -2.05999200 | 1.63185200  | 2.26495300  |
| C  | -4.59654000 | 1.48199200  | 3.36256400  |
| H  | -5.16120700 | 0.40349700  | 1.59006600  |
| C  | -2.31348000 | 2.20923200  | 3.49388500  |

|   |             |             |             |
|---|-------------|-------------|-------------|
| H | -1.05141400 | 1.68653500  | 1.83279800  |
| C | -3.58345000 | 2.13020300  | 4.04581500  |
| H | -5.59727700 | 1.41666300  | 3.79769500  |
| H | -1.50962500 | 2.71962000  | 4.03107300  |
| H | -3.78242800 | 2.57778100  | 5.02337600  |
| C | -2.40031300 | 1.63325000  | -1.15640700 |
| C | -1.83371000 | 1.34818700  | -2.39821800 |
| C | -2.75619300 | 2.94192800  | -0.84883000 |
| C | -1.64431000 | 2.35565800  | -3.32586700 |
| H | -1.54739600 | 0.31742600  | -2.64202400 |
| C | -2.55448600 | 3.94913700  | -1.77921500 |
| H | -3.20181500 | 3.18150300  | 0.12155900  |
| C | -2.00449800 | 3.65884400  | -3.01634200 |
| H | -1.20684300 | 2.12152100  | -4.29982800 |
| H | -2.83671500 | 4.97591700  | -1.53073400 |
| H | -1.85156600 | 4.45676000  | -3.74817100 |
| C | -4.13455200 | -0.60012600 | -0.61572700 |
| C | -4.23314300 | -1.97599900 | -0.43132700 |
| C | -5.17788400 | 0.09160000  | -1.22602100 |
| C | -5.36733300 | -2.65295500 | -0.84307400 |
| H | -3.40652900 | -2.52195200 | 0.03943800  |
| C | -6.30761700 | -0.59127500 | -1.63874700 |
| H | -5.10844700 | 1.17360400  | -1.38073800 |
| C | -6.40295600 | -1.96089500 | -1.44784400 |
| H | -5.43746500 | -3.73393500 | -0.69809300 |
| H | -7.12381000 | -0.04617400 | -2.12042000 |
| H | -7.29570400 | -2.49662200 | -1.78162600 |
| C | 3.24557600  | -3.37791200 | 0.47984700  |
| H | 3.29848400  | -4.45929800 | 0.67972300  |
| N | 1.85508300  | -3.05434200 | 0.15945000  |
| H | 3.50984100  | -2.85223100 | 1.41472700  |
| S | 0.75470600  | -4.30781500 | 0.09680100  |
| O | -0.45147200 | -3.73755900 | -0.42484000 |
| O | 1.42240300  | -5.37136900 | -0.58055000 |
| C | 0.48887100  | -4.75101800 | 1.76515000  |
| H | 1.43517100  | -5.06893300 | 2.22135700  |
| H | 0.06892400  | -3.89257900 | 2.30568300  |
| H | -0.22487800 | -5.58464700 | 1.78580300  |
| C | 3.77168200  | 1.42887500  | -2.84741500 |
| H | 3.17159700  | 2.23106400  | -2.38484400 |
| H | 4.66982000  | 1.88779800  | -3.29139900 |
| H | 3.18107400  | 0.97583300  | -3.65220100 |
| C | 1.93068100  | 0.70895600  | 0.89798200  |
| H | 2.51504800  | 0.94376400  | 1.79783800  |

|   |            |            |             |
|---|------------|------------|-------------|
| C | 1.47152500 | 1.68668900 | 0.08090700  |
| H | 0.87829000 | 1.37313500 | -0.79291800 |
| C | 1.62468900 | 3.10647400 | 0.24236100  |
| C | 2.37759100 | 3.69682900 | 1.26696300  |
| C | 0.99320300 | 3.93968900 | -0.68892100 |
| C | 2.48480000 | 5.06835200 | 1.34755800  |
| H | 2.89043100 | 3.07482800 | 2.00653800  |
| C | 1.10106400 | 5.31293000 | -0.60186800 |
| H | 0.40878500 | 3.48021900 | -1.49527500 |
| C | 1.84654500 | 5.88160200 | 0.41864100  |
| H | 3.07544700 | 5.51844500 | 2.14961900  |
| H | 0.59680000 | 5.94633700 | -1.33627400 |
| H | 1.93421500 | 6.96884400 | 0.49417700  |
| H | 5.07105900 | 2.80316800 | -0.69794200 |

### 3-1a-ts

$E_{\text{sol}} = -2681.150390$  Hartree

Thermal correction to Free Energy = 0.579776 Hartree

Sum of electronic and thermal Free Energies = -2680.570614 Hartree

Number of Imaginary Frequencies: 1

|    |             |             |             |
|----|-------------|-------------|-------------|
| C  | -6.94825000 | -0.73699100 | -1.11666900 |
| C  | -6.37501800 | -2.00448900 | -1.20417800 |
| C  | -5.30877200 | -2.37316000 | -0.40429000 |
| C  | -4.80585400 | -1.45284900 | 0.50600100  |
| C  | -5.44157100 | -0.20505700 | 0.61070000  |
| C  | -6.49347300 | 0.18811200  | -0.19563200 |
| H  | -7.78162100 | -0.47600300 | -1.77317500 |
| H  | -6.78191800 | -2.72454500 | -1.91939600 |
| H  | -4.89083000 | -3.38085100 | -0.47644700 |
| H  | -6.95538700 | 1.17448800  | -0.10044900 |
| C  | -3.71831600 | -1.46170500 | 1.47148000  |
| C  | -3.87126800 | -0.23959200 | 2.16031000  |
| N  | -4.84479900 | 0.48665400  | 1.64138800  |
| C  | -3.19030800 | -2.67349200 | 2.17495500  |
| H  | -2.55296400 | -2.33621100 | 3.00819600  |
| H  | -4.00070100 | -3.27752500 | 2.61116800  |
| C  | -1.93390000 | -1.29477500 | 0.49681400  |
| C  | -1.37786300 | -0.14925400 | 0.16530300  |
| H  | -3.27761900 | 0.14612300  | 2.98875400  |
| Au | 0.75433400  | -0.11459200 | 0.15582900  |
| P  | 3.09612200  | 0.11783300  | 0.08169700  |
| C  | 3.59553400  | 1.50278400  | -0.96702100 |
| C  | 4.72957000  | 1.46358400  | -1.77161200 |
| C  | 2.81011400  | 2.65275600  | -0.94903400 |

|   |             |             |             |
|---|-------------|-------------|-------------|
| C | 5.07219900  | 2.56296300  | -2.54002000 |
| H | 5.35475600  | 0.56496700  | -1.80112400 |
| C | 3.15971100  | 3.75034500  | -1.71298700 |
| H | 1.90784500  | 2.68553500  | -0.32448000 |
| C | 4.29024600  | 3.70496200  | -2.51217900 |
| H | 5.96379300  | 2.52339400  | -3.17192600 |
| H | 2.53574200  | 4.64789100  | -1.69282500 |
| H | 4.56183600  | 4.56922300  | -3.12480900 |
| C | 3.85306400  | 0.42743500  | 1.69009800  |
| C | 3.29199800  | -0.18777600 | 2.80686200  |
| C | 4.97865400  | 1.23235700  | 1.84450100  |
| C | 3.85358800  | -0.00886700 | 4.05767200  |
| H | 2.40114600  | -0.81639400 | 2.68784600  |
| C | 5.53352300  | 1.41301000  | 3.09946100  |
| H | 5.42960200  | 1.72371200  | 0.97602400  |
| C | 4.97327500  | 0.79443500  | 4.20489100  |
| H | 3.40708900  | -0.49510800 | 4.92897400  |
| H | 6.41565900  | 2.04815200  | 3.21433800  |
| H | 5.41311600  | 0.94297500  | 5.19519900  |
| C | 3.94092100  | -1.32587000 | -0.59835800 |
| C | 3.34647700  | -1.95789100 | -1.68835500 |
| C | 5.14415000  | -1.81054700 | -0.09694800 |
| C | 3.95598800  | -3.04883700 | -2.27874800 |
| H | 2.38647400  | -1.59289100 | -2.07138900 |
| C | 5.74383800  | -2.91221800 | -0.68472100 |
| H | 5.62195000  | -1.32582900 | 0.76059500  |
| C | 5.15364200  | -3.52923100 | -1.77466500 |
| H | 3.48290300  | -3.53748200 | -3.13463800 |
| H | 6.68755100  | -3.29220500 | -0.28341400 |
| H | 5.62998300  | -4.39958300 | -2.23416700 |
| C | -2.38106000 | -3.52248700 | 1.22995000  |
| H | -1.66081800 | -4.15613600 | 1.76726200  |
| N | -1.68626400 | -2.59650900 | 0.35713900  |
| H | -3.01546900 | -4.19277600 | 0.62417300  |
| S | -1.12174900 | -3.21627300 | -1.12805500 |
| O | -0.04184800 | -2.38390800 | -1.54679100 |
| O | -0.92645400 | -4.60574900 | -0.86594500 |
| C | -5.17573100 | 1.82122900  | 2.01971600  |
| H | -4.57948100 | 2.10880600  | 2.89210000  |
| H | -4.96277600 | 2.51796400  | 1.19432600  |
| H | -6.24287400 | 1.88883100  | 2.27270500  |
| C | -2.12129700 | 1.04650100  | -0.08680600 |
| H | -3.18105900 | 0.92788300  | -0.35942900 |
| C | -1.59470900 | 2.28843500  | -0.08933600 |

|   |             |             |             |
|---|-------------|-------------|-------------|
| H | -0.53474600 | 2.38717300  | 0.19715700  |
| C | -2.26715000 | 3.52693400  | -0.40822500 |
| C | -1.61520400 | 4.73352400  | -0.13137500 |
| C | -3.53512400 | 3.59094500  | -1.00278300 |
| C | -2.20830900 | 5.95058700  | -0.40749800 |
| H | -0.61764100 | 4.70121800  | 0.32086700  |
| C | -4.12510800 | 4.80744600  | -1.27782600 |
| H | -4.06602800 | 2.67103900  | -1.26954000 |
| C | -3.46833300 | 5.99416800  | -0.98118900 |
| H | -1.67748400 | 6.87832200  | -0.17681900 |
| H | -5.11289400 | 4.83382700  | -1.74632000 |
| H | -3.94010800 | 6.95402800  | -1.20701400 |
| C | -2.44876300 | -2.99244500 | -2.24145800 |
| H | -2.07213900 | -3.23442600 | -3.24395200 |
| H | -3.26904400 | -3.67195500 | -1.98577800 |
| H | -2.77487400 | -1.94365500 | -2.21822000 |

### 3-1b-ts

$E_{\text{sol}} = -2681.157768$  Hartree

Thermal correction to Free Energy = 0.577736 Hartree

Sum of electronic and thermal Free Energies = -2680.580032 Hartree

Number of Imaginary Frequencies: 1

|    |             |             |             |
|----|-------------|-------------|-------------|
| C  | 5.79576200  | 0.67232200  | 2.37979100  |
| C  | 5.26092700  | -0.50405500 | 2.90633900  |
| C  | 4.65002000  | -1.44343800 | 2.09624000  |
| C  | 4.59322600  | -1.20141700 | 0.73019000  |
| C  | 5.16565300  | -0.02521400 | 0.22142200  |
| C  | 5.75714000  | 0.93542500  | 1.02280200  |
| H  | 6.25872900  | 1.39879100  | 3.05239700  |
| H  | 5.32314800  | -0.68104500 | 3.98318300  |
| H  | 4.21809200  | -2.35394000 | 2.52337100  |
| C  | 3.98185100  | -1.88455300 | -0.38685300 |
| C  | 4.33991300  | -1.12685300 | -1.50497800 |
| N  | 4.98946600  | -0.02559700 | -1.14361300 |
| C  | 3.65179600  | -3.33811300 | -0.46973500 |
| H  | 3.60653100  | -3.64183400 | -1.52855900 |
| H  | 4.47965600  | -3.91001400 | -0.01489900 |
| C  | 1.04451900  | -1.84755300 | -0.32031600 |
| C  | 1.97200600  | -0.94100600 | -0.24346100 |
| H  | 4.12149300  | -1.32258500 | -2.55459700 |
| Au | -0.79797600 | -0.76286900 | -0.15173000 |
| P  | -2.70638100 | 0.57179600  | 0.11046700  |
| C  | -2.28432800 | 2.30333500  | 0.40956700  |
| C  | -3.07822800 | 3.13050300  | 1.19910000  |

|   |             |             |             |
|---|-------------|-------------|-------------|
| C | -1.12875600 | 2.81763600  | -0.17488800 |
| C | -2.72148100 | 4.45379100  | 1.39365000  |
| H | -3.98535100 | 2.73796200  | 1.67041700  |
| C | -0.77830700 | 4.14218800  | 0.02006800  |
| H | -0.49419700 | 2.16684800  | -0.79098300 |
| C | -1.57326500 | 4.95964800  | 0.80646600  |
| H | -3.34910500 | 5.09708600  | 2.01665300  |
| H | 0.13193300  | 4.53890000  | -0.44215400 |
| H | -1.29164200 | 6.00362800  | 0.96776500  |
| C | -3.79701400 | 0.55053200  | -1.32616900 |
| C | -3.81386700 | -0.59102200 | -2.12208900 |
| C | -4.61979300 | 1.62647700  | -1.64630200 |
| C | -4.65123900 | -0.65866200 | -3.22144500 |
| H | -3.15685700 | -1.43438100 | -1.87468100 |
| C | -5.44954400 | 1.55652000  | -2.75098800 |
| H | -4.61048300 | 2.53016200  | -1.02774100 |
| C | -5.46491600 | 0.41665400  | -3.53807500 |
| H | -4.65960000 | -1.55771000 | -3.84364000 |
| H | -6.09042500 | 2.40609400  | -3.00163600 |
| H | -6.11850700 | 0.36691300  | -4.41334000 |
| C | -3.72525100 | 0.08653700  | 1.52218900  |
| C | -3.09203600 | -0.05718000 | 2.75582700  |
| C | -5.09205600 | -0.14634400 | 1.42288700  |
| C | -3.81924700 | -0.41267700 | 3.87509600  |
| H | -2.01306800 | 0.12191000  | 2.83858100  |
| C | -5.81400400 | -0.51382600 | 2.54674600  |
| H | -5.60376900 | -0.04158100 | 0.46109400  |
| C | -5.18269400 | -0.64410900 | 3.77109100  |
| H | -3.31527800 | -0.51620200 | 4.83979100  |
| H | -6.88801200 | -0.69886400 | 2.46078200  |
| H | -5.75754100 | -0.93263100 | 4.65551800  |
| C | 2.37823900  | -3.77156400 | 0.20078800  |
| H | 2.30429300  | -4.86621400 | 0.14779100  |
| N | 1.22486100  | -3.20604700 | -0.47333400 |
| H | 2.36834400  | -3.47048700 | 1.26913600  |
| S | -0.14752700 | -4.14408600 | -0.51612500 |
| O | -1.08682300 | -3.44883900 | -1.34086300 |
| O | 0.29092200  | -5.45869700 | -0.86209000 |
| C | -0.75048500 | -4.16575100 | 1.12588600  |
| H | -0.00165400 | -4.61721400 | 1.79005600  |
| H | -0.97967100 | -3.13771200 | 1.44318800  |
| H | -1.66871900 | -4.76705200 | 1.14755900  |
| C | 5.49492700  | 0.97540500  | -2.02553800 |
| H | 5.18223800  | 1.97742200  | -1.69574800 |

|   |            |            |             |
|---|------------|------------|-------------|
| H | 6.59427000 | 0.94487600 | -2.05118600 |
| H | 5.10818900 | 0.79890600 | -3.03526800 |
| C | 2.20845100 | 0.41314000 | 0.07933800  |
| H | 2.31818300 | 0.66614200 | 1.14413900  |
| C | 2.37655600 | 1.36326100 | -0.86335100 |
| H | 2.28947400 | 1.05178700 | -1.91536100 |
| C | 2.62498000 | 2.76790400 | -0.65137200 |
| C | 2.63144400 | 3.61348100 | -1.76646800 |
| C | 2.86175600 | 3.32574700 | 0.61124500  |
| C | 2.84898200 | 4.97067300 | -1.62811600 |
| H | 2.45416600 | 3.18105000 | -2.75765700 |
| C | 3.07655600 | 4.68174300 | 0.74513800  |
| H | 2.88386600 | 2.68775200 | 1.50023900  |
| C | 3.06823300 | 5.50886600 | -0.37017600 |
| H | 2.84855300 | 5.61643200 | -2.51038500 |
| H | 3.25854000 | 5.10569100 | 1.73644400  |
| H | 3.24148200 | 6.58226400 | -0.25576400 |
| H | 6.17729200 | 1.85499200 | 0.60615700  |

### 3-2a

$E_{\text{sol}} = -2681.183402$  Hartree

Thermal correction to Free Energy = 0.579822 Hartree

Sum of electronic and thermal Free Energies = -2680.603580 Hartree

Number of Imaginary Frequencies: 0

|    |             |             |             |
|----|-------------|-------------|-------------|
| C  | 5.30926200  | -0.21254400 | 3.25121900  |
| C  | 4.18468700  | -1.00552100 | 3.44593900  |
| C  | 3.48964800  | -1.54778200 | 2.37303700  |
| C  | 3.94315700  | -1.27752100 | 1.09972300  |
| C  | 5.06683400  | -0.47976800 | 0.93209600  |
| C  | 5.77605600  | 0.07175600  | 1.97728200  |
| H  | 5.82945400  | 0.20474200  | 4.11625400  |
| H  | 3.83854500  | -1.19933000 | 4.46404900  |
| H  | 2.59479300  | -2.15579000 | 2.53553600  |
| H  | 6.64972400  | 0.70705000  | 1.81391000  |
| C  | 3.47115700  | -1.71931900 | -0.25519300 |
| C  | 4.36037100  | -0.91440600 | -1.11977400 |
| N  | 5.29228300  | -0.32370900 | -0.43793000 |
| C  | 3.77049600  | -3.20965600 | -0.54070300 |
| H  | 3.99872700  | -3.34348100 | -1.61012900 |
| H  | 4.61784000  | -3.58249100 | 0.04921800  |
| C  | 1.94833900  | -1.61523800 | -0.47712900 |
| C  | 1.25103100  | -0.49285000 | -0.27499600 |
| H  | 4.38377600  | -0.92177300 | -2.21110300 |
| Au | -0.78570800 | -0.03842200 | -0.11005400 |



|   |             |             |             |
|---|-------------|-------------|-------------|
| P | -3.04020500 | 0.61164500  | 0.14354800  |
| C | -3.23054300 | 2.13846400  | 1.08809200  |
| C | -4.26148700 | 2.34457400  | 1.99905100  |
| C | -2.28654300 | 3.14204300  | 0.88355300  |
| C | -4.34220800 | 3.54020900  | 2.69370600  |
| H | -5.01128000 | 1.56506000  | 2.17107500  |
| C | -2.37707400 | 4.33770400  | 1.57191800  |
| H | -1.46771100 | 2.97754200  | 0.17236300  |
| C | -3.40157900 | 4.53433800  | 2.48402300  |
| H | -5.15183900 | 3.69403600  | 3.41228400  |
| H | -1.63122800 | 5.11942200  | 1.40389200  |
| H | -3.46636600 | 5.47395900  | 3.03926100  |
| C | -3.88908800 | 0.89558900  | -1.42423600 |
| C | -3.53275400 | 0.09508200  | -2.50708400 |
| C | -4.87166900 | 1.86717000  | -1.58289300 |
| C | -4.15911900 | 0.25810300  | -3.72921300 |
| H | -2.74887200 | -0.66397300 | -2.38567800 |
| C | -5.48973200 | 2.03145300  | -2.81066300 |
| H | -5.15908200 | 2.50469500  | -0.74015900 |
| C | -5.13503700 | 1.22940500  | -3.88256800 |
| H | -3.87333300 | -0.37371800 | -4.57453300 |
| H | -6.25881100 | 2.79972200  | -2.93045700 |
| H | -5.62260500 | 1.36655000  | -4.85187300 |
| C | -4.01958900 | -0.63267700 | 1.01299200  |
| C | -3.40593000 | -1.31975900 | 2.05818400  |
| C | -5.33334700 | -0.93852000 | 0.67386000  |
| C | -4.09665400 | -2.29207500 | 2.75763100  |
| H | -2.36655500 | -1.08632100 | 2.32237200  |
| C | -6.01929700 | -1.91890600 | 1.37176600  |
| H | -5.82751900 | -0.41015800 | -0.14824500 |
| C | -5.40379400 | -2.59483900 | 2.41119500  |
| H | -3.60645300 | -2.82500600 | 3.57711600  |
| H | -7.04999600 | -2.15810200 | 1.09563500  |
| H | -5.94750300 | -3.37204700 | 2.95546600  |
| C | 2.46523100  | -3.88518800 | -0.23106200 |
| H | 2.35779000  | -4.85581300 | -0.72946100 |
| N | 1.52702900  | -2.92578700 | -0.76213300 |
| H | 2.33248300  | -4.02421200 | 0.86272100  |
| S | -0.01466900 | -3.41797500 | -1.04350000 |
| O | -0.65129100 | -2.41633700 | -1.83931500 |
| O | 0.09730400  | -4.75694500 | -1.53073600 |
| C | -0.76445300 | -3.49081800 | 0.53814900  |
| H | -0.29181400 | -4.29604000 | 1.11667600  |
| H | -0.64794700 | -2.52762000 | 1.05638800  |

|   |             |             |             |
|---|-------------|-------------|-------------|
| H | -1.83178800 | -3.71496300 | 0.40576400  |
| C | 2.02734900  | 0.71021200  | -0.10253300 |
| H | 1.99178900  | 1.18403400  | 0.89286500  |
| C | 2.73603600  | 1.30729400  | -1.08441500 |
| H | 2.63723600  | 0.90184400  | -2.10195000 |
| C | 3.64217500  | 2.42833800  | -0.94462600 |
| C | 4.06678900  | 2.91412600  | 0.29833700  |
| C | 4.19797400  | 3.00087300  | -2.09353900 |
| C | 5.00161400  | 3.92745700  | 0.38157600  |
| H | 3.67303200  | 2.47422500  | 1.22097900  |
| C | 5.13716700  | 4.01046000  | -2.00860300 |
| H | 3.88095700  | 2.63012600  | -3.07495500 |
| C | 5.54760700  | 4.47759900  | -0.76986700 |
| H | 5.32049300  | 4.28842300  | 1.36385200  |
| H | 5.55856100  | 4.43979500  | -2.92222200 |
| H | 6.29479900  | 5.27275000  | -0.69955800 |
| C | 6.39054100  | 0.41537800  | -0.98208300 |
| H | 6.41065600  | 1.42964700  | -0.55867200 |
| H | 7.33152900  | -0.09530300 | -0.73373100 |
| H | 6.28217100  | 0.47211300  | -2.06996500 |

### 3-2b

$E_{\text{sol}} = -2681.190110$  Hartree

Thermal correction to Free Energy = 0.578192 Hartree

Sum of electronic and thermal Free Energies = -2680.611918 Hartree

Number of Imaginary Frequencies: 0

|   |             |             |             |
|---|-------------|-------------|-------------|
| C | -6.79212100 | 1.28228500  | -0.97096300 |
| C | -6.39883600 | 0.55322300  | -2.08496200 |
| C | -5.42910300 | -0.43675400 | -1.99035400 |
| C | -4.87548400 | -0.68783300 | -0.75502100 |
| C | -5.30358700 | 0.03660300  | 0.34884600  |
| C | -6.24663700 | 1.03830300  | 0.28107800  |
| H | -7.55204700 | 2.06041100  | -1.07736100 |
| H | -6.85535400 | 0.76949900  | -3.05385200 |
| H | -5.10404500 | -0.99034300 | -2.87604800 |
| C | -3.75394000 | -1.57434100 | -0.32452800 |
| C | -3.80494600 | -1.39240600 | 1.14379800  |
| N | -4.60459400 | -0.42312800 | 1.47113000  |
| C | -3.75361300 | -3.01012100 | -0.82510400 |
| H | -4.34311100 | -3.63202200 | -0.13302500 |
| H | -4.25276300 | -3.05800800 | -1.80563700 |
| C | -1.25984700 | -1.56710000 | -0.09882100 |
| C | -2.38376100 | -0.86045300 | -0.42007600 |
| H | -3.17589300 | -1.88912900 | 1.88403000  |

|    |             |             |             |
|----|-------------|-------------|-------------|
| Au | 0.62343100  | -0.66722000 | -0.05451000 |
| P  | 2.73177000  | 0.39909900  | -0.13126700 |
| C  | 2.65544800  | 2.03118300  | -0.89817400 |
| C  | 3.73347300  | 2.62304600  | -1.55096900 |
| C  | 1.44681100  | 2.71607000  | -0.81650000 |
| C  | 3.59731700  | 3.88676800  | -2.09982800 |
| H  | 4.68842800  | 2.09268400  | -1.63327300 |
| C  | 1.31563500  | 3.98062600  | -1.36026900 |
| H  | 0.59230800  | 2.23629900  | -0.32617800 |
| C  | 2.39323900  | 4.56664300  | -2.00336200 |
| H  | 4.44623400  | 4.34742800  | -2.61235400 |
| H  | 0.35753800  | 4.50687400  | -1.28874000 |
| H  | 2.29333100  | 5.56284200  | -2.44346800 |
| C  | 3.46277500  | 0.63928600  | 1.50335300  |
| C  | 3.25250900  | -0.35560900 | 2.45560100  |
| C  | 4.23125900  | 1.75035300  | 1.83359300  |
| C  | 3.81743400  | -0.24756800 | 3.71329500  |
| H  | 2.63434200  | -1.22689100 | 2.20340600  |
| C  | 4.78736000  | 1.85793200  | 3.09697500  |
| H  | 4.40073800  | 2.54374500  | 1.09853500  |
| C  | 4.58385200  | 0.86063700  | 4.03538500  |
| H  | 3.64875500  | -1.03427400 | 4.45366800  |
| H  | 5.38825700  | 2.73596300  | 3.34972400  |
| H  | 5.02354600  | 0.94976300  | 5.03265900  |
| C  | 3.96292500  | -0.52516400 | -1.07799000 |
| C  | 3.53076200  | -1.21242000 | -2.21098300 |
| C  | 5.30722900  | -0.57252300 | -0.72221700 |
| C  | 4.43001700  | -1.92929100 | -2.97935800 |
| H  | 2.47018900  | -1.18395600 | -2.49216300 |
| C  | 6.20297500  | -1.29577200 | -1.49226000 |
| H  | 5.66158900  | -0.04365400 | 0.16861100  |
| C  | 5.76695000  | -1.97415800 | -2.61796000 |
| H  | 4.08109400  | -2.46591700 | -3.86558500 |
| H  | 7.25742100  | -1.33096700 | -1.20484000 |
| H  | 6.47705800  | -2.54869300 | -3.21863500 |
| C  | -2.34956800 | -3.52781300 | -0.95838400 |
| H  | -2.32782900 | -4.62157800 | -0.86318600 |
| N  | -1.50554000 | -2.93499300 | 0.06961100  |
| H  | -1.93433200 | -3.25556300 | -1.94929300 |
| S  | -0.29300900 | -3.90308900 | 0.66067800  |
| O  | 0.35769100  | -3.15093900 | 1.68923400  |
| O  | -0.91191800 | -5.15688300 | 0.96124900  |
| C  | 0.82704300  | -4.15534000 | -0.66099300 |
| H  | 0.31546700  | -4.66464500 | -1.48839200 |

|   |             |             |             |
|---|-------------|-------------|-------------|
| H | 1.23808400  | -3.19075500 | -0.99431800 |
| H | 1.64267800  | -4.79147800 | -0.29331700 |
| C | -4.73270500 | 0.16166900  | 2.77045200  |
| H | -4.43022100 | 1.21817300  | 2.73271500  |
| H | -5.77779000 | 0.10129400  | 3.10267000  |
| H | -4.09350600 | -0.37775500 | 3.47595500  |
| C | -2.43837800 | 0.58945200  | -0.54579500 |
| H | -2.97875300 | 0.98702900  | -1.41673200 |
| C | -1.97772900 | 1.44000100  | 0.38198700  |
| H | -1.47737200 | 1.01023300  | 1.26465700  |
| C | -2.06540900 | 2.88917200  | 0.36295300  |
| C | -1.30369100 | 3.61990600  | 1.27982200  |
| C | -2.89341400 | 3.59581100  | -0.51559800 |
| C | -1.34344000 | 5.00125400  | 1.30435800  |
| H | -0.65669200 | 3.07822900  | 1.97949000  |
| C | -2.93612700 | 4.97578600  | -0.48575400 |
| H | -3.53221500 | 3.05487900  | -1.22202100 |
| C | -2.15855400 | 5.68676900  | 0.41816400  |
| H | -0.73194500 | 5.54988600  | 2.02575700  |
| H | -3.59475400 | 5.50980100  | -1.17639700 |
| H | -2.19847800 | 6.77905700  | 0.43717900  |
| H | -6.55942900 | 1.60561600  | 1.16049700  |

### 3-2a-ts

$E_{\text{sol}} = -2681.172116$  Hartree

Thermal correction to Free Energy = 0.579111 Hartree

Sum of electronic and thermal Free Energies = -2680.593005 Hartree

Number of Imaginary Frequencies: 1

|   |            |             |             |
|---|------------|-------------|-------------|
| C | 4.73661800 | -0.27403400 | 3.74491200  |
| C | 3.55367300 | -1.00013400 | 3.74327600  |
| C | 3.01282900 | -1.47493300 | 2.55449000  |
| C | 3.67063200 | -1.19910600 | 1.37629700  |
| C | 4.84592900 | -0.45262600 | 1.39534400  |
| C | 5.40748500 | 0.01865000  | 2.56706300  |
| H | 5.14319500 | 0.08892000  | 4.69272700  |
| H | 3.04069800 | -1.19782700 | 4.68749800  |
| H | 2.07795000 | -2.04559400 | 2.55577700  |
| H | 6.33272600 | 0.60004900  | 2.56764800  |
| C | 3.40581600 | -1.60592900 | -0.05076500 |
| C | 4.35184500 | -0.70201000 | -0.76641600 |
| N | 5.28539400 | -0.27525500 | 0.10031900  |
| C | 3.74865900 | -3.07604300 | -0.32330700 |
| H | 4.03370600 | -3.19647000 | -1.38146800 |
| H | 4.56904100 | -3.44401800 | 0.30666100  |

|    |             |             |             |
|----|-------------|-------------|-------------|
| C  | 1.93102900  | -1.52323600 | -0.46496800 |
| C  | 1.26726400  | -0.34815500 | -0.44087800 |
| H  | 4.67377900  | -0.91285700 | -1.78961500 |
| Au | -0.77276000 | 0.08063300  | -0.22875500 |
| P  | -3.04679100 | 0.59498200  | 0.12729100  |
| C  | -3.34433300 | 2.36015900  | 0.37213500  |
| C  | -4.28652500 | 2.83989700  | 1.27680500  |
| C  | -2.59875900 | 3.26076100  | -0.38516000 |
| C  | -4.48081400 | 4.20372000  | 1.41586000  |
| H  | -4.87701300 | 2.14288700  | 1.88059200  |
| C  | -2.80163300 | 4.62195700  | -0.24703000 |
| H  | -1.84643500 | 2.88542900  | -1.08969900 |
| C  | -3.74111800 | 5.09369100  | 0.65567400  |
| H  | -5.22120100 | 4.57438200  | 2.13004500  |
| H  | -2.21299200 | 5.32298300  | -0.84460400 |
| H  | -3.89469600 | 6.17009800  | 0.77151500  |
| C  | -4.14221800 | 0.09122900  | -1.21625700 |
| C  | -3.80869000 | -1.04452800 | -1.94965200 |
| C  | -5.30134900 | 0.79458300  | -1.53000900 |
| C  | -4.62950700 | -1.47519000 | -2.97685600 |
| H  | -2.88442600 | -1.59109400 | -1.71944100 |
| C  | -6.11444200 | 0.36430500  | -2.56384800 |
| H  | -5.57394000 | 1.69081800  | -0.96306900 |
| C  | -5.77996300 | -0.76830500 | -3.28701700 |
| H  | -4.35996900 | -2.36582000 | -3.55105900 |
| H  | -7.02096000 | 0.92489800  | -2.80771300 |
| H  | -6.42167000 | -1.10238500 | -4.10682200 |
| C  | -3.69254200 | -0.19921700 | 1.61644700  |
| C  | -2.88696600 | -0.18113300 | 2.75358100  |
| C  | -4.94827600 | -0.79409900 | 1.67886100  |
| C  | -3.33817800 | -0.73088000 | 3.93874600  |
| H  | -1.89167000 | 0.27810300  | 2.70644100  |
| C  | -5.39105700 | -1.35461000 | 2.86601100  |
| H  | -5.59332300 | -0.81842200 | 0.79445000  |
| C  | -4.59103300 | -1.32189900 | 3.99495600  |
| H  | -2.70106100 | -0.70567800 | 4.82714500  |
| H  | -6.37847700 | -1.82206600 | 2.90626100  |
| H  | -4.94527700 | -1.76452400 | 4.92992400  |
| C  | 2.44052000  | -3.77928500 | -0.07809400 |
| H  | 2.35359200  | -4.73859400 | -0.60137000 |
| N  | 1.49335100  | -2.81936800 | -0.60189800 |
| H  | 2.26550400  | -3.94524800 | 1.00262800  |
| S  | 0.09449100  | -3.32595900 | -1.32565800 |
| O  | -0.35096800 | -2.27142400 | -2.17825300 |

|   |             |             |             |
|---|-------------|-------------|-------------|
| O | 0.37159200  | -4.62401900 | -1.85360000 |
| C | -1.01365700 | -3.51476200 | 0.01063700  |
| H | -0.61275100 | -4.26089000 | 0.70987800  |
| H | -1.15805100 | -2.55028200 | 0.52005900  |
| H | -1.97314100 | -3.87119000 | -0.38844700 |
| C | 2.08553900  | 0.79051200  | -0.43802500 |
| H | 1.86519200  | 1.59483200  | 0.28301000  |
| C | 3.15952900  | 0.96063700  | -1.31108500 |
| H | 3.04602800  | 0.50533100  | -2.30167300 |
| C | 4.03562300  | 2.12570600  | -1.24935700 |
| C | 4.26565900  | 2.79634900  | -0.04590600 |
| C | 4.72263400  | 2.54974700  | -2.38692200 |
| C | 5.13416400  | 3.87062900  | 0.00821900  |
| H | 3.77252200  | 2.45502800  | 0.87138900  |
| C | 5.60314200  | 3.61374100  | -2.32834400 |
| H | 4.55597700  | 2.02674000  | -3.33541700 |
| C | 5.81227000  | 4.27881700  | -1.13011700 |
| H | 5.29992500  | 4.38716600  | 0.95793300  |
| H | 6.13318000  | 3.93149200  | -3.23075700 |
| H | 6.50897900  | 5.12000500  | -1.08254900 |
| C | 6.52394800  | 0.33591400  | -0.25196000 |
| H | 6.60973700  | 1.35448100  | 0.15645100  |
| H | 7.36054600  | -0.26828500 | 0.13384900  |
| H | 6.60411000  | 0.38882000  | -1.34351400 |

### 3-2b-ts

$E_{\text{sol}} = -2681.165221$  Hartree

Thermal correction to Free Energy = 0.582666 Hartree

Sum of electronic and thermal Free Energies = -2680.582555 Hartree

Number of Imaginary Frequencies: 1

|   |            |             |             |
|---|------------|-------------|-------------|
| C | 6.42835800 | -0.36909200 | 2.11050900  |
| C | 5.25711300 | -0.92207800 | 2.60439800  |
| C | 4.16731200 | -1.15283700 | 1.76981200  |
| C | 4.27153200 | -0.81638100 | 0.44008100  |
| C | 5.44955800 | -0.24230900 | -0.02801600 |
| C | 6.54717700 | -0.01143300 | 0.77400500  |
| H | 7.27115200 | -0.19915500 | 2.78485500  |
| H | 5.18935100 | -1.18295200 | 3.66345800  |
| H | 3.23932500 | -1.57086100 | 2.17422100  |
| C | 3.33012100 | -0.97211600 | -0.72741700 |
| C | 4.05346600 | -0.14847200 | -1.76698800 |
| N | 5.29803600 | 0.05713600  | -1.37908300 |
| C | 3.27953000 | -2.44233100 | -1.16455100 |
| H | 2.83296900 | -2.49451300 | -2.17246100 |

|    |             |             |             |
|----|-------------|-------------|-------------|
| H  | 4.28840500  | -2.87964600 | -1.21868100 |
| C  | 0.83796600  | -1.35991900 | -0.33616200 |
| C  | 1.90507900  | -0.50120500 | -0.62270000 |
| H  | 3.83324500  | -0.18203700 | -2.83712400 |
| Au | -1.08175900 | -0.52922300 | -0.19351400 |
| P  | -3.14468400 | 0.59532000  | -0.00535600 |
| C  | -3.08233700 | 1.86391400  | 1.27615200  |
| C  | -4.06563100 | 2.03005800  | 2.24351300  |
| C  | -1.96868800 | 2.70231500  | 1.27907100  |
| C  | -3.93187200 | 3.02293500  | 3.20078400  |
| H  | -4.94555100 | 1.37882900  | 2.25734500  |
| C  | -1.84637500 | 3.69918100  | 2.22746900  |
| H  | -1.18361100 | 2.56618000  | 0.52403700  |
| C  | -2.82778500 | 3.85717000  | 3.19341400  |
| H  | -4.70608700 | 3.14431700  | 3.96356700  |
| H  | -0.97038700 | 4.35340100  | 2.21869300  |
| H  | -2.72755100 | 4.63778000  | 3.95262500  |
| C  | -3.60545700 | 1.46795100  | -1.51768700 |
| C  | -3.33108400 | 0.85151500  | -2.73656400 |
| C  | -4.21125100 | 2.72106000  | -1.50301300 |
| C  | -3.66537400 | 1.47638300  | -3.92417600 |
| H  | -2.84392200 | -0.13102000 | -2.75066800 |
| C  | -4.53634100 | 3.34578300  | -2.69551500 |
| H  | -4.42789800 | 3.21716800  | -0.55116600 |
| C  | -4.26591700 | 2.72564500  | -3.90399300 |
| H  | -3.44648400 | 0.98561000  | -4.87610700 |
| H  | -5.00751700 | 4.33192900  | -2.67822800 |
| H  | -4.51938800 | 3.22532300  | -4.84267200 |
| C  | -4.53375800 | -0.48118700 | 0.40015000  |
| C  | -4.27884400 | -1.65208100 | 1.10924000  |
| C  | -5.84268500 | -0.16152200 | 0.05027500  |
| C  | -5.32139700 | -2.48416600 | 1.47611100  |
| H  | -3.24526200 | -1.91777500 | 1.36752400  |
| C  | -6.88149500 | -1.00065500 | 0.41363600  |
| H  | -6.05327800 | 0.75376000  | -0.51333000 |
| C  | -6.62180500 | -2.15901400 | 1.12803500  |
| H  | -5.11441800 | -3.40322700 | 2.03055500  |
| H  | -7.90709500 | -0.74638700 | 0.13279100  |
| H  | -7.44404200 | -2.82197500 | 1.41031000  |
| C  | 2.44977100  | -3.24634900 | -0.21292000 |
| H  | 2.33040400  | -4.26215500 | -0.61068600 |
| N  | 1.12783800  | -2.65019600 | -0.07382500 |
| H  | 2.92649600  | -3.34528300 | 0.77909600  |
| S  | -0.09236700 | -3.67884400 | 0.48726700  |

|   |             |             |             |
|---|-------------|-------------|-------------|
| O | -1.28250300 | -3.43927900 | -0.26645000 |
| O | 0.49580400  | -4.97901900 | 0.51400800  |
| C | -0.32982700 | -3.12969000 | 2.12858600  |
| H | 0.61470400  | -3.22220500 | 2.68010200  |
| H | -0.67789300 | -2.08712300 | 2.12862900  |
| H | -1.08950100 | -3.77737900 | 2.58619000  |
| C | 6.35253100  | 0.56547100  | -2.19462800 |
| H | 6.81736500  | 1.44181800  | -1.72074000 |
| H | 7.12381800  | -0.20622700 | -2.34091100 |
| H | 5.94856100  | 0.86277500  | -3.16810600 |
| C | 1.69470400  | 0.79037600  | -1.10976900 |
| H | 0.69723600  | 1.01819700  | -1.51930500 |
| C | 2.73176700  | 1.69690300  | -1.32060000 |
| H | 2.56895100  | 2.39738800  | -2.15306800 |
| C | 3.62634200  | 2.24063600  | -0.30863700 |
| C | 3.41762200  | 2.06886500  | 1.06330800  |
| C | 4.70226600  | 3.03844900  | -0.70828900 |
| C | 4.26333800  | 2.64876800  | 1.98825700  |
| H | 2.56788400  | 1.46654000  | 1.40337400  |
| C | 5.54774700  | 3.61944500  | 0.21879100  |
| H | 4.86624500  | 3.20517600  | -1.77937700 |
| C | 5.33828400  | 3.42239400  | 1.57452500  |
| H | 4.07446100  | 2.50190400  | 3.05621600  |
| H | 6.37963900  | 4.24281500  | -0.12286300 |
| H | 6.00158100  | 3.88496100  | 2.31029900  |
| H | 7.46056800  | 0.44455500  | 0.38446700  |

### 3-3a

$E_{\text{sol}} = -2681.201514$  Hartree

Thermal correction to Free Energy = 0.582832 Hartree

Sum of electronic and thermal Free Energies = -2680.618682 Hartree

Number of Imaginary Frequencies: 0

|   |            |             |            |
|---|------------|-------------|------------|
| C | 2.66690800 | -0.79784800 | 4.40022200 |
| C | 2.02170900 | -1.90714100 | 3.87095800 |
| C | 2.17852500 | -2.22126300 | 2.52729200 |
| C | 2.98049600 | -1.41704400 | 1.74454200 |
| C | 3.57886200 | -0.27337100 | 2.26556200 |
| C | 3.45293300 | 0.02964100  | 3.61584000 |
| H | 2.55254800 | -0.56606900 | 5.46298200 |
| H | 1.40175300 | -2.53876300 | 4.51152000 |
| H | 1.68199300 | -3.10537400 | 2.11032100 |
| H | 3.94661700 | 0.90308600  | 4.04841100 |
| C | 3.36379700 | -1.53850500 | 0.29352000 |
| C | 4.25669400 | -0.29785000 | 0.06401000 |



|    |             |             |             |
|----|-------------|-------------|-------------|
| N  | 4.25927200  | 0.43778200  | 1.31304200  |
| C  | 3.96235700  | -2.87332800 | -0.13032200 |
| H  | 4.62991100  | -2.71205000 | -0.99252900 |
| H  | 4.54581700  | -3.34509300 | 0.67033600  |
| C  | 2.09603900  | -1.47087800 | -0.51257800 |
| C  | 1.40607500  | -0.24200400 | -0.65629400 |
| H  | 5.28399600  | -0.64052800 | -0.18438400 |
| Au | -0.63054900 | 0.10276500  | -0.33356300 |
| P  | -2.89909900 | 0.58685900  | 0.07158700  |
| C  | -3.19721100 | 2.35958200  | 0.24427000  |
| C  | -4.01752800 | 2.89348400  | 1.23251600  |
| C  | -2.57757600 | 3.21170100  | -0.66802800 |
| C  | -4.21472200 | 4.26289600  | 1.30275500  |
| H  | -4.50956700 | 2.23691700  | 1.95701200  |
| C  | -2.78727100 | 4.57644100  | -0.60024800 |
| H  | -1.92226400 | 2.79542200  | -1.44312600 |
| C  | -3.60478600 | 5.10378200  | 0.38768200  |
| H  | -4.85769700 | 4.67617100  | 2.08430400  |
| H  | -2.30028300 | 5.23683300  | -1.32247100 |
| H  | -3.76272800 | 6.18389500  | 0.44728000  |
| C  | -4.01198200 | 0.04875100  | -1.24422200 |
| C  | -3.68466900 | -1.09022700 | -1.97442600 |
| C  | -5.18650400 | 0.73615000  | -1.53799100 |
| C  | -4.52476900 | -1.54178200 | -2.97650800 |
| H  | -2.74988600 | -1.62445500 | -1.76019900 |
| C  | -6.02054200 | 0.28487600  | -2.54571400 |
| H  | -5.45487200 | 1.63452700  | -0.97194300 |
| C  | -5.69079900 | -0.85157500 | -3.26517200 |
| H  | -4.25911500 | -2.43486000 | -3.54855800 |
| H  | -6.93939000 | 0.83208300  | -2.77261200 |
| H  | -6.34866000 | -1.20183800 | -4.06504400 |
| C  | -3.52246000 | -0.15884400 | 1.59286300  |
| C  | -2.68304300 | -0.15268900 | 2.70511600  |
| C  | -4.79839300 | -0.70126900 | 1.70156100  |
| C  | -3.12095600 | -0.66521600 | 3.91207500  |
| H  | -1.67189100 | 0.26412000  | 2.62004500  |
| C  | -5.22700800 | -1.22569900 | 2.90959000  |
| H  | -5.46976500 | -0.71559700 | 0.83679500  |
| C  | -4.39285300 | -1.20607500 | 4.01412200  |
| H  | -2.45755100 | -0.65050500 | 4.78101700  |
| H  | -6.23038100 | -1.65320900 | 2.98654500  |
| H  | -4.73608900 | -1.61923000 | 4.96659700  |
| C  | 2.77855600  | -3.70408000 | -0.55365200 |
| H  | 2.97852200  | -4.35165400 | -1.41599500 |

|   |             |             |             |
|---|-------------|-------------|-------------|
| N | 1.79848200  | -2.68432700 | -0.92657100 |
| H | 2.36350800  | -4.32763000 | 0.25680600  |
| S | 0.40712300  | -3.16683400 | -1.81295000 |
| O | -0.03244300 | -2.03644700 | -2.55582900 |
| O | 0.80679900  | -4.37312100 | -2.45343600 |
| C | -0.69465600 | -3.53739900 | -0.51522000 |
| H | -0.26348600 | -4.33443800 | 0.10437700  |
| H | -0.89312200 | -2.63326800 | 0.07962600  |
| H | -1.62649200 | -3.89889100 | -0.97153700 |
| C | 2.26394800  | 0.77470700  | -0.89756500 |
| H | 1.88176000  | 1.79998600  | -0.98053200 |
| C | 3.73238400  | 0.56352800  | -1.10495700 |
| H | 3.88668000  | -0.04649700 | -2.01835000 |
| C | 4.51368800  | 1.83276700  | -1.27125700 |
| C | 4.19974800  | 2.97759000  | -0.54512900 |
| C | 5.61544200  | 1.86284800  | -2.11883100 |
| C | 4.97247900  | 4.12001900  | -0.66088800 |
| H | 3.35179100  | 2.96987600  | 0.14777300  |
| C | 6.39059700  | 3.00383900  | -2.23418200 |
| H | 5.86763600  | 0.96815800  | -2.70026100 |
| C | 6.07116500  | 4.13640100  | -1.50366000 |
| H | 4.71433100  | 5.01013100  | -0.07956200 |
| H | 7.25238100  | 3.01026200  | -2.90779000 |
| H | 6.68033400  | 5.03976100  | -1.59543900 |
| C | 5.48316400  | 1.06769400  | 1.71024100  |
| H | 5.28250700  | 1.92060800  | 2.37620900  |
| H | 6.16467800  | 0.36818400  | 2.23688900  |
| H | 6.00624900  | 1.46470300  | 0.83184600  |

### 3-3b

$E_{\text{sol}} = -2681.213781$  Hartree

Thermal correction to Free Energy = 0.585434 Hartree

Sum of electronic and thermal Free Energies = -2680.628347 Hartree

Number of Imaginary Frequencies: 0

|   |            |             |             |
|---|------------|-------------|-------------|
| C | 5.62033600 | -0.84676600 | 2.80730900  |
| C | 4.40365700 | -1.50311300 | 2.90042700  |
| C | 3.61364400 | -1.65730700 | 1.76246900  |
| C | 4.05943300 | -1.16228000 | 0.55889200  |
| C | 5.26896300 | -0.46257800 | 0.48692600  |
| C | 6.07117100 | -0.30792700 | 1.61007000  |
| H | 6.23492000 | -0.72701900 | 3.70451800  |
| H | 4.06165900 | -1.89237500 | 3.86216400  |
| H | 2.63548100 | -2.15057500 | 1.83954200  |
| C | 3.44707500 | -1.16762800 | -0.81937800 |

|    |             |             |             |
|----|-------------|-------------|-------------|
| C  | 4.27613000  | -0.08957100 | -1.54231800 |
| N  | 5.47424900  | 0.01314700  | -0.76908200 |
| C  | 3.42291300  | -2.53197300 | -1.47946300 |
| H  | 3.14888400  | -2.40806300 | -2.54225700 |
| H  | 4.40633500  | -3.02595800 | -1.44645700 |
| C  | 0.89826200  | -1.45940800 | -0.62151500 |
| C  | 2.04908000  | -0.64001200 | -0.86208600 |
| H  | 4.52041000  | -0.39605300 | -2.57633900 |
| Au | -0.93709700 | -0.51097500 | -0.28582900 |
| P  | -2.95053700 | 0.65822300  | 0.11070000  |
| C  | -2.81893900 | 1.92147700  | 1.39227900  |
| C  | -3.78875200 | 2.10560800  | 2.37047100  |
| C  | -1.69011100 | 2.73795600  | 1.38190000  |
| C  | -3.62672000 | 3.09479500  | 3.32598600  |
| H  | -4.68057000 | 1.47131900  | 2.39318900  |
| C  | -1.53945200 | 3.73192800  | 2.32997900  |
| H  | -0.91776600 | 2.58907900  | 0.61688700  |
| C  | -2.50702800 | 3.90777400  | 3.30642000  |
| H  | -4.39038200 | 3.23043700  | 4.09682000  |
| H  | -0.65178800 | 4.37005200  | 2.31221200  |
| H  | -2.38347300 | 4.68600000  | 4.06468300  |
| C  | -3.52261100 | 1.50996900  | -1.37291200 |
| C  | -3.36014800 | 0.85621200  | -2.59244700 |
| C  | -4.12892500 | 2.76192600  | -1.33847400 |
| C  | -3.81073400 | 1.44043100  | -3.76158500 |
| H  | -2.87724500 | -0.12852700 | -2.62064800 |
| C  | -4.57167000 | 3.34547400  | -2.51380400 |
| H  | -4.25955400 | 3.28552100  | -0.38581100 |
| C  | -4.41418100 | 2.68784400  | -3.72260700 |
| H  | -3.68224800 | 0.91969800  | -4.71397800 |
| H  | -5.04657400 | 4.32954100  | -2.48291500 |
| H  | -4.76336600 | 3.15519000  | -4.64719900 |
| C  | -4.30848100 | -0.42352100 | 0.60387600  |
| C  | -4.01948500 | -1.55914900 | 1.35508400  |
| C  | -5.62996700 | -0.13725100 | 0.27394500  |
| C  | -5.03891600 | -2.39225500 | 1.77875600  |
| H  | -2.97688900 | -1.79234200 | 1.60847900  |
| C  | -6.64621700 | -0.97645800 | 0.69560300  |
| H  | -5.86944800 | 0.75149600  | -0.31981400 |
| C  | -6.35209100 | -2.10182200 | 1.44746800  |
| H  | -4.80482000 | -3.28326500 | 2.36746600  |
| H  | -7.68207500 | -0.74775700 | 0.43074900  |
| H  | -7.15668500 | -2.76513700 | 1.77579900  |
| C  | 2.42311100  | -3.42657800 | -0.80416700 |

|   |             |             |             |
|---|-------------|-------------|-------------|
| H | 2.23948500  | -4.32491100 | -1.40679800 |
| N | 1.13429400  | -2.75530900 | -0.60317600 |
| H | 2.78718100  | -3.77162500 | 0.18066300  |
| S | -0.18537800 | -3.82641500 | -0.22903800 |
| O | -1.34503200 | -3.31628500 | -0.88222800 |
| O | 0.30326200  | -5.13311200 | -0.51663600 |
| C | -0.31442500 | -3.60194400 | 1.49582300  |
| H | 0.60973800  | -3.95168800 | 1.97454800  |
| H | -0.49524000 | -2.54030000 | 1.71661200  |
| H | -1.16071500 | -4.20960600 | 1.84358700  |
| C | 6.53870700  | 0.89169700  | -1.08980400 |
| H | 6.54792400  | 1.81230400  | -0.47177600 |
| H | 7.51491100  | 0.39252000  | -0.95809300 |
| H | 6.46149800  | 1.19367300  | -2.14302100 |
| C | 2.01129300  | 0.64175500  | -1.26185800 |
| H | 1.09077400  | 1.23076100  | -1.35935700 |
| C | 3.35019700  | 1.17714200  | -1.61777600 |
| H | 3.31041000  | 1.53060100  | -2.66615100 |
| C | 3.75863700  | 2.35754700  | -0.77929800 |
| C | 3.63613000  | 2.33874800  | 0.60686300  |
| C | 4.30020100  | 3.48553700  | -1.38714500 |
| C | 4.06725000  | 3.41299500  | 1.36593900  |
| H | 3.20414300  | 1.46248800  | 1.10428600  |
| C | 4.72928900  | 4.56104000  | -0.62999100 |
| H | 4.39467500  | 3.51019100  | -2.47849600 |
| C | 4.61920400  | 4.52467700  | 0.75057100  |
| H | 3.97194100  | 3.37970900  | 2.45485700  |
| H | 5.15708300  | 5.43812500  | -1.12336900 |
| H | 4.96074500  | 5.37176500  | 1.35197900  |
| H | 7.01473300  | 0.24139100  | 1.56221200  |

### 3-4a

$E_{\text{sol}} = -1509.502276$  Hartree

Thermal correction to Free Energy = 0.339367 Hartree

Sum of electronic and thermal Free Energies = -1509.162909 Hartree

Number of Imaginary Frequencies: 0

|   |             |            |             |
|---|-------------|------------|-------------|
| C | 0.47515400  | 3.93475100 | -1.18070600 |
| C | -0.76792100 | 3.41239200 | -1.50168400 |
| C | -1.18544700 | 2.20663200 | -0.93404500 |
| C | -0.34297300 | 1.54912500 | -0.06865700 |
| C | 0.91446400  | 2.07871900 | 0.24164200  |
| C | 1.34019600  | 3.28046000 | -0.30879000 |
| H | 0.79537000  | 4.87911200 | -1.63442300 |
| H | -1.42031800 | 3.94096400 | -2.20222600 |

|   |             |             |             |
|---|-------------|-------------|-------------|
| H | -2.16859400 | 1.79144100  | -1.18703400 |
| H | 2.32705100  | 3.69415300  | -0.08151700 |
| C | -0.51926200 | 0.31370000  | 0.79636100  |
| C | 0.94873100  | -0.05578100 | 1.05901800  |
| N | 1.55205400  | 1.26816500  | 1.13343900  |
| C | -1.34814100 | 0.64150600  | 2.03818600  |
| H | -1.13847500 | -0.10168300 | 2.82834400  |
| H | -1.15096500 | 1.64627500  | 2.43929500  |
| C | -1.34371500 | -0.74926300 | 0.13772100  |
| C | -0.79972500 | -1.61069000 | -0.73620900 |
| H | 1.08090100  | -0.55660500 | 2.04234600  |
| C | -2.76842600 | 0.48168800  | 1.55158100  |
| H | -3.47822700 | 0.21394500  | 2.34613000  |
| N | -2.63474300 | -0.62055600 | 0.60719600  |
| H | -3.14315900 | 1.39687100  | 1.04895800  |
| S | -3.96509500 | -1.23809800 | -0.14890900 |
| O | -3.66707500 | -2.58987900 | -0.50429200 |
| O | -5.06151900 | -0.92645200 | 0.71169000  |
| C | -4.11154900 | -0.30391500 | -1.62244500 |
| H | -4.31309200 | 0.74723600  | -1.37305000 |
| H | -3.18724100 | -0.39659500 | -2.21080600 |
| H | -4.95348300 | -0.71385900 | -2.19729500 |
| C | 0.63208200  | -1.59004300 | -0.87949400 |
| H | 1.06181100  | -2.25828900 | -1.63788800 |
| C | 1.48445000  | -0.93062400 | -0.06651000 |
| C | 2.92887500  | -1.15732800 | -0.19381100 |
| C | 3.55396600  | -1.10818700 | -1.44401200 |
| C | 3.71518700  | -1.47173600 | 0.91945700  |
| C | 4.91027400  | -1.35853100 | -1.57409300 |
| H | 2.95735000  | -0.84510300 | -2.32557700 |
| C | 5.07031100  | -1.71770300 | 0.78897700  |
| H | 3.24856500  | -1.54130800 | 1.90900100  |
| C | 5.67686000  | -1.65880700 | -0.45850400 |
| H | 5.37828100  | -1.30508800 | -2.56290500 |
| H | 5.66311700  | -1.96810200 | 1.67553900  |
| H | 6.75018700  | -1.84781400 | -0.55974500 |
| C | 2.89236200  | 1.51560300  | 1.52287500  |
| H | 3.64067200  | 1.40185400  | 0.71022600  |
| H | 2.97385300  | 2.54734900  | 1.90815200  |
| H | 3.17309300  | 0.83983800  | 2.34331000  |
| H | -1.38212500 | -2.36946200 | -1.26105900 |

### 3-4b

$E_{\text{sol}} = -1509.508790$  Hartree

Thermal correction to Free Energy = 0.339665 Hartree

Sum of electronic and thermal Free Energies = -1509.169125 Hartree

Number of Imaginary Frequencies: 0

|   |             |             |             |
|---|-------------|-------------|-------------|
| C | 0.34628500  | 4.03941500  | -1.15958100 |
| C | -0.84578400 | 3.39567000  | -1.45524800 |
| C | -1.11914800 | 2.15160400  | -0.88707900 |
| C | -0.20693400 | 1.58609400  | -0.02498500 |
| C | 1.00598300  | 2.23008600  | 0.24402100  |
| C | 1.29625700  | 3.46781900  | -0.31975200 |
| H | 0.56146300  | 5.01191900  | -1.61618600 |
| H | -1.56130600 | 3.85431300  | -2.14381100 |
| H | -2.04084100 | 1.61648400  | -1.14950300 |
| C | -0.23969000 | 0.27953800  | 0.73716200  |
| C | 1.25634000  | 0.12425800  | 1.10300300  |
| N | 1.76197700  | 1.47878800  | 1.09525100  |
| C | -1.23084400 | 0.25660300  | 1.89017300  |
| H | -1.02691100 | -0.63060900 | 2.51769400  |
| H | -1.13518700 | 1.14654500  | 2.53459600  |
| C | -1.75181700 | -1.41508600 | -0.26845100 |
| C | -0.52395800 | -0.88602400 | -0.15727700 |
| H | 1.41162400  | -0.31208800 | 2.11249900  |
| C | -2.64521000 | 0.19357800  | 1.36958300  |
| H | -3.36034300 | 0.09163300  | 2.19915600  |
| N | -2.81775400 | -0.95217100 | 0.48927800  |
| H | -2.89245400 | 1.13777100  | 0.84122900  |
| S | -4.33751000 | -1.20223800 | -0.10873500 |
| O | -4.33634300 | -2.50784200 | -0.68991700 |
| O | -5.23760800 | -0.86640400 | 0.94858400  |
| C | -4.52883200 | -0.02761100 | -1.40043000 |
| H | -4.45456300 | 0.99114000  | -0.99385100 |
| H | -3.76089900 | -0.19733400 | -2.16839500 |
| H | -5.52576600 | -0.16786600 | -1.84244300 |
| C | 3.11833500  | 1.79495900  | 1.35872700  |
| H | 3.79279700  | 1.67045500  | 0.48420100  |
| H | 3.19851700  | 2.84195700  | 1.69766000  |
| H | 3.49609800  | 1.16019900  | 2.17367200  |
| C | 0.72868400  | -1.37919100 | -0.64033800 |
| H | 0.82562600  | -2.17382800 | -1.38849100 |
| C | 1.76766100  | -0.82178500 | 0.02226500  |
| C | 3.16393300  | -1.18321600 | -0.17980400 |
| C | 3.65322400  | -1.43372100 | -1.46722900 |
| C | 4.04501300  | -1.32923100 | 0.89834100  |
| C | 4.96826900  | -1.81521200 | -1.66817200 |
| H | 2.98438600  | -1.30160500 | -2.32518600 |

|   |             |             |             |
|---|-------------|-------------|-------------|
| C | 5.35919500  | -1.71219200 | 0.69449600  |
| H | 3.68259800  | -1.16713700 | 1.91992300  |
| C | 5.82955500  | -1.95351700 | -0.58875400 |
| H | 5.32931800  | -1.99704100 | -2.68577900 |
| H | 6.02753000  | -1.83040000 | 1.55353700  |
| H | 6.87138600  | -2.24890100 | -0.74723500 |
| H | 2.24739200  | 3.97392200  | -0.12896300 |
| H | -1.96737000 | -2.30309900 | -0.86962500 |

#### 4-1

$E_{\text{sol}} = -2603.779477$  Hartree

Thermal correction to Free Energy = 0.546369 Hartree

Sum of electronic and thermal Free Energies = -2603.233108 Hartree

Number of Imaginary Frequencies: 0

|    |             |             |             |
|----|-------------|-------------|-------------|
| C  | 6.08919800  | -2.22057500 | -0.57840900 |
| C  | 6.33363200  | -0.98183000 | -1.18052100 |
| C  | 5.79053900  | 0.18016300  | -0.67277200 |
| C  | 4.98145100  | 0.10748700  | 0.46180900  |
| C  | 4.75098000  | -1.15553700 | 1.05262100  |
| C  | 5.29563500  | -2.32741100 | 0.54627000  |
| H  | 6.53533000  | -3.12200400 | -1.00789400 |
| H  | 6.97265000  | -0.93776700 | -2.06736000 |
| H  | 5.99893700  | 1.14372000  | -1.15010700 |
| C  | 4.26562500  | 1.06388000  | 1.23958600  |
| C  | 3.64946900  | 0.35499400  | 2.23205200  |
| N  | 3.93675600  | -0.97032700 | 2.12252300  |
| C  | 4.16802500  | 2.51981400  | 0.98260500  |
| H  | 3.71249500  | 3.03513400  | 1.84466400  |
| H  | 5.17601200  | 2.95812600  | 0.85995800  |
| C  | 1.53697700  | 1.37064900  | -0.45880500 |
| C  | 1.77169000  | 0.17684900  | -0.68950700 |
| H  | 3.01393200  | 0.70294900  | 3.04594200  |
| Au | -0.59717600 | 0.57399400  | -0.18578000 |
| P  | -2.71275100 | -0.37570500 | 0.09217800  |
| C  | -4.00768200 | 0.82167000  | 0.44757500  |
| C  | -5.24780500 | 0.42503500  | 0.94424700  |
| C  | -3.75956600 | 2.16844700  | 0.20280900  |
| C  | -6.22702100 | 1.37122000  | 1.18210400  |
| H  | -5.45202200 | -0.63216400 | 1.14556300  |
| C  | -4.74468600 | 3.11052700  | 0.44186000  |
| H  | -2.77665700 | 2.47965900  | -0.17266800 |
| C  | -5.97670300 | 2.71158100  | 0.93098400  |
| H  | -7.19929700 | 1.05797600  | 1.57127200  |
| H  | -4.54336900 | 4.16775700  | 0.25097100  |

|   |             |             |             |
|---|-------------|-------------|-------------|
| H | -6.75406000 | 3.45581100  | 1.12479600  |
| C | -3.22432000 | -1.30217800 | -1.36818900 |
| C | -2.40570600 | -2.35211300 | -1.78376400 |
| C | -4.36004900 | -0.98424800 | -2.10199100 |
| C | -2.73397400 | -3.08640600 | -2.90585300 |
| H | -1.49961600 | -2.59905400 | -1.21397600 |
| C | -4.67650200 | -1.71698600 | -3.23469400 |
| H | -5.00773900 | -0.15882000 | -1.79105200 |
| C | -3.87040200 | -2.76780400 | -3.63421200 |
| H | -2.09207000 | -3.91313300 | -3.22098100 |
| H | -5.57120100 | -1.46222500 | -3.80923200 |
| H | -4.12569500 | -3.34505900 | -4.52709000 |
| C | -2.71785300 | -1.56381200 | 1.45073500  |
| C | -1.93431500 | -1.27576600 | 2.56545300  |
| C | -3.49367400 | -2.71881000 | 1.43450200  |
| C | -1.93592600 | -2.12489600 | 3.65636700  |
| H | -1.31480400 | -0.37003900 | 2.57288600  |
| C | -3.48434200 | -3.56963700 | 2.52645300  |
| H | -4.11054300 | -2.95849100 | 0.56210600  |
| C | -2.71058900 | -3.27318800 | 3.63605000  |
| H | -1.32037200 | -1.89094000 | 4.52904600  |
| H | -4.09382200 | -4.47730000 | 2.50911000  |
| H | -2.70620400 | -3.95015900 | 4.49456700  |
| C | 3.39040400  | 2.88976300  | -0.26098100 |
| H | 3.48687700  | 3.96961400  | -0.44794100 |
| N | 1.96013600  | 2.59760000  | -0.12498800 |
| H | 3.76620500  | 2.35728100  | -1.15419300 |
| S | 0.88126500  | 3.86347400  | -0.33148500 |
| O | -0.39189200 | 3.36201700  | 0.09089800  |
| O | 1.47972500  | 4.98560200  | 0.31168900  |
| C | 0.84302600  | 4.12185500  | -2.05798300 |
| H | 1.84275700  | 4.40659700  | -2.41056000 |
| H | 0.50498800  | 3.20333500  | -2.55613900 |
| H | 0.13695600  | 4.93633800  | -2.26492200 |
| C | 3.48128200  | -1.99817800 | 2.99007100  |
| H | 2.91513300  | -2.76671700 | 2.43573900  |
| H | 4.32066200  | -2.49540800 | 3.50241400  |
| H | 2.82102700  | -1.56541000 | 3.75098700  |
| C | 1.98833500  | -1.18229100 | -1.00531900 |
| C | 1.55084800  | -2.20111800 | -0.14668200 |
| C | 2.69720600  | -1.51358300 | -2.16573600 |
| C | 1.81261300  | -3.51932700 | -0.45447400 |
| H | 0.99732400  | -1.93256300 | 0.76083900  |
| C | 2.96904300  | -2.83645000 | -2.45139600 |



|   |            |             |             |
|---|------------|-------------|-------------|
| H | 3.04318300 | -0.71499100 | -2.82751500 |
| C | 2.52427200 | -3.83802400 | -1.60326400 |
| H | 1.46304300 | -4.31168000 | 0.21219600  |
| H | 3.53332800 | -3.08917800 | -3.35244000 |
| H | 2.73398500 | -4.88464200 | -1.83989000 |
| H | 5.10484600 | -3.29650700 | 1.01762400  |

#### 4-1a-ts

$E_{\text{sol}} = -2603.763084$  Hartree

Thermal correction to Free Energy = 0.545082 Hartree

Sum of electronic and thermal Free Energies = -2603.218002 Hartree

Number of Imaginary Frequencies: 1

|    |             |             |             |
|----|-------------|-------------|-------------|
| C  | 7.03753700  | -0.14884800 | 1.92777500  |
| C  | 6.34367000  | -1.35549500 | 1.85315500  |
| C  | 5.43108800  | -1.60359300 | 0.84242800  |
| C  | 5.21139300  | -0.62007800 | -0.11503600 |
| C  | 5.94603300  | 0.57369100  | -0.02920000 |
| C  | 6.85196400  | 0.83998800  | 0.98029400  |
| H  | 7.74532900  | 0.01571900  | 2.74375200  |
| H  | 6.52536400  | -2.12324800 | 2.61002600  |
| H  | 4.90083700  | -2.56035800 | 0.81378300  |
| H  | 7.39946600  | 1.78465200  | 1.02583200  |
| C  | 4.31807800  | -0.48778700 | -1.25225600 |
| C  | 4.64232600  | 0.76701500  | -1.79815500 |
| N  | 5.57563000  | 1.37603300  | -1.08140800 |
| C  | 3.83335600  | -1.61339400 | -2.11060000 |
| H  | 3.26585300  | -1.18709100 | -2.95324800 |
| H  | 4.67107400  | -2.18434200 | -2.54123400 |
| C  | 2.38055700  | -0.40732800 | -0.46878100 |
| C  | 1.70018200  | 0.69053000  | -0.30087600 |
| H  | 4.22775800  | 1.24761400  | -2.68437700 |
| Au | -0.41513600 | 0.50665500  | -0.26563400 |
| P  | -2.75784600 | 0.36182300  | -0.07818700 |
| C  | -3.54171900 | 1.96781600  | 0.17136400  |
| C  | -4.68871500 | 2.12371700  | 0.94495900  |
| C  | -2.98250400 | 3.07750500  | -0.45764800 |
| C  | -5.26631900 | 3.37391100  | 1.08161900  |
| H  | -5.13827500 | 1.26035600  | 1.44627400  |
| C  | -3.56708800 | 4.32351900  | -0.32326600 |
| H  | -2.07450600 | 2.95826800  | -1.06169500 |
| C  | -4.70771100 | 4.47257000  | 0.44942800  |
| H  | -6.16520100 | 3.49049700  | 1.69243700  |
| H  | -3.12190800 | 5.18959700  | -0.81984200 |
| H  | -5.16549200 | 5.45929600  | 0.56304800  |

|   |             |             |             |
|---|-------------|-------------|-------------|
| C | -3.56834500 | -0.36502400 | -1.51883000 |
| C | -3.02702200 | -1.53430700 | -2.04983700 |
| C | -4.70562800 | 0.18801100  | -2.09661900 |
| C | -3.62370900 | -2.14637300 | -3.13597400 |
| H | -2.13066600 | -1.97428600 | -1.59614400 |
| C | -5.29358100 | -0.42452000 | -3.19094900 |
| H | -5.14219700 | 1.10547900  | -1.68977100 |
| C | -4.75698100 | -1.59005100 | -3.70925800 |
| H | -3.19566500 | -3.06602900 | -3.54389900 |
| H | -6.18601300 | 0.01742100  | -3.64197800 |
| H | -5.22433300 | -2.07063000 | -4.57298000 |
| C | -3.27033300 | -0.65821700 | 1.32207700  |
| C | -2.50904600 | -0.60088600 | 2.48706600  |
| C | -4.39617800 | -1.47417400 | 1.27960000  |
| C | -2.87551100 | -1.33874300 | 3.59690600  |
| H | -1.61456500 | 0.03392800  | 2.52140900  |
| C | -4.75439600 | -2.21683800 | 2.39139500  |
| H | -5.00216300 | -1.53267400 | 0.36941900  |
| C | -3.99711300 | -2.15034700 | 3.54863800  |
| H | -2.27287100 | -1.28673700 | 4.50762400  |
| H | -5.63891400 | -2.85840200 | 2.35035500  |
| H | -4.28119300 | -2.74299500 | 4.42282100  |
| C | 2.95506100  | -2.54957500 | -1.30902000 |
| H | 2.21617300  | -3.05276700 | -1.95289800 |
| N | 2.28946400  | -1.71953600 | -0.32944400 |
| H | 3.52978300  | -3.33111100 | -0.79097000 |
| S | 1.66485000  | -2.45346600 | 1.07339800  |
| O | 0.24111700  | -2.48386000 | 0.95809200  |
| O | 2.39130800  | -3.67870100 | 1.19440800  |
| C | 2.10783500  | -1.35902800 | 2.35938400  |
| H | 3.19428800  | -1.20401400 | 2.37253900  |
| H | 1.56639000  | -0.41073600 | 2.26362300  |
| H | 1.79842200  | -1.86061400 | 3.28597900  |
| C | 6.10407600  | 2.67668800  | -1.33078100 |
| H | 5.50663200  | 3.16834700  | -2.10648200 |
| H | 6.06825200  | 3.28438200  | -0.41588500 |
| H | 7.14898700  | 2.60859600  | -1.66813900 |
| C | 2.26871400  | 2.01212100  | -0.09445000 |
| C | 3.19228200  | 2.23911300  | 0.93001300  |
| C | 1.87027200  | 3.09388800  | -0.88254700 |
| C | 3.70579200  | 3.50302200  | 1.14988000  |
| H | 3.50660100  | 1.39913900  | 1.56147600  |
| C | 2.40717400  | 4.35199800  | -0.67725400 |
| H | 1.13324600  | 2.92896700  | -1.67696700 |

|   |            |            |             |
|---|------------|------------|-------------|
| C | 3.31958700 | 4.56393200 | 0.34418900  |
| H | 4.42560400 | 3.66098800 | 1.95889000  |
| H | 2.09585100 | 5.18404400 | -1.31522200 |
| H | 3.72871300 | 5.56309400 | 0.51735100  |

#### 4-1b-ts

$E_{\text{sol}} = -2603.766657$  Hartree

Thermal correction to Free Energy = 0.546929 Hartree

Sum of electronic and thermal Free Energies = -2603.219728 Hartree

Number of Imaginary Frequencies: 1

|    |             |             |             |
|----|-------------|-------------|-------------|
| C  | -6.01493300 | 1.20139100  | -1.97155100 |
| C  | -5.53714700 | 0.09812300  | -2.68094300 |
| C  | -4.90817900 | -0.95259800 | -2.04022700 |
| C  | -4.76492000 | -0.89749200 | -0.65912500 |
| C  | -5.26805900 | 0.21809200  | 0.03156000  |
| C  | -5.88994700 | 1.28105200  | -0.59726200 |
| H  | -6.50191100 | 2.01659900  | -2.51320800 |
| H  | -5.66418600 | 0.06836500  | -3.76623100 |
| H  | -4.53031700 | -1.80681100 | -2.61059300 |
| C  | -4.12761300 | -1.74192100 | 0.31738100  |
| C  | -4.37367600 | -1.11878800 | 1.54267700  |
| N  | -5.01120200 | 0.03677600  | 1.36938400  |
| C  | -3.84509000 | -3.20180800 | 0.18965000  |
| H  | -3.77569700 | -3.64709100 | 1.19600000  |
| H  | -4.70803700 | -3.68066700 | -0.30538200 |
| C  | -1.15673300 | -1.83772100 | 0.17353200  |
| C  | -2.00379600 | -0.86482100 | 0.24827800  |
| H  | -4.10423100 | -1.45698300 | 2.54305600  |
| Au | 0.75972500  | -0.85321400 | 0.08799900  |
| P  | 2.76462700  | 0.35069100  | -0.06696400 |
| C  | 2.52276200  | 1.98446400  | -0.79958800 |
| C  | 3.52677300  | 2.61140200  | -1.53323400 |
| C  | 1.29878600  | 2.62487100  | -0.62370800 |
| C  | 3.30905900  | 3.86613100  | -2.07400200 |
| H  | 4.48938000  | 2.11140500  | -1.68578500 |
| C  | 1.08687300  | 3.87946100  | -1.16596800 |
| H  | 0.50110700  | 2.12879500  | -0.05480900 |
| C  | 2.09086800  | 4.50006100  | -1.89116800 |
| H  | 4.10085700  | 4.35251700  | -2.64992300 |
| H  | 0.12045800  | 4.37374500  | -1.02626800 |
| H  | 1.91920600  | 5.48829400  | -2.32719000 |
| C  | 3.56592700  | 0.60210700  | 1.52837800  |
| C  | 3.39097800  | -0.37500100 | 2.50448100  |
| C  | 4.35719300  | 1.71333500  | 1.80266700  |

|   |             |             |             |
|---|-------------|-------------|-------------|
| C | 4.01009300  | -0.24981900 | 3.73485500  |
| H | 2.75776200  | -1.24498700 | 2.29296400  |
| C | 4.96681400  | 1.83816300  | 3.03889800  |
| H | 4.49726400  | 2.49335200  | 1.04705300  |
| C | 4.79560200  | 0.85895400  | 4.00335000  |
| H | 3.86874900  | -1.02243600 | 4.49547200  |
| H | 5.58269500  | 2.71612700  | 3.25148200  |
| H | 5.27711100  | 0.96390000  | 4.97958400  |
| C | 3.98563200  | -0.45160000 | -1.12622400 |
| C | 3.58413300  | -0.79858100 | -2.41567300 |
| C | 5.28286100  | -0.73276000 | -0.71444900 |
| C | 4.47316800  | -1.40067400 | -3.28475100 |
| H | 2.55979400  | -0.58199200 | -2.74328000 |
| C | 6.16642800  | -1.34877500 | -1.58676100 |
| H | 5.61360300  | -0.47085900 | 0.29557200  |
| C | 5.76711200  | -1.67829700 | -2.87005300 |
| H | 4.15191500  | -1.66127500 | -4.29664100 |
| H | 7.18454100  | -1.56942900 | -1.25537000 |
| H | 6.46908500  | -2.16148700 | -3.55474700 |
| C | -2.61005400 | -3.58680400 | -0.57716100 |
| H | -2.58915500 | -4.67906900 | -0.69051600 |
| N | -1.41457400 | -3.18591200 | 0.13984200  |
| H | -2.60489100 | -3.12803400 | -1.58797200 |
| S | -0.10658400 | -4.20909500 | 0.08494900  |
| O | 0.85746100  | -3.66579600 | 0.99258400  |
| O | -0.63349700 | -5.52303200 | 0.27681900  |
| C | 0.51707100  | -4.08792900 | -1.54574300 |
| H | -0.23779400 | -4.44996200 | -2.25630500 |
| H | 0.78347100  | -3.04242500 | -1.76439000 |
| H | 1.41598200  | -4.71440700 | -1.61497200 |
| C | -5.42231000 | 0.93280200  | 2.39874100  |
| H | -5.08251600 | 1.95560800  | 2.17798300  |
| H | -6.51917400 | 0.94126900  | 2.48535900  |
| H | -4.99186200 | 0.61257800  | 3.35376800  |
| H | -6.26386600 | 2.14252100  | -0.03825300 |
| C | -2.18537400 | 0.54039500  | 0.09066400  |
| C | -2.23948200 | 1.09971400  | -1.19501900 |
| C | -2.32774400 | 1.37737400  | 1.20216600  |
| C | -2.43146200 | 2.45548100  | -1.35808800 |
| H | -2.12857800 | 0.44062800  | -2.06118300 |
| C | -2.51259200 | 2.73642600  | 1.03229000  |
| H | -2.28235700 | 0.94124700  | 2.20525300  |
| C | -2.57792200 | 3.27372600  | -0.24501700 |
| H | -2.47078600 | 2.88349000  | -2.36290400 |

|   |             |            |             |
|---|-------------|------------|-------------|
| H | -2.61097800 | 3.38569100 | 1.90606300  |
| H | -2.73862800 | 4.34765300 | -0.37571000 |

#### 4-2a

$E_{\text{sol}} = -2603.796168$  Hartree

Thermal correction to Free Energy = 0.551978 Hartree

Sum of electronic and thermal Free Energies = -2603.244190 Hartree

Number of Imaginary Frequencies: 0

|    |             |             |             |
|----|-------------|-------------|-------------|
| C  | 7.12257200  | -0.54440300 | 1.47802800  |
| C  | 6.29024000  | -1.65402100 | 1.51862400  |
| C  | 5.13948700  | -1.72578400 | 0.74520500  |
| C  | 4.82978300  | -0.65880200 | -0.07511900 |
| C  | 5.69307300  | 0.43033300  | -0.10720700 |
| C  | 6.83668200  | 0.53157300  | 0.65308900  |
| H  | 8.01818600  | -0.51686600 | 2.10292800  |
| H  | 6.54568700  | -2.49162000 | 2.17205100  |
| H  | 4.50818500  | -2.61770600 | 0.79515800  |
| H  | 7.48874500  | 1.40675900  | 0.60736900  |
| C  | 3.71461600  | -0.39125600 | -1.04499500 |
| C  | 4.06575200  | 0.96120300  | -1.51339000 |
| N  | 5.18676900  | 1.36408400  | -1.01945200 |
| C  | 3.70246000  | -1.36949500 | -2.23842500 |
| H  | 3.16350700  | -0.89520300 | -3.07435200 |
| H  | 4.71171000  | -1.63918100 | -2.57717800 |
| C  | 2.26496000  | -0.57848200 | -0.56262400 |
| C  | 1.41697100  | 0.36854800  | -0.14525700 |
| H  | 3.53790000  | 1.55145100  | -2.26499800 |
| Au | -0.66443800 | 0.24500400  | -0.03677800 |
| P  | -3.03228400 | 0.18624300  | 0.00667800  |
| C  | -3.83480300 | 1.79818500  | -0.12854400 |
| C  | -4.95277600 | 2.14622100  | 0.62149400  |
| C  | -3.30752500 | 2.71412000  | -1.03583300 |
| C  | -5.53358500 | 3.39288600  | 0.46200700  |
| H  | -5.37746900 | 1.43723700  | 1.33972700  |
| C  | -3.89740500 | 3.95343900  | -1.19953300 |
| H  | -2.42002600 | 2.44740300  | -1.62336200 |
| C  | -5.00978100 | 4.29521600  | -0.44745100 |
| H  | -6.41051300 | 3.66036900  | 1.05829700  |
| H  | -3.47790300 | 4.66509100  | -1.91611300 |
| H  | -5.47125600 | 5.27932200  | -0.56908800 |
| C  | -3.71686100 | -0.81477400 | -1.33035200 |
| C  | -3.00526600 | -1.95303300 | -1.70179100 |
| C  | -4.91604600 | -0.51476800 | -1.96968400 |
| C  | -3.49463900 | -2.78848300 | -2.68933500 |

|   |             |             |             |
|---|-------------|-------------|-------------|
| H | -2.05714500 | -2.18736000 | -1.20416700 |
| C | -5.39578400 | -1.35073100 | -2.96476400 |
| H | -5.48386600 | 0.37933800  | -1.68979000 |
| C | -4.68857900 | -2.48640100 | -3.32357300 |
| H | -2.93090300 | -3.68216300 | -2.97124400 |
| H | -6.33685400 | -1.11011300 | -3.46653500 |
| H | -5.07101700 | -3.14184100 | -4.11074800 |
| C | -3.68292700 | -0.53807400 | 1.52917300  |
| C | -3.14784000 | -0.09332000 | 2.73686400  |
| C | -4.68827700 | -1.49935700 | 1.53987400  |
| C | -3.62337200 | -0.58960800 | 3.93570200  |
| H | -2.34769100 | 0.65695100  | 2.73400300  |
| C | -5.15182000 | -2.00345600 | 2.74378200  |
| H | -5.11593500 | -1.86224900 | 0.59966700  |
| C | -4.62550200 | -1.54826000 | 3.94005300  |
| H | -3.20140300 | -0.23052200 | 4.87847300  |
| H | -5.93869000 | -2.76246200 | 2.74409100  |
| H | -4.99514000 | -1.94806100 | 4.88851600  |
| C | 2.92881700  | -2.55044800 | -1.70990100 |
| H | 2.41085000  | -3.08651700 | -2.52000200 |
| N | 1.98537900  | -1.93213500 | -0.80121100 |
| H | 3.57691700  | -3.27827400 | -1.19369300 |
| S | 1.19415500  | -2.91939200 | 0.27144800  |
| O | -0.21825300 | -2.83595400 | 0.05101600  |
| O | 1.83327300  | -4.19595500 | 0.13773600  |
| C | 1.51589200  | -2.26955800 | 1.86536200  |
| H | 2.59460600  | -2.19936100 | 2.05098500  |
| H | 1.03213100  | -1.29371400 | 1.99032300  |
| H | 1.07029300  | -2.98723100 | 2.56723300  |
| C | 5.84796200  | 2.59550800  | -1.32749700 |
| H | 5.20961200  | 3.19780600  | -1.98101000 |
| H | 6.04798100  | 3.14409700  | -0.39781100 |
| H | 6.80137800  | 2.38300900  | -1.83008700 |
| C | 2.00375300  | 1.65800400  | 0.21367800  |
| C | 2.94883600  | 1.75556000  | 1.24177400  |
| C | 1.64296600  | 2.83785500  | -0.45173800 |
| C | 3.54185800  | 2.96644800  | 1.55837700  |
| H | 3.21346300  | 0.85081700  | 1.80252100  |
| C | 2.24321700  | 4.04365300  | -0.14256800 |
| H | 0.88656200  | 2.78671000  | -1.24383100 |
| C | 3.19880200  | 4.11464700  | 0.86234400  |
| H | 4.28159500  | 3.01351500  | 2.36369600  |
| H | 1.95883500  | 4.94686200  | -0.69090700 |
| H | 3.66541000  | 5.07133400  | 1.11153600  |

**4-2b** $E_{\text{sol}} = -2603.801460$  Hartree

Thermal correction to Free Energy = 0.548418 Hartree

Sum of electronic and thermal Free Energies = -2603.253042 Hartree

Number of Imaginary Frequencies: 0

|    |             |             |             |
|----|-------------|-------------|-------------|
| C  | -6.75956100 | 2.04409400  | -0.90435800 |
| C  | -6.39619000 | 1.30152500  | -2.01891300 |
| C  | -5.47174300 | 0.26944100  | -1.92485100 |
| C  | -4.92757000 | -0.00482300 | -0.69055900 |
| C  | -5.32257100 | 0.73746600  | 0.41178300  |
| C  | -6.22541500 | 1.77505100  | 0.34742100  |
| H  | -7.48689500 | 2.85265300  | -1.00931100 |
| H  | -6.84263800 | 1.53787800  | -2.98766500 |
| H  | -5.17828700 | -0.30204500 | -2.81042600 |
| C  | -3.88074800 | -0.97568200 | -0.25344700 |
| C  | -3.92182000 | -0.78391300 | 1.21329200  |
| N  | -4.65429700 | 0.23792600  | 1.53728100  |
| C  | -4.02531100 | -2.41076200 | -0.74458800 |
| H  | -4.63849100 | -2.97747300 | -0.02617700 |
| H  | -4.56604000 | -2.41680700 | -1.70380600 |
| C  | -1.40013300 | -1.24139000 | -0.04067800 |
| C  | -2.44174500 | -0.42071100 | -0.35195400 |
| H  | -3.33406900 | -1.32479900 | 1.95704400  |
| Au | 0.53065700  | -0.45308400 | 0.07061100  |
| P  | 2.68479600  | 0.51839600  | 0.09691400  |
| C  | 2.76679700  | 2.05610600  | -0.84651600 |
| C  | 3.94835800  | 2.51499400  | -1.42287100 |
| C  | 1.59990000  | 2.80413400  | -0.98464000 |
| C  | 3.96164500  | 3.71378400  | -2.11457700 |
| H  | 4.86974500  | 1.93063400  | -1.32737100 |
| C  | 1.61927100  | 4.00297000  | -1.67475200 |
| H  | 0.66422100  | 2.43684500  | -0.54372000 |
| C  | 2.79948900  | 4.45886200  | -2.23847300 |
| H  | 4.89253900  | 4.06999200  | -2.56396000 |
| H  | 0.69706700  | 4.58243900  | -1.77977900 |
| H  | 2.81324700  | 5.40324600  | -2.78915200 |
| C  | 3.25861000  | 0.91383600  | 1.76317600  |
| C  | 2.90305600  | 0.04135100  | 2.79067500  |
| C  | 4.02972600  | 2.03410200  | 2.05539700  |
| C  | 3.32025900  | 0.28174500  | 4.08719600  |
| H  | 2.28644700  | -0.83828000 | 2.56677200  |
| C  | 4.43717100  | 2.27508600  | 3.35680200  |
| H  | 4.31531500  | 2.73307500  | 1.26337800  |

|   |             |             |             |
|---|-------------|-------------|-------------|
| C | 4.08437900  | 1.40170800  | 4.37219300  |
| H | 3.03563000  | -0.40871600 | 4.88518400  |
| H | 5.03795400  | 3.16130400  | 3.57904100  |
| H | 4.40435800  | 1.59853600  | 5.39894400  |
| C | 3.95825200  | -0.54745100 | -0.61556500 |
| C | 3.64775300  | -1.23689200 | -1.78664200 |
| C | 5.21419400  | -0.70782800 | -0.04150400 |
| C | 4.58238200  | -2.06891900 | -2.37487000 |
| H | 2.65712800  | -1.11594800 | -2.24371600 |
| C | 6.14448700  | -1.54824500 | -0.63095600 |
| H | 5.47283900  | -0.17467700 | 0.87883600  |
| C | 5.83084600  | -2.22863300 | -1.79467500 |
| H | 4.33074100  | -2.60592800 | -3.29333700 |
| H | 7.12848900  | -1.67212400 | -0.17002300 |
| H | 6.56587800  | -2.89484300 | -2.25433100 |
| C | -2.68385800 | -3.05756400 | -0.93557200 |
| H | -2.76931500 | -4.15030600 | -0.87431200 |
| N | -1.75956500 | -2.58569600 | 0.08406300  |
| H | -2.27263400 | -2.79306000 | -1.93056000 |
| S | -0.61086600 | -3.68091000 | 0.57647200  |
| O | 0.12020200  | -3.05426600 | 1.63455800  |
| O | -1.31520400 | -4.90359200 | 0.80833700  |
| C | 0.44786300  | -3.91466200 | -0.79572200 |
| H | -0.12449600 | -4.32816200 | -1.63641800 |
| H | 0.91135300  | -2.95774800 | -1.07677400 |
| H | 1.22969100  | -4.62668200 | -0.50231100 |
| C | -4.75084300 | 0.82881300  | 2.83585300  |
| H | -4.40732800 | 1.87255800  | 2.79233900  |
| H | -5.79536000 | 0.81044700  | 3.17507100  |
| H | -4.12773900 | 0.26628200  | 3.53809100  |
| H | -6.51706400 | 2.35133600  | 1.22842700  |
| C | -2.27048200 | 1.04452500  | -0.44370700 |
| C | -2.39844400 | 1.70830900  | -1.66250700 |
| C | -1.99257400 | 1.80094000  | 0.69562800  |
| C | -2.24186100 | 3.08101200  | -1.74220500 |
| H | -2.61326800 | 1.12804900  | -2.56624400 |
| C | -1.84764100 | 3.17694500  | 0.62047800  |
| H | -1.88451500 | 1.28910700  | 1.66025300  |
| C | -1.97396300 | 3.82003200  | -0.60008800 |
| H | -2.33353200 | 3.58274300  | -2.70975800 |
| H | -1.62936700 | 3.75145100  | 1.52533200  |
| H | -1.86395000 | 4.90663800  | -0.66222900 |

4-3a



$E_{\text{sol}} = -1432.107602$  Hartree

Thermal correction to Free Energy = 0.306360 Hartree

Sum of electronic and thermal Free Energies = -1431.801242 Hartree

Number of Imaginary Frequencies: 0

|   |             |             |             |
|---|-------------|-------------|-------------|
| C | -4.94162200 | -1.25029600 | 0.53245900  |
| C | -4.61462400 | -2.43047900 | -0.14782700 |
| C | -3.31666100 | -2.69357300 | -0.53568100 |
| C | -2.32516400 | -1.75391500 | -0.24285400 |
| C | -2.67932500 | -0.56020300 | 0.42910700  |
| C | -3.98361800 | -0.29981600 | 0.83288800  |
| H | -5.98080600 | -1.07312300 | 0.82745200  |
| H | -5.40501900 | -3.15453300 | -0.36910200 |
| H | -3.06674300 | -3.62254500 | -1.06005800 |
| H | -4.24776800 | 0.62412800  | 1.35633900  |
| C | -0.92699700 | -1.69013700 | -0.45515300 |
| C | -0.49836100 | -0.48924000 | 0.06046000  |
| N | -1.56067600 | 0.19548400  | 0.60587200  |
| C | 0.00352300  | -2.68435700 | -1.03249400 |
| H | 0.06298500  | -3.56839300 | -0.36775100 |
| H | -0.34197300 | -3.06072300 | -2.01198100 |
| C | 0.88978300  | -0.06813500 | 0.01916400  |
| C | 1.37660100  | 1.18832700  | -0.02818500 |
| C | 1.37486300  | -2.07079000 | -1.19769900 |
| H | 2.14002600  | -2.85641500 | -1.29008800 |
| N | 1.69797200  | -1.24037200 | -0.04080000 |
| H | 1.41041800  | -1.44719000 | -2.11580600 |
| S | 3.26742100  | -1.26508800 | 0.45164000  |
| O | 3.36889800  | -0.37396900 | 1.56404500  |
| O | 3.60615400  | -2.64722000 | 0.59541500  |
| C | 4.23520100  | -0.64558600 | -0.87670100 |
| H | 4.10341600  | -1.28747300 | -1.75883200 |
| H | 3.95623700  | 0.38818400  | -1.12139400 |
| H | 5.28913300  | -0.67761600 | -0.56622100 |
| C | -1.49855400 | 1.23660400  | 1.58406600  |
| H | -0.46454000 | 1.37626800  | 1.92144000  |
| H | -1.87244900 | 2.19901900  | 1.19443100  |
| H | -2.10297700 | 0.95488300  | 2.46156700  |
| C | 0.62265700  | 2.41646200  | -0.23885500 |
| C | 0.99689100  | 3.58442300  | 0.43277800  |
| C | -0.43172200 | 2.48882700  | -1.15599400 |
| C | 0.31648100  | 4.77178400  | 0.22855200  |
| H | 1.83231700  | 3.54594800  | 1.14141200  |
| C | -1.10684700 | 3.67902400  | -1.36288900 |
| H | -0.71178900 | 1.59554300  | -1.72661600 |

|   |             |            |             |
|---|-------------|------------|-------------|
| C | -0.74407900 | 4.82305300 | -0.66516900 |
| H | 0.61808500  | 5.67160900 | 0.77493000  |
| H | -1.92483500 | 3.71730800 | -2.08959200 |
| H | -1.28061100 | 5.76229300 | -0.83150900 |
| H | 2.45611900  | 1.32609800 | 0.09412100  |

#### 4-3b

$E_{\text{sol}} = -1432.115732$  Hartree

Thermal correction to Free Energy = 0.305839 Hartree

Sum of electronic and thermal Free Energies = -1431.809893 Hartree

Number of Imaginary Frequencies: 0

|   |             |             |             |
|---|-------------|-------------|-------------|
| C | 5.15536100  | -1.50538900 | 0.44541100  |
| C | 4.63669100  | -2.60228000 | -0.25390600 |
| C | 3.31344600  | -2.63786000 | -0.64473400 |
| C | 2.48788300  | -1.55457600 | -0.33252500 |
| C | 3.03383600  | -0.45434600 | 0.37085800  |
| C | 4.36497900  | -0.41712400 | 0.76779600  |
| H | 6.21079500  | -1.50550700 | 0.73705100  |
| H | 5.29609800  | -3.44272900 | -0.49375800 |
| H | 2.91744900  | -3.49978600 | -1.19359000 |
| C | 1.12645700  | -1.24524600 | -0.56858200 |
| C | 0.88689000  | -0.00801900 | -0.01327900 |
| N | 2.04839700  | 0.46273800  | 0.56281700  |
| C | 0.06977800  | -2.10490300 | -1.14317100 |
| H | -0.30926900 | -1.73180500 | -2.11362900 |
| H | 0.47945200  | -3.10936200 | -1.34239700 |
| C | -1.58800900 | 0.19494600  | -0.17785100 |
| C | -0.35224400 | 0.74248300  | -0.05600200 |
| C | -1.10834000 | -2.26195300 | -0.19358400 |
| H | -1.71217100 | -3.13696500 | -0.47675700 |
| N | -1.99281100 | -1.11566400 | -0.24516700 |
| H | -0.73879300 | -2.42740000 | 0.83823000  |
| S | -3.60655600 | -1.41428200 | 0.06322300  |
| O | -4.32348500 | -0.22145900 | -0.26099600 |
| O | -3.92874000 | -2.64957200 | -0.57671100 |
| C | -3.66115400 | -1.64989500 | 1.79784600  |
| H | -3.03431200 | -2.50879600 | 2.07544400  |
| H | -3.30831700 | -0.73938800 | 2.30110300  |
| H | -4.70307000 | -1.85303600 | 2.08243800  |
| C | 2.19530800  | 1.57469400  | 1.44406200  |
| H | 2.83689500  | 1.28739300  | 2.29221200  |
| H | 2.64804000  | 2.45095500  | 0.94843700  |
| H | 1.22176600  | 1.87374700  | 1.85164800  |
| H | 4.78057300  | 0.44146000  | 1.30469800  |

|   |             |            |             |
|---|-------------|------------|-------------|
| C | -0.29851800 | 2.21762100 | -0.17830500 |
| C | 0.66406600  | 2.82119600 | -0.99216600 |
| C | -1.20838800 | 3.04196600 | 0.48787400  |
| C | 0.71100000  | 4.19704800 | -1.13704300 |
| H | 1.38370700  | 2.19247200 | -1.52945500 |
| C | -1.16808900 | 4.41786500 | 0.33202200  |
| H | -1.95159700 | 2.59053100 | 1.15602700  |
| C | -0.20638100 | 5.00341700 | -0.47832800 |
| H | 1.47080000  | 4.64683300 | -1.78489500 |
| H | -1.89089700 | 5.04345600 | 0.86570700  |
| H | -0.16754100 | 6.09127600 | -0.59170100 |
| H | -2.42344800 | 0.88602500 | -0.31860500 |

### 5-1

$E_{\text{sol}} = -3,092.042207$  Hartree

Thermal correction to Free Energy = 0.506957 Hartree

Sum of electronic and thermal Free Energies = -3,091.53525 Hartree

Number of Imaginary Frequencies = 0

|    |             |             |             |
|----|-------------|-------------|-------------|
| C  | -7.29108900 | 0.97883300  | 2.53006400  |
| C  | -7.25531500 | 1.82764500  | 1.41902200  |
| C  | -6.43389200 | 1.56417900  | 0.34253500  |
| C  | -5.62205300 | 0.42864500  | 0.36957100  |
| C  | -5.69855000 | -0.42800400 | 1.49356500  |
| C  | -6.51507800 | -0.16101100 | 2.58414200  |
| H  | -7.94936900 | 1.21988100  | 3.36930700  |
| H  | -7.89465300 | 2.71530100  | 1.40558100  |
| H  | -6.42496000 | 2.23671700  | -0.52223500 |
| C  | -4.67147000 | -0.14927300 | -0.52324300 |
| C  | -4.24731900 | -1.30223800 | 0.07677200  |
| N  | -4.86001700 | -1.47372800 | 1.27716500  |
| C  | -4.26481600 | 0.35662400  | -1.85806600 |
| H  | -3.57544000 | -0.35434200 | -2.34346800 |
| H  | -5.15151100 | 0.41017100  | -2.51657800 |
| C  | -1.79325400 | 1.39109300  | -0.41079700 |
| C  | -1.92460500 | 0.99988700  | 0.74972900  |
| H  | -3.53196400 | -2.04342400 | -0.27606500 |
| Au | 0.44932800  | 0.94361700  | 0.11700600  |
| P  | 2.70263600  | 0.59974200  | 0.64949600  |
| C  | 3.55196800  | 2.17691200  | 0.90923000  |
| C  | 4.93045100  | 2.31217800  | 0.76075800  |
| C  | 2.80001400  | 3.27457200  | 1.31607700  |
| C  | 5.53967500  | 3.52676100  | 1.01985800  |
| H  | 5.53572800  | 1.46330900  | 0.42617100  |
| C  | 3.41357100  | 4.48731800  | 1.57752700  |

|   |             |             |             |
|---|-------------|-------------|-------------|
| H | 1.71263300  | 3.17171400  | 1.42426300  |
| C | 4.78426100  | 4.61388900  | 1.42845600  |
| H | 6.62167800  | 3.62542800  | 0.89672900  |
| H | 2.81194700  | 5.34386500  | 1.89375300  |
| H | 5.27077500  | 5.57276800  | 1.62713800  |
| C | 2.98907200  | -0.34083500 | 2.16364100  |
| C | 1.91384500  | -0.74762800 | 2.94504300  |
| C | 4.28951400  | -0.62859800 | 2.57583600  |
| C | 2.13820300  | -1.43284200 | 4.12768300  |
| H | 0.88818100  | -0.55374100 | 2.60927600  |
| C | 4.50642000  | -1.31635700 | 3.75439500  |
| H | 5.14478900  | -0.32267000 | 1.96339800  |
| C | 3.43088700  | -1.71574900 | 4.53261100  |
| H | 1.28831100  | -1.75684500 | 4.73437500  |
| H | 5.52835200  | -1.54405700 | 4.06893400  |
| H | 3.60557800  | -2.26021000 | 5.46462900  |
| C | 3.62437700  | -0.22648200 | -0.66050900 |
| C | 3.92737400  | 0.49434100  | -1.81390200 |
| C | 3.91969300  | -1.58402500 | -0.60157200 |
| C | 4.54287300  | -0.13091500 | -2.88110700 |
| H | 3.67736800  | 1.55938300  | -1.87884100 |
| C | 4.53010700  | -2.20492800 | -1.67760400 |
| H | 3.65701600  | -2.16948900 | 0.28416200  |
| C | 4.84628200  | -1.48172000 | -2.81388100 |
| H | 4.78190000  | 0.44335000  | -3.78040900 |
| H | 4.75517200  | -3.27314200 | -1.62442700 |
| H | 5.32697900  | -1.97629600 | -3.66243500 |
| C | -2.06787700 | 0.31579700  | 2.01743300  |
| H | -3.16343200 | 0.33514900  | 2.22725800  |
| H | -1.60705500 | 0.90880600  | 2.82722000  |
| O | -1.54274100 | -0.95892600 | 2.06802800  |
| H | -1.55602500 | -1.33228600 | 1.18045100  |
| C | -3.64332600 | 1.74027300  | -1.89902800 |
| H | -3.75383000 | 2.15586700  | -2.90990300 |
| N | -2.20213800 | 1.73269000  | -1.63528700 |
| H | -4.13963600 | 2.42855500  | -1.18822800 |
| S | -1.25874700 | 2.86263000  | -2.45135400 |
| O | 0.09763100  | 2.50174100  | -2.17523100 |
| O | -1.75619000 | 2.89811300  | -3.78581100 |
| C | -1.61810300 | 4.37297900  | -1.65135700 |
| H | -2.68473900 | 4.60489300  | -1.76512000 |
| H | -1.35094100 | 4.30017200  | -0.58874500 |
| H | -1.01961300 | 5.15940900  | -2.12880900 |
| C | -4.58060500 | -2.50891000 | 2.20977100  |

|    |             |             |             |
|----|-------------|-------------|-------------|
| H  | -4.10584400 | -2.11161700 | 3.12250800  |
| H  | -5.50047300 | -3.04070700 | 2.49911200  |
| H  | -3.89401200 | -3.23246500 | 1.75455200  |
| H  | -6.55000700 | -0.83133300 | 3.44799400  |
| Sb | 0.20275300  | -2.85089300 | -1.08130900 |
| F  | -0.62524100 | -4.19706900 | -0.13872200 |
| F  | 1.62931200  | -3.94080000 | -1.46875900 |
| F  | -0.67979400 | -3.37152200 | -2.60746400 |
| F  | -1.23576500 | -1.74077300 | -0.65611700 |
| F  | 0.97273900  | -1.46398200 | -2.01457400 |
| F  | 1.02188700  | -2.30309400 | 0.47629800  |

### 5-1a-ts

$E_{\text{sol}} = -3092.033898$  Hartree

Thermal correction to Free Energy = 0.507161 Hartree

Sum of electronic and thermal Free Energies = -3,091.526737 Hartree

Number of Imaginary Frequencies = 1

|    |             |             |             |
|----|-------------|-------------|-------------|
| C  | -6.21911200 | 1.53784300  | -2.52263000 |
| C  | -5.76052200 | 0.41009700  | -3.20387000 |
| C  | -5.20384600 | -0.66029100 | -2.52771500 |
| C  | -5.12079200 | -0.59421000 | -1.14499200 |
| C  | -5.62114700 | 0.53425000  | -0.47975800 |
| C  | -6.15781000 | 1.62184700  | -1.14325800 |
| H  | -6.63791100 | 2.37235600  | -3.09053400 |
| H  | -5.83456800 | 0.38020900  | -4.29407800 |
| H  | -4.82891000 | -1.53266800 | -3.07166700 |
| H  | -6.51427400 | 2.50584500  | -0.60903500 |
| C  | -4.56203800 | -1.46835400 | -0.13697000 |
| C  | -4.84066800 | -0.81471600 | 1.07880500  |
| N  | -5.43146600 | 0.35009700  | 0.86969400  |
| C  | -4.44301700 | -2.95418700 | -0.24542600 |
| H  | -4.77495300 | -3.42158900 | 0.69483800  |
| H  | -5.09736300 | -3.33538900 | -1.04403500 |
| C  | -2.46390800 | -1.14996400 | -0.03056900 |
| C  | -1.85123600 | -0.04820300 | -0.34662800 |
| H  | -4.61870700 | -1.14688600 | 2.09383200  |
| Au | 0.26058200  | -0.33992200 | -0.41125800 |
| P  | 2.52974200  | -0.97735900 | -0.38294300 |
| C  | 3.61538900  | -0.35595500 | -1.68506400 |
| C  | 4.55049600  | -1.17150500 | -2.31709200 |
| C  | 3.53176600  | 0.99129200  | -2.03127200 |
| C  | 5.39646100  | -0.64207500 | -3.27650600 |
| H  | 4.62426300  | -2.23198200 | -2.05522400 |
| C  | 4.38508000  | 1.51390400  | -2.98622600 |

|   |             |             |             |
|---|-------------|-------------|-------------|
| H | 2.79769900  | 1.63917600  | -1.54081400 |
| C | 5.31674600  | 0.69945400  | -3.61003300 |
| H | 6.12874300  | -1.28812200 | -3.76795100 |
| H | 4.31634100  | 2.57276000  | -3.24928500 |
| H | 5.98636700  | 1.11563200  | -4.36784200 |
| C | 3.37611600  | -0.63367100 | 1.17224800  |
| C | 2.60663100  | -0.36293200 | 2.29926500  |
| C | 4.76364600  | -0.67420900 | 1.28120100  |
| C | 3.21401600  | -0.14710300 | 3.52335400  |
| H | 1.51459000  | -0.30638900 | 2.20635400  |
| C | 5.36690900  | -0.45558100 | 2.50642200  |
| H | 5.37983100  | -0.88016900 | 0.39903400  |
| C | 4.59403600  | -0.19382600 | 3.62678900  |
| H | 2.60245000  | 0.07184100  | 4.40268300  |
| H | 6.45684800  | -0.48586900 | 2.58645100  |
| H | 5.07661300  | -0.01471300 | 4.59174100  |
| C | 2.55253300  | -2.78022500 | -0.55204700 |
| C | 1.84377700  | -3.33445500 | -1.61835500 |
| C | 3.14858800  | -3.62407800 | 0.37821000  |
| C | 1.74534700  | -4.70615300 | -1.75668900 |
| H | 1.35794600  | -2.67730000 | -2.35014900 |
| C | 3.03497400  | -4.99926700 | 0.24344800  |
| H | 3.70311900  | -3.21008800 | 1.22606100  |
| C | 2.33601300  | -5.54256200 | -0.82034800 |
| H | 1.19341900  | -5.12809200 | -2.60087100 |
| H | 3.50380300  | -5.65340000 | 0.98363600  |
| H | 2.24759200  | -6.62776200 | -0.92183100 |
| C | -2.44746500 | 1.31202800  | -0.54407300 |
| H | -3.25069200 | 1.24277500  | -1.30181900 |
| H | -1.68860900 | 1.99025100  | -0.97153600 |
| O | -3.00101000 | 1.85579800  | 0.60349800  |
| H | -2.26155800 | 2.17705500  | 1.12488700  |
| C | -2.99932100 | -3.34788500 | -0.50454300 |
| H | -2.78044500 | -4.38655000 | -0.22343400 |
| N | -2.17805700 | -2.43463700 | 0.25076500  |
| H | -2.72863600 | -3.21212400 | -1.56505200 |
| S | -1.81223100 | -2.86666300 | 1.86219100  |
| O | -1.85567100 | -1.67343700 | 2.64729100  |
| O | -2.63073000 | -3.99572100 | 2.19042800  |
| C | -0.15546500 | -3.38579800 | 1.68907600  |
| H | -0.09734100 | -4.18985600 | 0.94266100  |
| H | 0.44356900  | -2.51834800 | 1.37883600  |
| H | 0.18714300  | -3.75240600 | 2.66593700  |
| C | -5.73703300 | 1.32488900  | 1.86270600  |

|    |             |            |             |
|----|-------------|------------|-------------|
| H  | -5.45291500 | 0.93785000 | 2.84673800  |
| H  | -5.17544900 | 2.24816500 | 1.66522700  |
| H  | -6.81461900 | 1.54386200 | 1.86092000  |
| Sb | 0.80469500  | 3.55234000 | 0.43122400  |
| F  | 0.61047800  | 2.71655600 | -1.20878200 |
| F  | 1.92252300  | 4.77560700 | -0.36329000 |
| F  | -0.67690300 | 4.57277000 | 0.04808300  |
| F  | -0.32263400 | 2.32941500 | 1.26252600  |
| F  | 1.00580500  | 4.40311700 | 2.04858600  |
| F  | 2.22248600  | 2.43828100 | 0.80883600  |

### 5-1b-ts

$E_{\text{sol}} = -3092.026545$  Hartree

Thermal correction to Free Energy = 0.504512 Hartree

Sum of electronic and thermal Free Energies = -3,091.522033 Hartree

Number of Imaginary Frequencies = 1

|    |             |             |             |
|----|-------------|-------------|-------------|
| C  | -7.01981700 | 1.06146900  | 2.66488400  |
| C  | -6.90007300 | 1.98868800  | 1.62768300  |
| C  | -6.10675400 | 1.73541800  | 0.52655100  |
| C  | -5.41756900 | 0.52662100  | 0.45773200  |
| C  | -5.58149100 | -0.40280900 | 1.50278900  |
| C  | -6.36256900 | -0.15259100 | 2.61946500  |
| H  | -7.64870500 | 1.29777700  | 3.52743700  |
| H  | -7.44721100 | 2.93299100  | 1.69101500  |
| H  | -6.02945800 | 2.47361300  | -0.27741700 |
| C  | -4.51480100 | -0.07066200 | -0.48842300 |
| C  | -4.25022400 | -1.33957100 | 0.01145700  |
| N  | -4.85953800 | -1.52440800 | 1.18738600  |
| C  | -4.30346000 | 0.33050600  | -1.90636200 |
| H  | -3.71874400 | -0.44412700 | -2.43059300 |
| H  | -5.28483400 | 0.36884700  | -2.41121900 |
| C  | -1.78396300 | 1.17170700  | -0.68888900 |
| C  | -2.35769200 | 0.55095400  | 0.27441900  |
| H  | -3.62455300 | -2.12189900 | -0.41661200 |
| Au | 0.32043800  | 1.00729000  | -0.10583100 |
| P  | 2.51828400  | 0.83845400  | 0.68084300  |
| C  | 3.32945000  | 2.45404000  | 0.73234300  |
| C  | 4.70122800  | 2.60648400  | 0.54840300  |
| C  | 2.55280700  | 3.57362000  | 1.01926700  |
| C  | 5.28202500  | 3.85823500  | 0.65454600  |
| H  | 5.32612300  | 1.73771900  | 0.31703500  |
| C  | 3.13834000  | 4.82193500  | 1.13180700  |
| H  | 1.46964700  | 3.45942500  | 1.15581800  |
| C  | 4.50402800  | 4.96523200  | 0.94847100  |

|   |             |             |             |
|---|-------------|-------------|-------------|
| H | 6.35962800  | 3.96787500  | 0.50551400  |
| H | 2.51926000  | 5.69411400  | 1.35911700  |
| H | 4.96639200  | 5.95283800  | 1.02986900  |
| C | 2.66368200  | 0.19639800  | 2.36506200  |
| C | 1.57277300  | -0.40755400 | 2.98029600  |
| C | 3.87152500  | 0.29231000  | 3.05347300  |
| C | 1.68912800  | -0.91226300 | 4.26479900  |
| H | 0.62671800  | -0.50850700 | 2.43658200  |
| C | 3.98245000  | -0.21117800 | 4.33590900  |
| H | 4.74129800  | 0.76130000  | 2.58116400  |
| C | 2.89104800  | -0.81246300 | 4.94314600  |
| H | 0.82774700  | -1.39169600 | 4.73719000  |
| H | 4.93412500  | -0.13342500 | 4.86818900  |
| H | 2.98085000  | -1.20952600 | 5.95808200  |
| C | 3.58474600  | -0.19611700 | -0.34095800 |
| C | 3.89801900  | 0.23923700  | -1.62759600 |
| C | 4.00841200  | -1.45060100 | 0.08015100  |
| C | 4.64663800  | -0.56124400 | -2.46799800 |
| H | 3.55103000  | 1.21891200  | -1.97591000 |
| C | 4.75107300  | -2.25129800 | -0.77119300 |
| H | 3.75033600  | -1.81780100 | 1.07734200  |
| C | 5.07416900  | -1.80905900 | -2.04114400 |
| H | 4.89233400  | -0.20961900 | -3.47339900 |
| H | 5.07447100  | -3.23956200 | -0.43451800 |
| H | 5.65836700  | -2.44539900 | -2.71159500 |
| C | -2.24492800 | -0.00514300 | 1.61296500  |
| H | -3.19375700 | 0.14074800  | 2.16497100  |
| H | -1.51274300 | 0.64253300  | 2.14671800  |
| O | -1.91071100 | -1.34035900 | 1.69789600  |
| H | -1.34315400 | -1.55800900 | 0.95179200  |
| C | -3.64577500 | 1.66956500  | -2.13267800 |
| H | -3.79281900 | 1.97384400  | -3.17599600 |
| N | -2.21505700 | 1.59974600  | -1.90647400 |
| H | -4.09453500 | 2.44406600  | -1.47798300 |
| S | -1.28696300 | 2.77379000  | -2.65122600 |
| O | 0.07752300  | 2.36885800  | -2.51134300 |
| O | -1.86299500 | 2.96048000  | -3.94451500 |
| C | -1.53603500 | 4.21406400  | -1.69292800 |
| H | -2.59917100 | 4.48839600  | -1.69981700 |
| H | -1.19304300 | 4.03282700  | -0.66503300 |
| H | -0.94690200 | 5.02558800  | -2.13876800 |
| C | -4.70471300 | -2.65816400 | 2.03481000  |
| H | -4.13460200 | -2.40103000 | 2.94059700  |
| H | -5.68896000 | -3.04883900 | 2.33182800  |



|    |             |             |             |
|----|-------------|-------------|-------------|
| H  | -4.16177800 | -3.44166900 | 1.49567300  |
| H  | -6.45951400 | -0.88408900 | 3.42613200  |
| Sb | 0.53956600  | -3.15833100 | -0.93325300 |
| F  | -0.28982700 | -4.47472300 | 0.04862100  |
| F  | 2.10218500  | -4.12173700 | -0.94228600 |
| F  | -0.03360200 | -3.95374100 | -2.48807900 |
| F  | -1.03764600 | -2.17112000 | -0.85386300 |
| F  | 1.32114400  | -1.81229800 | -1.91313600 |
| F  | 1.02690200  | -2.32754600 | 0.64364000  |

### 5-2a

$E_{\text{sol}} = -3092.058716$  Hartree

Thermal correction to Free Energy = 0.509411 Hartree

Sum of electronic and thermal Free Energies = -3,091.549305 Hartree

Number of Imaginary Frequencies = 0

|    |             |             |             |
|----|-------------|-------------|-------------|
| C  | -6.50665900 | -0.16972900 | -3.08224400 |
| C  | -5.55971900 | -1.16847500 | -3.26314500 |
| C  | -4.72710100 | -1.56812400 | -2.22613100 |
| C  | -4.86197100 | -0.94346700 | -1.00603500 |
| C  | -5.81487400 | 0.05032200  | -0.85072800 |
| C  | -6.65517100 | 0.46690100  | -1.85890300 |
| H  | -7.14295800 | 0.12827700  | -3.91891400 |
| H  | -5.46367900 | -1.64320900 | -4.24303500 |
| H  | -3.96974900 | -2.34223000 | -2.38226700 |
| H  | -7.39366900 | 1.25849900  | -1.71311200 |
| C  | -4.15829200 | -1.13395100 | 0.30416600  |
| C  | -4.78660400 | -0.06568800 | 1.10318300  |
| N  | -5.73570300 | 0.52797000  | 0.46481600  |
| C  | -4.46004200 | -2.50065700 | 0.96188000  |
| H  | -4.58176100 | -2.37632300 | 2.05095300  |
| H  | -5.37564500 | -2.95929900 | 0.56325400  |
| C  | -2.61244900 | -1.10907900 | 0.25204200  |
| C  | -1.81479800 | -0.24179700 | -0.37603700 |
| H  | -4.55393400 | 0.19092100  | 2.13931300  |
| Au | 0.23831300  | -0.52433900 | -0.41715700 |
| P  | 2.56147500  | -0.99570700 | -0.42174800 |
| C  | 3.50064100  | -0.25898400 | -1.77909100 |
| C  | 4.34373500  | -0.99420200 | -2.60489000 |
| C  | 3.35980400  | 1.11288700  | -1.98599900 |
| C  | 5.03624400  | -0.36395900 | -3.62572700 |
| H  | 4.46506500  | -2.07140900 | -2.45182200 |
| C  | 4.06148300  | 1.73659500  | -3.00011300 |
| H  | 2.69762800  | 1.69862500  | -1.33889800 |
| C  | 4.89804400  | 0.99912700  | -3.82339000 |

|   |             |             |             |
|---|-------------|-------------|-------------|
| H | 5.69636700  | -0.94869500 | -4.27272000 |
| H | 3.94865600  | 2.81345500  | -3.15208000 |
| H | 5.44637900  | 1.49354000  | -4.63037500 |
| C | 3.46417800  | -0.51930700 | 1.06918800  |
| C | 2.78842000  | -0.49632000 | 2.28646500  |
| C | 4.81995500  | -0.20662600 | 1.03306400  |
| C | 3.46442100  | -0.17829700 | 3.45106700  |
| H | 1.71339600  | -0.71353300 | 2.31861900  |
| C | 5.49051400  | 0.11695800  | 2.19975000  |
| H | 5.36072700  | -0.21565200 | 0.08093800  |
| C | 4.81459900  | 0.12931500  | 3.40862800  |
| H | 2.92566500  | -0.15597600 | 4.40195400  |
| H | 6.55449200  | 0.36660000  | 2.16197100  |
| H | 5.34488300  | 0.38969500  | 4.32884700  |
| C | 2.82219900  | -2.78045200 | -0.57110300 |
| C | 2.02091300  | -3.47885500 | -1.47491100 |
| C | 3.75438000  | -3.48055000 | 0.18819600  |
| C | 2.16129800  | -4.84603600 | -1.62621000 |
| H | 1.27469800  | -2.93676200 | -2.06870600 |
| C | 3.88200400  | -4.85252700 | 0.04328700  |
| H | 4.39027600  | -2.95429000 | 0.90667600  |
| C | 3.08990900  | -5.53674700 | -0.86262300 |
| H | 1.53092100  | -5.37989600 | -2.34220600 |
| H | 4.61386200  | -5.39278500 | 0.64973800  |
| H | 3.19240700  | -6.62003000 | -0.97212800 |
| C | -2.41391400 | 1.00642200  | -0.95251800 |
| H | -3.00601400 | 0.74654500  | -1.85540600 |
| H | -1.62121500 | 1.68970900  | -1.30120500 |
| O | -3.28616200 | 1.68187200  | -0.09139700 |
| H | -2.71674000 | 2.12146800  | 0.54608900  |
| C | -3.19872400 | -3.28831700 | 0.69730100  |
| H | -3.07437700 | -4.13937400 | 1.37935800  |
| N | -2.13951000 | -2.31594000 | 0.83922600  |
| H | -3.16990100 | -3.66880500 | -0.33858200 |
| S | -1.45823700 | -2.25173700 | 2.37640100  |
| O | -1.02792200 | -0.91052200 | 2.62772500  |
| O | -2.32150300 | -2.90544000 | 3.32381800  |
| C | -0.06160000 | -3.27210000 | 2.13253200  |
| H | -0.38815400 | -4.27850500 | 1.84027400  |
| H | 0.56072500  | -2.83684200 | 1.33799800  |
| H | 0.49638900  | -3.32730800 | 3.07629100  |
| C | -6.51016700 | 1.62749600  | 0.94453700  |
| H | -6.28934000 | 1.79314900  | 2.00293900  |
| H | -6.25837000 | 2.52964400  | 0.36897400  |

|    |             |            |             |
|----|-------------|------------|-------------|
| H  | -7.57932700 | 1.40975800 | 0.82200400  |
| Sb | 0.62064000  | 3.57946100 | 0.38762500  |
| F  | 0.46973600  | 2.81397000 | -1.28659800 |
| F  | 2.03040100  | 4.58333500 | -0.23431800 |
| F  | -0.57321400 | 4.88232200 | -0.12521900 |
| F  | -0.79609900 | 2.55820900 | 1.01377300  |
| F  | 0.76948800  | 4.35402400 | 2.04858400  |
| F  | 1.79189500  | 2.25286600 | 0.90079400  |

### 5-2b

$E_{\text{sol}} = -3092.074708$  Hartree

Thermal correction to Free Energy = 0.510612 Hartree

Sum of electronic and thermal Free Energies = -3,091.564096 Hartree

Number of Imaginary Frequencies = 0

|    |             |             |             |
|----|-------------|-------------|-------------|
| C  | 7.12446500  | -1.20072200 | 2.50772500  |
| C  | 6.25876200  | -2.23368000 | 2.17875800  |
| C  | 5.23054100  | -2.04757200 | 1.26263600  |
| C  | 5.09332400  | -0.81076600 | 0.67056100  |
| C  | 5.96440000  | 0.20704000  | 1.03152800  |
| C  | 6.98933500  | 0.05635200  | 1.93715200  |
| H  | 7.91869300  | -1.37283000 | 3.23812000  |
| H  | 6.38116000  | -3.20848800 | 2.65806000  |
| H  | 4.53596300  | -2.86128700 | 1.03572100  |
| C  | 4.11238600  | -0.26908200 | -0.33649900 |
| C  | 4.54114200  | 1.15327400  | -0.37686800 |
| N  | 5.59375700  | 1.36928900  | 0.33659700  |
| C  | 4.30043800  | -0.83167500 | -1.75158200 |
| H  | 3.92382300  | -0.10052300 | -2.48707000 |
| H  | 5.36702300  | -0.99917800 | -1.96282100 |
| C  | 1.71469100  | -1.06764100 | -0.64457000 |
| C  | 2.65226400  | -0.39140900 | 0.05751300  |
| H  | 4.12142000  | 1.93248800  | -1.01450000 |
| Au | -0.31598600 | -0.90504700 | -0.10791700 |
| P  | -2.56981100 | -0.78710100 | 0.58029300  |
| C  | -3.39187200 | -2.39785900 | 0.44078700  |
| C  | -4.74655000 | -2.53834700 | 0.15115900  |
| C  | -2.62593700 | -3.53885300 | 0.67031600  |
| C  | -5.31797300 | -3.79781500 | 0.08814900  |
| H  | -5.36373200 | -1.65414900 | -0.03773500 |
| C  | -3.20215100 | -4.79560000 | 0.61682300  |
| H  | -1.55777100 | -3.43375400 | 0.89929800  |
| C  | -4.54924200 | -4.92626300 | 0.32096300  |
| H  | -6.38094300 | -3.89735800 | -0.14763600 |
| H  | -2.59051400 | -5.68303300 | 0.80075300  |

|   |             |             |             |
|---|-------------|-------------|-------------|
| H | -5.00450500 | -5.91897300 | 0.26685000  |
| C | -2.81781800 | -0.32776700 | 2.31126000  |
| C | -1.71508500 | -0.02424900 | 3.09999700  |
| C | -4.09089500 | -0.30929700 | 2.88014600  |
| C | -1.87733700 | 0.29636100  | 4.43765100  |
| H | -0.71409200 | -0.04173200 | 2.65454200  |
| C | -4.25051600 | 0.01461200  | 4.21454800  |
| H | -4.96918200 | -0.54771800 | 2.26899500  |
| C | -3.14424200 | 0.31643800  | 4.99412600  |
| H | -1.00281700 | 0.53476600  | 5.04919000  |
| H | -5.25172500 | 0.02946700  | 4.65314300  |
| H | -3.27365300 | 0.56972600  | 6.04988900  |
| C | -3.59585900 | 0.33860900  | -0.38642600 |
| C | -3.84869000 | 0.01149900  | -1.71782800 |
| C | -4.02647100 | 1.56303900  | 0.10800100  |
| C | -4.54934300 | 0.88198700  | -2.52977800 |
| H | -3.48799200 | -0.93997500 | -2.12620700 |
| C | -4.72318900 | 2.43492600  | -0.71270100 |
| H | -3.80767100 | 1.85318900  | 1.13989800  |
| C | -4.98939600 | 2.09637700  | -2.02696400 |
| H | -4.74594600 | 0.61225200  | -3.57111700 |
| H | -5.05363600 | 3.39865400  | -0.31621100 |
| H | -5.53661800 | 2.79024900  | -2.67083200 |
| C | 2.34109600  | 0.39968500  | 1.28092900  |
| H | 2.88398500  | -0.00642200 | 2.15851000  |
| H | 1.25946600  | 0.33182000  | 1.51011800  |
| O | 2.76344600  | 1.72938300  | 1.18026200  |
| H | 2.16006000  | 2.15087400  | 0.55734000  |
| C | 3.52899200  | -2.10594200 | -1.91040300 |
| H | 3.70207400  | -2.51918600 | -2.91125900 |
| N | 2.12261900  | -1.81256800 | -1.75686000 |
| H | 3.86374500  | -2.86156400 | -1.16725300 |
| S | 1.09788400  | -2.98012200 | -2.33624200 |
| O | -0.18303100 | -2.38248000 | -2.56079400 |
| O | 1.78728900  | -3.61062700 | -3.42112300 |
| C | 0.94504500  | -4.14030900 | -1.03049600 |
| H | 1.92295700  | -4.60023900 | -0.83284000 |
| H | 0.57443200  | -3.62875000 | -0.13120900 |
| H | 0.23023900  | -4.91374800 | -1.33993300 |
| C | 6.24911000  | 2.62733500  | 0.51200700  |
| H | 6.12760300  | 2.96122500  | 1.55186000  |
| H | 7.31942600  | 2.52157700  | 0.29199500  |
| H | 5.80755400  | 3.36631600  | -0.16338600 |
| H | 7.65679200  | 0.87844700  | 2.20452300  |

|    |             |            |             |
|----|-------------|------------|-------------|
| Sb | -0.56373500 | 3.29471500 | -0.63686900 |
| F  | 0.30643500  | 4.48198500 | 0.47027500  |
| F  | -2.13881800 | 4.21592000 | -0.42867700 |
| F  | -0.11786300 | 4.32789100 | -2.09145800 |
| F  | 1.05364400  | 2.38377100 | -0.82711000 |
| F  | -1.35756600 | 2.07111800 | -1.75447500 |
| F  | -0.94339000 | 2.24944900 | 0.83542400  |

### 5-3a

$E_{\text{sol}} = -1315.608984$  Hartree

Thermal correction to Free Energy = 0.266412 Hartree

Sum of electronic and thermal Free Energies = -1,315.342572 Hartree

Number of Imaginary Frequencies = 0

|   |             |             |             |
|---|-------------|-------------|-------------|
| C | 3.06121000  | 2.67225200  | -0.57911000 |
| C | 1.72065100  | 3.00928700  | -0.47063300 |
| C | 0.79434100  | 2.05075900  | -0.05975200 |
| C | 1.22937000  | 0.78153100  | 0.25401400  |
| C | 2.58384600  | 0.45381400  | 0.14120700  |
| C | 3.51586200  | 1.39172400  | -0.28557300 |
| H | 3.78084600  | 3.42596300  | -0.91706600 |
| H | 1.38728600  | 4.02094600  | -0.71770900 |
| H | -0.27050700 | 2.30794000  | -0.00655200 |
| H | 4.57318100  | 1.13385600  | -0.39515500 |
| C | 0.48035100  | -0.44357300 | 0.72524800  |
| C | 1.55566800  | -1.55549500 | 0.60815800  |
| N | 2.79665800  | -0.84146800 | 0.51633600  |
| C | -0.14068100 | -0.29365900 | 2.11267300  |
| H | -0.25700800 | -1.29321600 | 2.56798900  |
| H | 0.45653900  | 0.33083700  | 2.79270600  |
| C | -0.71647900 | -0.74160900 | -0.13127400 |
| C | -0.56850200 | -1.33428200 | -1.31513600 |
| H | 1.56287900  | -2.20691700 | 1.50356200  |
| C | 0.81539600  | -1.81105800 | -1.59639700 |
| H | 1.49656400  | -1.00514300 | -1.95638800 |
| H | 0.81135200  | -2.58594800 | -2.37954400 |
| O | 1.35957100  | -2.42602900 | -0.44988100 |
| C | -1.50365600 | 0.29496700  | 1.83225100  |
| H | -2.25300200 | 0.04278700  | 2.59560700  |
| N | -1.84986100 | -0.33448800 | 0.56622600  |
| H | -1.46805400 | 1.40062900  | 1.74503900  |
| S | -3.25721200 | 0.07514800  | -0.18221200 |
| O | -3.57558600 | -0.97553200 | -1.09625400 |
| O | -4.15523200 | 0.43218600  | 0.86983000  |
| C | -2.87428700 | 1.51251900  | -1.11285500 |

|   |             |             |             |
|---|-------------|-------------|-------------|
| H | -2.61276800 | 2.33438900  | -0.43189400 |
| H | -2.04456500 | 1.29537400  | -1.80086000 |
| H | -3.76756300 | 1.78783000  | -1.69110600 |
| C | 3.97219100  | -1.54863500 | 0.14992200  |
| H | 3.94673900  | -2.55356800 | 0.59606000  |
| H | 4.09182000  | -1.66759200 | -0.94752000 |
| H | 4.86834600  | -1.03561700 | 0.53596700  |
| H | -1.39598900 | -1.57948700 | -1.98168200 |

### 5-3b

$E_{\text{sol}} = -1315.611088$  Hartree

Thermal correction to Free Energy = 0.265910 Hartree

Sum of electronic and thermal Free Energies = -1,315.345178 Hartree

Number of Imaginary Frequencies = 0

|   |             |             |             |
|---|-------------|-------------|-------------|
| C | 3.33055600  | 2.68198500  | -0.37031900 |
| C | 1.98982100  | 2.92707600  | -0.62370300 |
| C | 1.04835100  | 1.91678100  | -0.43149700 |
| C | 1.46796200  | 0.68651900  | 0.02416800  |
| C | 2.82587100  | 0.44655400  | 0.26205500  |
| C | 3.77448000  | 1.43780100  | 0.06633100  |
| H | 4.06461800  | 3.47817300  | -0.53589300 |
| H | 1.67261900  | 3.90828000  | -0.98871300 |
| H | -0.00967100 | 2.09460600  | -0.66609800 |
| C | 0.70601500  | -0.57814600 | 0.35092500  |
| C | 1.85911900  | -1.58280000 | 0.32089200  |
| N | 3.01019800  | -0.84574300 | 0.70153900  |
| C | -0.09306500 | -0.51310700 | 1.64086600  |
| H | -0.30209500 | -1.54171600 | 1.98840800  |
| H | 0.46334600  | 0.00206900  | 2.44054400  |
| C | -1.49086500 | -1.08156400 | -0.66651100 |
| C | -0.16190400 | -1.10986100 | -0.73128200 |
| H | 1.72128600  | -2.46801500 | 0.97853300  |
| C | 0.70703200  | -1.89051600 | -1.65831000 |
| H | 0.85893900  | -1.39771200 | -2.63974100 |
| H | 0.29658800  | -2.90175800 | -1.86504400 |
| O | 1.95704800  | -1.97315000 | -1.02862300 |
| C | -1.39470600 | 0.21023100  | 1.40507000  |
| H | -1.99707900 | 0.25144500  | 2.32427400  |
| N | -2.17102100 | -0.48822300 | 0.39561800  |
| H | -1.18711600 | 1.25724300  | 1.09565000  |
| S | -3.65994200 | 0.14077600  | 0.05434400  |
| O | -4.31462700 | -0.80578500 | -0.79356900 |
| O | -4.22597700 | 0.51779400  | 1.31094300  |
| C | -3.35158600 | 1.59291900  | -0.88222400 |

|   |             |             |             |
|---|-------------|-------------|-------------|
| H | -2.81697000 | 2.33100200  | -0.26858400 |
| H | -2.76663700 | 1.33617400  | -1.77695900 |
| H | -4.32005300 | 2.01244600  | -1.18783800 |
| C | 4.28979900  | -1.46541200 | 0.62016900  |
| H | 4.68735600  | -1.52400800 | -0.41357400 |
| H | 5.01968300  | -0.91619400 | 1.23640500  |
| H | 4.22276300  | -2.48725600 | 1.02233600  |
| H | 4.83979100  | 1.25099100  | 0.23167200  |
| H | -2.13537500 | -1.58206100 | -1.39475100 |
